# Supplementary material
Source: publisher figshare collection journal article supplement (https://diabetesjournals.figshare.com/ndownloader/files/24530708)
Supplement: Supplementary file 1 [file 24530708]

## Sheet: table-S1
Supplementary Table-1: Summary of anthropometric and glucometabolic phenotypes in AAGMEx cohort
					230 Participants for
	All Partcipants				Adipose tissue methylation profiling
Trait [Unit]	N	Mean	StdDev	N	Mean	StdDev
Sex (M/F)	136/120			124/106
Age	256	40.8	11.4		40.6	11.3
Weight [kg]	256	85	18.6		85.1	18.7
Height [cm]	256	171.1	10		171.4	10
BMI [kg/m2]	256	29	5.5		28.9	5.5
Waist [cm]	254	97	15		96.7	14.9
Hip [cm]	252	105.7	12		105.9	12.1
WHR	252	0.92	0.08		0.9	0.1
Fat [%]	232	33.2	9.6		33	9.6
Cholesterol-total [mg/dL]	255	176.8	36.4		175.2	35.7
Triglycerides [mg/dL]	255	84.1	43		82.9	41
HDL-cholesterol [mg/dL]	255	56.1	15.7		55.7	15.4
VLDL-cholesterol [mg/dL]	255	16.9	8.7		16.6	8.2
LDL-cholesterol [mg/dL]	255	103.8	32.3		102.9	32.1
HbA1c [%]	256	5.6	0.3		5.6	0.3
Fasting Insulin(I0) [mu/L]	256	10.1	8.4		10	8.3
Insulin-120min (I120) [mu/L]*	256	62.6	78		63.5	80.6
Fasting Glucose(G0) [mg/dl]	256	91.2	9.4		91.2	9.5
Glucose-120min(G120) [mg/dl]*	255	100.8	29.8		100.8	29.6
MATSUDA index*	249	6.2	6.7		6.1	5.7
HOMA-IR	256	2.3	2		2.3	2
SI [x10-4. (mu/l)^-1.min^-1]**	233	4	3.3		4	3.3
AIRG [mu.l^-1.min]**	233	773	641.6		763	625.6
DI**	233	2276.6	1511.5		2272.2	1506.4
SG [min^-1]**	233	0.019	0.01		0.019	0.011
*, from 75-gm Oral glucose tolerance test; **, from insulin modified (0.03 U/kg) frequently sampled intravenous glucose tolerance test (FSIGT) , units are taken from MINMOD Millennium program;
Three of the 256 participants with >50% European ancestry proportion (ADMIXTURE) were excluded from further analyses

## Sheet: table-S2A
Supplementary Table-2A: cis-eQTM sites for glucometabolic trait-associated transcripts in adipose tissue.
cis-eQTMs significant in linear regression analysis (FDR-P<0.05) and partial correlation r (Spearman’s ) ≥ +0.2 or ≤ -0.2 are shown.
Results are sorted by absolute value of partial correlation coefficient.
eQTM						Linear regression				Partial correlation			Methylation Level			Probe annotation					CpG annotation	ANNOTATR CpG site_annotation				ChromHMM_15state annotation			FALCAN annotation		UCSC allSNP151								RRBS seq-coverage
CpG site	transcript Probe ID	Chr	Start	End	Symbol	Beta	SE	P_value	FDR_P	Corr_Coeff	P_value	FDR_P	N	Mean	StDev	Probe_Id	Entrez_Gene_ID	Symbol	Definition	Gene_symbol	CpG site	cpg_annottype	CountOfAnnotar gene annotation	annotsymbol	gene_annottype	E063_adipose-nuclei	E023_Mesenchymal Stem Cell Derived Adipocyte Cultured Cells	E025_Adipose Derived Mesenchymal Stem Cell Cultured Cells	snpName	nearestReferenceSNP	name	strand	refNCBI	refUCSC	observed	valid	avHet	avHetSE	CpG site	strand	mean_cov (X)	sd_cov
chr10:102714887	ILMN_2258774	10	102746026	102747272	MRPL43	0.242197	0.0280174	1.02358e-15	1.75341e-10	0.54552	1.68e-15	6.4663e-10	182	0.611796	0.364948	ILMN_2258774	84545	MRPL43	mitochondrial ribosomal protein L43 (MRPL43), nuclear gene encoding mitochondrial protein, transcript variant 1, mRNA.	MRPL43	chr10:102714887	hg19_cpg_inter	2	SLF2	hg19_genes_introns	Strong transcription	Strong transcription	Strong transcription	rs4919509		rs4919509	+	C	C	C/T	by-cluster,by-frequency,by-2hit-2allele,by-1000genomes	0.457504	0.139435	chr10:102714887	+	25.9011	9.99951
chr8:144442131	ILMN_2405628	8	144391496	144417061	TOP1MT	-0.200051	0.0238836	5.89816e-15	6.49524e-10	-0.50606	4.68e-15	1.4429e-09	210	0.527618	0.355338	ILMN_2405628	116447	TOP1MT	topoisomerase (DNA) I, mitochondrial (TOP1MT), nuclear gene encoding mitochondrial protein, mRNA.	TOP1MT	chr8:144442131	hg19_cpg_islands	8	TOP1MT	hg19_genes_5UTRs	Quiescent/Low	Weak Repressed PolyComb	Weak Repressed PolyComb	rs748891231		rs748891231	+	G	G	A/G	by-cluster	0	0	chr8:144442131	-	27.3	10.4918
chr8:144442130	ILMN_2405628	8	144391496	144417061	TOP1MT	-0.18876	0.0258717	5.02895e-12	2.50105e-07	-0.50259	1.37e-12	2.7714e-07	175	0.475809	0.370313	ILMN_2405628	116447	TOP1MT	topoisomerase (DNA) I, mitochondrial (TOP1MT), nuclear gene encoding mitochondrial protein, mRNA.	TOP1MT	chr8:144442130	hg19_cpg_islands	8	TOP1MT	hg19_genes_5UTRs	Quiescent/Low	Weak Repressed PolyComb	Weak Repressed PolyComb	rs2931715		rs2931715	+	C	C	C/T	by-cluster,by-frequency,by-1000genomes	0.222333	0.248464	chr8:144442130	+	26.0286	8.81771
chr2:25384585	ILMN_2403664	2	25383721	25391559	POMC	-0.22889	0.0303549	1.14213e-12	6.52169e-08	-0.49217	1.06e-14	2.72773e-09	218	0.243171	0.213534	ILMN_2403664	5443	POMC	proopiomelanocortin (POMC), transcript variant 1, mRNA.	POMC	chr2:25384585	hg19_cpg_islands	6	POMC	hg19_genes_exons	Flanking Active TSS	Active TSS	Active TSS	rs917202708		rs917202708	+	C	C	C/G/T	unknown	0	0	chr2:25384585	+	32.7661	11.5481
chr2:25384345	ILMN_2403664	2	25383721	25391559	POMC	-0.224351	0.0291639	4.47324e-13	3.0193e-08	-0.47778	5.36e-12	6.8814e-07	186	0.488723	0.240493	ILMN_2403664	5443	POMC	proopiomelanocortin (POMC), transcript variant 1, mRNA.	POMC	chr2:25384345	hg19_cpg_islands	3	POMC	hg19_genes_exons	Flanking Active TSS	Active TSS	Active TSS	none	rs771650401(1bp)	none		NA	NA	No SNP				chr2:25384345	-	25.9624	10.0223
chr8:144442164	ILMN_2405628	8	144391496	144417061	TOP1MT	-0.154205	0.0266941	2.51696e-08	0.000320699	-0.4703	2.1e-11	2.02404e-06	182	0.570113	0.365871	ILMN_2405628	116447	TOP1MT	topoisomerase (DNA) I, mitochondrial (TOP1MT), nuclear gene encoding mitochondrial protein, mRNA.	TOP1MT	chr8:144442164	hg19_cpg_islands	6	TOP1MT	hg19_genes_promoters	Quiescent/Low	Weak Repressed PolyComb	Weak Repressed PolyComb	none	rs2977352(1bp)	none		NA	NA	No SNP				chr8:144442164	-	26.6648	9.86331
chr8:600033	ILMN_2104696	8	614199	681226	ERICH1	-0.305794	0.0402633	8.18173e-13	5.13715e-08	-0.45595	5.06e-12	6.8814e-07	207	0.845629	0.200243	ILMN_2104696	157697	ERICH1	glutamate-rich 1 (ERICH1), mRNA.	ERICH1	chr8:600033	hg19_cpg_islands	1		hg19_genes_intergenic	Weak transcription	Weak transcription	Weak transcription	none	rs1328103719(1bp)	none		NA	NA	No SNP				chr8:600033	-	31.5024	11.2836
chr2:25384559	ILMN_1672899	2	25383721	25391559	POMC	-0.352875	0.0531003	2.25206e-10	6.31284e-06	-0.45557	1.44e-12	2.7714e-07	218	0.175437	0.177129	ILMN_1672899	5443	POMC	proopiomelanocortin (POMC), transcript variant 1, mRNA.	POMC	chr2:25384559	hg19_cpg_islands	6	POMC	hg19_genes_exons	Flanking Active TSS	Active TSS	Active TSS	none	rs1427018985(1bp)	none		NA	NA	No SNP				chr2:25384559	-	35.8165	12.8146
chr2:25384585	ILMN_1672899	2	25383721	25391559	POMC	-0.302272	0.0441626	7.19996e-11	2.49485e-06	-0.45429	1.69e-12	2.89212e-07	218	0.243171	0.213534	ILMN_1672899	5443	POMC	proopiomelanocortin (POMC), transcript variant 1, mRNA.	POMC	chr2:25384585	hg19_cpg_islands	6	POMC	hg19_genes_exons	Flanking Active TSS	Active TSS	Active TSS	rs917202708		rs917202708	+	C	C	C/G/T	unknown	0	0	chr2:25384585	+	32.7661	11.5481
chr2:25384541	ILMN_1672899	2	25383721	25391559	POMC	-0.32903	0.047647	5.05456e-11	1.85541e-06	-0.45115	2.5e-12	3.85833e-07	218	0.212271	0.196732	ILMN_1672899	5443	POMC	proopiomelanocortin (POMC), transcript variant 1, mRNA.	POMC	chr2:25384541	hg19_cpg_islands	6	POMC	hg19_genes_exons	Flanking Active TSS	Active TSS	Active TSS	rs775640407		rs775640407	+	G	G	A/C/G	unknown	0.000108	0.007346	chr2:25384541	-	35.8303	12.8204
chr8:600102	ILMN_2104696	8	614199	681226	ERICH1	-0.269646	0.0418132	6.80124e-10	1.63838e-05	-0.44432	4.65e-10	3.116e-05	179	0.813983	0.213381	ILMN_2104696	157697	ERICH1	glutamate-rich 1 (ERICH1), mRNA.	ERICH1	chr8:600102	hg19_cpg_islands	1		hg19_genes_intergenic	Weak transcription	Weak transcription	Weak transcription	rs1455548547		rs1455548547	+	C	C	A/C	unknown	0	0	chr8:600102	+	25.0168	9.32224
chr2:25384294	ILMN_1672899	2	25383721	25391559	POMC	-0.261869	0.0417677	1.82754e-09	3.85968e-05	-0.44169	6.04e-10	3.328e-05	179	0.393778	0.254913	ILMN_1672899	5443	POMC	proopiomelanocortin (POMC), transcript variant 1, mRNA.	POMC	chr2:25384294	hg19_cpg_islands	3	POMC	hg19_genes_exons	Flanking Active TSS	Active TSS	Active TSS	none	rs763301928(1bp)	none		NA	NA	No SNP				chr2:25384294	-	28.2682	10.91
chr2:25384597	ILMN_2403664	2	25383721	25391559	POMC	-0.218395	0.0321632	9.84811e-11	3.23044e-06	-0.44031	9.42e-12	1.11766e-06	218	0.225314	0.204244	ILMN_2403664	5443	POMC	proopiomelanocortin (POMC), transcript variant 1, mRNA.	POMC	chr2:25384597	hg19_cpg_islands	6	POMC	hg19_genes_exons	Flanking Active TSS	Active TSS	Active TSS	rs747250245		rs747250245	+	C	C	C/T	by-frequency	0.000112	0.007482	chr2:25384597	+	32.7615	11.5801
chr2:25384589	ILMN_2403664	2	25383721	25391559	POMC	-0.207043	0.030204	6.78404e-11	2.43235e-06	-0.43701	1.4e-11	1.53936e-06	218	0.269059	0.216448	ILMN_2403664	5443	POMC	proopiomelanocortin (POMC), transcript variant 1, mRNA.	POMC	chr2:25384589	hg19_cpg_islands	6	POMC	hg19_genes_exons	Flanking Active TSS	Active TSS	Active TSS	rs1218150763		rs1218150763	+	C	C	C/T	unknown	0	0	chr2:25384589	+	32.6927	11.6311
chr8:600111	ILMN_2104696	8	614199	681226	ERICH1	-0.244241	0.04065	7.47199e-09	0.000122551	-0.43685	9.74e-10	4.843e-05	179	0.806077	0.221511	ILMN_2104696	157697	ERICH1	glutamate-rich 1 (ERICH1), mRNA.	ERICH1	chr8:600111	hg19_cpg_islands	1		hg19_genes_intergenic	Weak transcription	Weak transcription	Weak transcription	rs1053198187		rs1053198187	+	C	C	C/T	unknown	0	0	chr8:600111	+	24.9944	9.28058
chr2:25384355	ILMN_2403664	2	25383721	25391559	POMC	-0.237469	0.035071	1.09931e-10	3.49383e-06	-0.43542	5.27e-10	3.247e-05	186	0.352991	0.203667	ILMN_2403664	5443	POMC	proopiomelanocortin (POMC), transcript variant 1, mRNA.	POMC	chr2:25384355	hg19_cpg_islands	3	POMC	hg19_genes_exons	Flanking Active TSS	Active TSS	Active TSS	rs779829904		rs779829904	+	G	G	A/G	unknown	2.7e-05	0.003677	chr2:25384355	-	25.957	10.0377
chr2:25384294	ILMN_2403664	2	25383721	25391559	POMC	-0.180412	0.0293119	3.40869e-09	6.11077e-05	-0.43528	1.135e-09	5.468e-05	179	0.393778	0.254913	ILMN_2403664	5443	POMC	proopiomelanocortin (POMC), transcript variant 1, mRNA.	POMC	chr2:25384294	hg19_cpg_islands	3	POMC	hg19_genes_exons	Flanking Active TSS	Active TSS	Active TSS	none	rs763301928(1bp)	none		NA	NA	No SNP				chr2:25384294	-	28.2682	10.91
chr2:25384541	ILMN_2403664	2	25383721	25391559	POMC	-0.231705	0.0333038	3.73937e-11	1.44127e-06	-0.43429	1.93e-11	1.9814e-06	218	0.212271	0.196732	ILMN_2403664	5443	POMC	proopiomelanocortin (POMC), transcript variant 1, mRNA.	POMC	chr2:25384541	hg19_cpg_islands	6	POMC	hg19_genes_exons	Flanking Active TSS	Active TSS	Active TSS	rs775640407		rs775640407	+	G	G	A/C/G	unknown	0.000108	0.007346	chr2:25384541	-	35.8303	12.8204
chr8:600062	ILMN_2104696	8	614199	681226	ERICH1	-0.296486	0.0405184	4.42447e-12	2.35218e-07	-0.43289	7.3e-11	6.62164e-06	207	0.836561	0.200281	ILMN_2104696	157697	ERICH1	glutamate-rich 1 (ERICH1), mRNA.	ERICH1	chr8:600062	hg19_cpg_islands	1		hg19_genes_intergenic	Weak transcription	Weak transcription	Weak transcription	none	rs1210370331(1bp)	none		NA	NA	No SNP				chr8:600062	-	31.5556	11.2804
chr2:25384359	ILMN_2403664	2	25383721	25391559	POMC	-0.206318	0.0327568	1.56086e-09	3.43773e-05	-0.43223	7.26e-10	3.823e-05	186	0.323974	0.219608	ILMN_2403664	5443	POMC	proopiomelanocortin (POMC), transcript variant 1, mRNA.	POMC	chr2:25384359	hg19_cpg_islands	3	POMC	hg19_genes_exons	Flanking Active TSS	Active TSS	Active TSS	rs1037570264		rs1037570264	+	G	G	A/G	unknown	0	0	chr2:25384359	-	25.9839	10.0326
chr8:600069	ILMN_2104696	8	614199	681226	ERICH1	-0.286185	0.0397818	9.26433e-12	4.32819e-07	-0.42792	1.26e-10	1.026e-05	207	0.832163	0.204879	ILMN_2104696	157697	ERICH1	glutamate-rich 1 (ERICH1), mRNA.	ERICH1	chr8:600069	hg19_cpg_islands	1		hg19_genes_intergenic	Weak transcription	Weak transcription	Weak transcription	rs1271067061		rs1271067061	+	G	G	A/G	unknown	0	0	chr8:600069	-	31.5362	11.2667
chr2:25384345	ILMN_1672899	2	25383721	25391559	POMC	-0.29694	0.04244	2.96983e-11	1.22167e-06	-0.42491	1.496e-09	6.406e-05	186	0.488723	0.240493	ILMN_1672899	5443	POMC	proopiomelanocortin (POMC), transcript variant 1, mRNA.	POMC	chr2:25384345	hg19_cpg_islands	3	POMC	hg19_genes_exons	Flanking Active TSS	Active TSS	Active TSS	none	rs771650401(1bp)	none		NA	NA	No SNP				chr2:25384345	-	25.9624	10.0223
chr8:600042	ILMN_2104696	8	614199	681226	ERICH1	-0.273704	0.0378435	7.35652e-12	3.54429e-07	-0.42468	1.8e-10	1.388e-05	207	0.83292	0.215247	ILMN_2104696	157697	ERICH1	glutamate-rich 1 (ERICH1), mRNA.	ERICH1	chr8:600042	hg19_cpg_islands	1		hg19_genes_intergenic	Weak transcription	Weak transcription	Weak transcription	rs1290416691		rs1290416691	+	G	G	C/G	unknown	0	0	chr8:600042	-	31.5362	11.2814
chr8:600222	ILMN_2104696	8	614199	681226	ERICH1	-0.212043	0.0373212	4.10642e-08	0.000476013	-0.4237	3.791e-09	0.00014612	178	0.777164	0.244743	ILMN_2104696	157697	ERICH1	glutamate-rich 1 (ERICH1), mRNA.	ERICH1	chr8:600222	hg19_cpg_islands	1		hg19_genes_intergenic	Weak transcription	Weak transcription	Weak transcription	rs947522142		rs947522142	+	G	G	G/T	unknown	0	0	chr8:600222	-	26.6966	10.2284
chr2:25384559	ILMN_2403664	2	25383721	25391559	POMC	-0.248072	0.0371317	1.84128e-10	5.35611e-06	-0.41894	1.12e-10	9.6302e-06	218	0.175437	0.177129	ILMN_2403664	5443	POMC	proopiomelanocortin (POMC), transcript variant 1, mRNA.	POMC	chr2:25384559	hg19_cpg_islands	6	POMC	hg19_genes_exons	Flanking Active TSS	Active TSS	Active TSS	none	rs1427018985(1bp)	none		NA	NA	No SNP				chr2:25384559	-	35.8165	12.8146
chr8:600042	ILMN_1731001	8	614199	681226	ERICH1	-0.258162	0.0299457	1.19467e-15	1.76494e-10	-0.41848	3.5e-10	2.454e-05	207	0.83292	0.215247	ILMN_1731001	157697	ERICH1	glutamate-rich 1 (ERICH1), mRNA.	ERICH1	chr8:600042	hg19_cpg_islands	1		hg19_genes_intergenic	Weak transcription	Weak transcription	Weak transcription	rs1290416691		rs1290416691	+	G	G	C/G	unknown	0	0	chr8:600042	-	31.5362	11.2814
chr1:63959913	ILMN_1692790	1	63906440	63988944	ITGB3BP	-0.141244	0.0243015	2.09497e-08	0.00028165	-0.41613	6.01e-10	3.328e-05	204	0.840944	0.247814	ILMN_1692790	23421	ITGB3BP	integrin beta 3 binding protein (beta3-endonexin) (ITGB3BP), mRNA.	ITGB3BP	chr1:63959913	hg19_cpg_inter	4	ITGB3BP	hg19_genes_introns	Quiescent/Low	Quiescent/Low	Quiescent/Low	rs10789141		rs10789141	+	C	C	A/C/T	by-cluster,by-frequency,by-2hit-2allele,by-hapmap,by-1000genomes	0.432063	0.171327	chr1:63959913	+	29.6961	11.1654
chr8:600115	ILMN_2104696	8	614199	681226	ERICH1	-0.235827	0.0412244	3.36248e-08	0.000401862	-0.4107	1.128e-08	0.0003782	179	0.804822	0.221051	ILMN_2104696	157697	ERICH1	glutamate-rich 1 (ERICH1), mRNA.	ERICH1	chr8:600115	hg19_cpg_islands	1		hg19_genes_intergenic	Weak transcription	Weak transcription	Weak transcription	none	rs1008071601(1bp)	none		NA	NA	No SNP				chr8:600115	+	25.0168	9.32224
chr8:599954	ILMN_2104696	8	614199	681226	ERICH1	-0.246899	0.0390599	1.37893e-09	3.12636e-05	-0.41008	8.161e-09	0.0002903	183	0.80114	0.230451	ILMN_2104696	157697	ERICH1	glutamate-rich 1 (ERICH1), mRNA.	ERICH1	chr8:599954	hg19_cpg_islands	1		hg19_genes_intergenic	Weak transcription	Weak transcription	Weak transcription	rs1200221357		rs1200221357	+	C	C	C/T	unknown	0	0	chr8:599954	+	28.8579	10.6447
chr8:600033	ILMN_1731001	8	614199	681226	ERICH1	-0.269223	0.0324718	1.02168e-14	1.05009e-09	-0.40541	1.363e-09	6.182e-05	207	0.845629	0.200243	ILMN_1731001	157697	ERICH1	glutamate-rich 1 (ERICH1), mRNA.	ERICH1	chr8:600033	hg19_cpg_islands	1		hg19_genes_intergenic	Weak transcription	Weak transcription	Weak transcription	none	rs1328103719(1bp)	none		NA	NA	No SNP				chr8:600033	-	31.5024	11.2836
chr8:600049	ILMN_2104696	8	614199	681226	ERICH1	-0.282067	0.0418898	1.36314e-10	4.20316e-06	-0.40506	1.412e-09	6.222e-05	207	0.838547	0.197425	ILMN_2104696	157697	ERICH1	glutamate-rich 1 (ERICH1), mRNA.	ERICH1	chr8:600049	hg19_cpg_islands	1		hg19_genes_intergenic	Weak transcription	Weak transcription	Weak transcription	rs1265551815		rs1265551815	+	G	G	A/G	unknown	0	0	chr8:600049	-	31.5266	11.2693
chr2:25384556	ILMN_2403664	2	25383721	25391559	POMC	-0.238829	0.0368818	5.86128e-10	1.48139e-05	-0.40413	5.68e-10	3.328e-05	218	0.170178	0.179307	ILMN_2403664	5443	POMC	proopiomelanocortin (POMC), transcript variant 1, mRNA.	POMC	chr2:25384556	hg19_cpg_islands	6	POMC	hg19_genes_exons	Flanking Active TSS	Active TSS	Active TSS	rs762336368		rs762336368	+	G	G	C/G	unknown	9e-05	0.006724	chr2:25384556	-	35.8303	12.8193
chr8:600234	ILMN_2104696	8	614199	681226	ERICH1	-0.197057	0.0380639	4.99458e-07	0.00334174	-0.40315	2.414e-08	0.00066462	178	0.75981	0.244036	ILMN_2104696	157697	ERICH1	glutamate-rich 1 (ERICH1), mRNA.	ERICH1	chr8:600234	hg19_cpg_islands	1		hg19_genes_intergenic	Weak transcription	Weak transcription	Weak transcription	rs1357561384		rs1357561384	+	G	G	A/G	unknown	0	0	chr8:600234	-	26.6348	10.1951
chr2:25384556	ILMN_1672899	2	25383721	25391559	POMC	-0.329597	0.0530252	2.45008e-09	4.78145e-05	-0.40159	7.44e-10	3.823e-05	218	0.170178	0.179307	ILMN_1672899	5443	POMC	proopiomelanocortin (POMC), transcript variant 1, mRNA.	POMC	chr2:25384556	hg19_cpg_islands	6	POMC	hg19_genes_exons	Flanking Active TSS	Active TSS	Active TSS	rs762336368		rs762336368	+	G	G	C/G	unknown	9e-05	0.006724	chr2:25384556	-	35.8303	12.8193
chr8:599916	ILMN_2104696	8	614199	681226	ERICH1	-0.254974	0.0365856	3.48749e-11	1.37865e-06	-0.40141	1.63e-08	0.00049282	184	0.770713	0.243359	ILMN_2104696	157697	ERICH1	glutamate-rich 1 (ERICH1), mRNA.	ERICH1	chr8:599916	hg19_cpg_islands	1		hg19_genes_intergenic	Weak transcription	Weak transcription	Weak transcription	rs572391939		rs572391939	+	C	C	A/C/T	by-1000genomes	0.000399	0.014124	chr8:599916	+	28.6848	10.6391
chr8:599961	ILMN_2104696	8	614199	681226	ERICH1	-0.255036	0.0409801	2.35156e-09	4.70758e-05	-0.40058	1.757e-08	0.0005209	184	0.820117	0.219689	ILMN_2104696	157697	ERICH1	glutamate-rich 1 (ERICH1), mRNA.	ERICH1	chr8:599961	hg19_cpg_islands	1		hg19_genes_intergenic	Weak transcription	Weak transcription	Weak transcription	none	rs1468955600(1bp)	none		NA	NA	No SNP				chr8:599961	+	28.7609	10.68
chr8:600040	ILMN_2104696	8	614199	681226	ERICH1	-0.258995	0.0410557	1.47819e-09	3.30285e-05	-0.39768	2.967e-09	0.0001186	207	0.838886	0.203107	ILMN_2104696	157697	ERICH1	glutamate-rich 1 (ERICH1), mRNA.	ERICH1	chr8:600040	hg19_cpg_islands	1		hg19_genes_intergenic	Weak transcription	Weak transcription	Weak transcription	rs1164576687		rs1164576687	+	G	G	A/G/T	unknown	0	0	chr8:600040	-	31.5266	11.2655
chr8:144420145	ILMN_2405628	8	144391496	144417061	TOP1MT	-0.195539	0.0346978	5.1941e-08	0.000574431	-0.39764	3.251e-08	0.00086427	180	0.269601	0.283425	ILMN_2405628	116447	TOP1MT	topoisomerase (DNA) I, mitochondrial (TOP1MT), nuclear gene encoding mitochondrial protein, mRNA.	TOP1MT	chr8:144420145	hg19_cpg_shelves	4	TOP1MT	hg19_genes_introns	Weak Repressed PolyComb	Weak Repressed PolyComb	Weak Repressed PolyComb	rs2980268		rs2980268	-	C	C	A/G/T	by-cluster,by-frequency,by-1000genomes	0.234109	0.249494	chr8:144420145	+	25.2056	10.6769
chr2:25384321	ILMN_2403664	2	25383721	25391559	POMC	-0.173971	0.0290898	8.66398e-09	0.000137972	-0.39723	1.981e-08	0.00055955	186	0.420897	0.249254	ILMN_2403664	5443	POMC	proopiomelanocortin (POMC), transcript variant 1, mRNA.	POMC	chr2:25384321	hg19_cpg_islands	3	POMC	hg19_genes_exons	Flanking Active TSS	Active TSS	Active TSS	rs756412997		rs756412997	+	G	G	A/C/G	unknown	2.2e-05	0.003338	chr2:25384321	-	25.9731	10.0315
chr2:25384597	ILMN_1672899	2	25383721	25391559	POMC	-0.274282	0.0470132	1.86848e-08	0.000264283	-0.39604	1.332e-09	6.182e-05	218	0.225314	0.204244	ILMN_1672899	5443	POMC	proopiomelanocortin (POMC), transcript variant 1, mRNA.	POMC	chr2:25384597	hg19_cpg_islands	6	POMC	hg19_genes_exons	Flanking Active TSS	Active TSS	Active TSS	rs747250245		rs747250245	+	C	C	C/T	by-frequency	0.000112	0.007482	chr2:25384597	+	32.7615	11.5801
chr8:600092	ILMN_2104696	8	614199	681226	ERICH1	-0.226536	0.0433943	4.05499e-07	0.00285263	-0.39553	4.256e-08	0.00105199	179	0.799883	0.211796	ILMN_2104696	157697	ERICH1	glutamate-rich 1 (ERICH1), mRNA.	ERICH1	chr8:600092	hg19_cpg_islands	1		hg19_genes_intergenic	Weak transcription	Weak transcription	Weak transcription	rs1466516178		rs1466516178	+	C	C	C/T	unknown	0	0	chr8:600092	+	24.933	9.28064
chr8:600126	ILMN_2104696	8	614199	681226	ERICH1	-0.223415	0.0410081	1.332e-07	0.00120092	-0.39392	6.338e-08	0.0014424	176	0.805076	0.224506	ILMN_2104696	157697	ERICH1	glutamate-rich 1 (ERICH1), mRNA.	ERICH1	chr8:600126	hg19_cpg_islands	1		hg19_genes_intergenic	Weak transcription	Weak transcription	Weak transcription	rs891913390		rs891913390	+	G	G	A/C/G	unknown	0	0	chr8:600126	-	24.7557	9.05933
chr2:25384612	ILMN_2403664	2	25383721	25391559	POMC	-0.191185	0.0315962	5.95816e-09	9.87725e-05	-0.393	3.734e-08	0.00097575	183	0.349485	0.230065	ILMN_2403664	5443	POMC	proopiomelanocortin (POMC), transcript variant 1, mRNA.	POMC	chr2:25384612	hg19_cpg_islands	6	POMC	hg19_genes_exons	Flanking Bivalent TSS/Enh	Active TSS	Weak Repressed PolyComb	none	rs763349234(1bp)	none		NA	NA	No SNP				chr2:25384612	-	25.3115	8.61357
chr8:600049	ILMN_1731001	8	614199	681226	ERICH1	-0.252304	0.0337943	1.80085e-12	9.91579e-08	-0.39047	6.009e-09	0.00022597	207	0.838547	0.197425	ILMN_1731001	157697	ERICH1	glutamate-rich 1 (ERICH1), mRNA.	ERICH1	chr8:600049	hg19_cpg_islands	1		hg19_genes_intergenic	Weak transcription	Weak transcription	Weak transcription	rs1265551815		rs1265551815	+	G	G	A/G	unknown	0	0	chr8:600049	-	31.5266	11.2693
chr1:149871882	ILMN_1793966	1	149871154	149872348	BOLA1	-0.0865944	0.0177959	2.14192e-06	0.0102555	-0.39039	5.092e-08	0.00122657	182	0.738475	0.212492	ILMN_1793966	51027	BOLA1	bolA homolog 1 (E. coli) (BOLA1), mRNA.	BOLA1	chr1:149871882	hg19_cpg_islands	1	BOLA1	hg19_genes_exons	Flanking Active TSS	Active TSS	Flanking Active TSS	rs782219946		rs782219946	+	C	C	C/T	unknown	1.7e-05	0.002911	chr1:149871882	+	25.4451	8.75604
chr1:63959914	ILMN_1692790	1	63906440	63988944	ITGB3BP	-0.166037	0.021882	8.54285e-13	5.13715e-08	-0.38464	1.588e-08	0.00048974	202	0.825016	0.264884	ILMN_1692790	23421	ITGB3BP	integrin beta 3 binding protein (beta3-endonexin) (ITGB3BP), mRNA.	ITGB3BP	chr1:63959914	hg19_cpg_inter	4	ITGB3BP	hg19_genes_introns	Quiescent/Low	Quiescent/Low	Quiescent/Low	rs1205679569		rs1205679569	+	G	G	A/G	unknown	0	0	chr1:63959914	-	28.396	10.2249
chr8:600074	ILMN_2104696	8	614199	681226	ERICH1	-0.247272	0.0385998	8.62568e-10	2.02092e-05	-0.38337	1.186e-08	0.00038901	207	0.809551	0.215894	ILMN_2104696	157697	ERICH1	glutamate-rich 1 (ERICH1), mRNA.	ERICH1	chr8:600074	hg19_cpg_islands	1		hg19_genes_intergenic	Weak transcription	Weak transcription	Weak transcription	rs772507603		rs772507603	+	G	G	A/G/T	unknown	0	0	chr8:600074	-	31.4155	11.2479
chr8:600062	ILMN_1731001	8	614199	681226	ERICH1	-0.260316	0.0327486	9.03189e-14	7.32878e-09	-0.38117	1.46e-08	0.00045945	207	0.836561	0.200281	ILMN_1731001	157697	ERICH1	glutamate-rich 1 (ERICH1), mRNA.	ERICH1	chr8:600062	hg19_cpg_islands	1		hg19_genes_intergenic	Weak transcription	Weak transcription	Weak transcription	none	rs1210370331(1bp)	none		NA	NA	No SNP				chr8:600062	-	31.5556	11.2804
chr2:25384359	ILMN_1672899	2	25383721	25391559	POMC	-0.259746	0.0477168	1.3626e-07	0.00122137	-0.37983	8.942e-08	0.00183824	186	0.323974	0.219608	ILMN_1672899	5443	POMC	proopiomelanocortin (POMC), transcript variant 1, mRNA.	POMC	chr2:25384359	hg19_cpg_islands	3	POMC	hg19_genes_exons	Flanking Active TSS	Active TSS	Active TSS	rs1037570264		rs1037570264	+	G	G	A/G	unknown	0	0	chr2:25384359	-	25.9839	10.0326
chr8:600222	ILMN_1731001	8	614199	681226	ERICH1	-0.160794	0.0310088	4.79743e-07	0.00322983	-0.37919	1.793e-07	0.00333128	178	0.777164	0.244743	ILMN_1731001	157697	ERICH1	glutamate-rich 1 (ERICH1), mRNA.	ERICH1	chr8:600222	hg19_cpg_islands	1		hg19_genes_intergenic	Weak transcription	Weak transcription	Weak transcription	rs947522142		rs947522142	+	G	G	G/T	unknown	0	0	chr8:600222	-	26.6966	10.2284
chr2:25384320	ILMN_2403664	2	25383721	25391559	POMC	-0.153557	0.0298275	5.73219e-07	0.00374586	-0.37915	3.923e-08	0.00100811	197	0.450021	0.240004	ILMN_2403664	5443	POMC	proopiomelanocortin (POMC), transcript variant 1, mRNA.	POMC	chr2:25384320	hg19_cpg_islands	3	POMC	hg19_genes_exons	Flanking Active TSS	Active TSS	Active TSS	rs45463492		rs45463492	-	C	C	A/G/T	by-cluster,by-frequency	0.000111	0.007463	chr2:25384320	+	27.8376	10.5484
chr8:600069	ILMN_1731001	8	614199	681226	ERICH1	-0.238123	0.0326134	4.86971e-12	2.50105e-07	-0.37782	1.996e-08	0.00055955	207	0.832163	0.204879	ILMN_1731001	157697	ERICH1	glutamate-rich 1 (ERICH1), mRNA.	ERICH1	chr8:600069	hg19_cpg_islands	1		hg19_genes_intergenic	Weak transcription	Weak transcription	Weak transcription	rs1271067061		rs1271067061	+	G	G	A/G	unknown	0	0	chr8:600069	-	31.5362	11.2667
chr8:600116	ILMN_2104696	8	614199	681226	ERICH1	-0.208929	0.0392598	2.48132e-07	0.00193207	-0.37388	2.959e-07	0.00495564	177	0.80471	0.234179	ILMN_2104696	157697	ERICH1	glutamate-rich 1 (ERICH1), mRNA.	ERICH1	chr8:600116	hg19_cpg_islands	1		hg19_genes_intergenic	Weak transcription	Weak transcription	Weak transcription	rs1008071601		rs1008071601	+	G	G	A/G/T	unknown	0	0	chr8:600116	-	24.7627	9.04221
chr8:600103	ILMN_2104696	8	614199	681226	ERICH1	-0.204176	0.0397801	6.17303e-07	0.00397252	-0.37356	3.035e-07	0.00495564	177	0.80193	0.232041	ILMN_2104696	157697	ERICH1	glutamate-rich 1 (ERICH1), mRNA.	ERICH1	chr8:600103	hg19_cpg_islands	1		hg19_genes_intergenic	Weak transcription	Weak transcription	Weak transcription	rs1028278100		rs1028278100	+	G	G	A/G	unknown	0	0	chr8:600103	-	24.6949	9.06402
chr2:25384589	ILMN_1672899	2	25383721	25391559	POMC	-0.270306	0.0438931	3.34726e-09	6.07123e-05	-0.37351	1.268e-08	0.00040723	218	0.269059	0.216448	ILMN_1672899	5443	POMC	proopiomelanocortin (POMC), transcript variant 1, mRNA.	POMC	chr2:25384589	hg19_cpg_islands	6	POMC	hg19_genes_exons	Flanking Active TSS	Active TSS	Active TSS	rs1218150763		rs1218150763	+	C	C	C/T	unknown	0	0	chr2:25384589	+	32.6927	11.6311
chr8:600040	ILMN_1731001	8	614199	681226	ERICH1	-0.23013	0.0332466	4.59612e-11	1.72828e-06	-0.3735	2.97e-08	0.00080338	207	0.838886	0.203107	ILMN_1731001	157697	ERICH1	glutamate-rich 1 (ERICH1), mRNA.	ERICH1	chr8:600040	hg19_cpg_islands	1		hg19_genes_intergenic	Weak transcription	Weak transcription	Weak transcription	rs1164576687		rs1164576687	+	G	G	A/G/T	unknown	0	0	chr8:600040	-	31.5266	11.2655
chr8:599940	ILMN_2104696	8	614199	681226	ERICH1	-0.217188	0.0369055	1.43272e-08	0.000216555	-0.37307	1.832e-07	0.00336324	184	0.786738	0.244097	ILMN_2104696	157697	ERICH1	glutamate-rich 1 (ERICH1), mRNA.	ERICH1	chr8:599940	hg19_cpg_islands	1		hg19_genes_intergenic	Weak transcription	Weak transcription	Weak transcription	none	rs1251681590(1bp)	none		NA	NA	No SNP				chr8:599940	+	28.7826	10.6769
chr2:25384320	ILMN_1672899	2	25383721	25391559	POMC	-0.229	0.0423926	1.67407e-07	0.00144997	-0.37307	6.696e-08	0.00147481	197	0.450021	0.240004	ILMN_1672899	5443	POMC	proopiomelanocortin (POMC), transcript variant 1, mRNA.	POMC	chr2:25384320	hg19_cpg_islands	3	POMC	hg19_genes_exons	Flanking Active TSS	Active TSS	Active TSS	rs45463492		rs45463492	-	C	C	A/G/T	by-cluster,by-frequency	0.000111	0.007463	chr2:25384320	+	27.8376	10.5484
chr8:599963	ILMN_2104696	8	614199	681226	ERICH1	-0.213206	0.0392041	1.39771e-07	0.00123844	-0.37255	2.064e-07	0.0035782	183	0.808101	0.233493	ILMN_2104696	157697	ERICH1	glutamate-rich 1 (ERICH1), mRNA.	ERICH1	chr8:599963	hg19_cpg_islands	1		hg19_genes_intergenic	Weak transcription	Weak transcription	Weak transcription	rs1188829353		rs1188829353	+	C	C	C/G	unknown	0	0	chr8:599963	+	28.4426	10.4143
chr2:113346566	ILMN_1764043	2	113239742	113290222	TTL	0.152179	0.0285039	2.28156e-07	0.00181316	0.37057	4.82e-07	0.00707706	174	0.588419	0.243638	ILMN_1764043	150465	TTL	tubulin tyrosine ligase (TTL), mRNA.	TTL	chr2:113346566	hg19_cpg_inter	5	CHCHD5	hg19_genes_exons	Enhancers	Weak transcription	Strong transcription	rs534936292		rs534936292	+	C	C	C/T	by-frequency,by-1000genomes	0.000798	0.019964	chr2:113346566	+	25.3046	9.83766
chr2:25384568	ILMN_2403664	2	25383721	25391559	POMC	-0.23504	0.0425579	9.17378e-08	0.000873052	-0.3696	1.986e-08	0.00055955	217	0.167996	0.15911	ILMN_2403664	5443	POMC	proopiomelanocortin (POMC), transcript variant 1, mRNA.	POMC	chr2:25384568	hg19_cpg_islands	6	POMC	hg19_genes_exons	Flanking Active TSS	Active TSS	Active TSS	rs765522434		rs765522434	+	C	C	A/C/G/T	by-frequency	0.000447	0.014951	chr2:25384568	+	32.8341	11.5193
chr19:53119964	ILMN_2190414	19	53115617	53141644	ZNF83	-0.184911	0.0367265	9.79763e-07	0.00561533	-0.36835	8.025e-08	0.00169495	200	0.58073	0.377527	ILMN_2190414	55769	ZNF83	zinc finger protein 83 (ZNF83), mRNA.	ZNF83	chr19:53119964	hg19_cpg_inter	22	ZNF83	hg19_genes_intronexonboundaries	Strong transcription	ZNF genes & repeats	ZNF genes & repeats	rs970334790		rs970334790	+	C	C	C/T	unknown	0	0	chr19:53119964	+	30.485	11.9437
chr19:1465962	ILMN_1756469	19	1397024	1401569	GAMT	0.338144	0.0599576	5.08373e-08	0.00056795	0.36758	6.362e-08	0.0014424	204	0.289131	0.224731	ILMN_1756469	2593	GAMT	guanidinoacetate N-methyltransferase (GAMT), transcript variant 1, mRNA.	GAMT	chr19:1465962	hg19_cpg_islands	5	APC2	hg19_genes_exons	Bivalent Enhancer	Weak Repressed PolyComb	Weak Repressed PolyComb	none	rs1301505394(1bp)	none		NA	NA	No SNP				chr19:1465962	+	29.5196	10.6148
chr8:599916	ILMN_1731001	8	614199	681226	ERICH1	-0.202067	0.0303063	1.98703e-10	5.67305e-06	-0.36756	2.858e-07	0.00484143	184	0.770713	0.243359	ILMN_1731001	157697	ERICH1	glutamate-rich 1 (ERICH1), mRNA.	ERICH1	chr8:599916	hg19_cpg_islands	1		hg19_genes_intergenic	Weak transcription	Weak transcription	Weak transcription	rs572391939		rs572391939	+	C	C	A/C/T	by-1000genomes	0.000399	0.014124	chr8:599916	+	28.6848	10.6391
chr8:600126	ILMN_1731001	8	614199	681226	ERICH1	-0.183019	0.033729	1.4848e-07	0.00129331	-0.36494	6.363e-07	0.0087587	176	0.805076	0.224506	ILMN_1731001	157697	ERICH1	glutamate-rich 1 (ERICH1), mRNA.	ERICH1	chr8:600126	hg19_cpg_islands	1		hg19_genes_intergenic	Weak transcription	Weak transcription	Weak transcription	rs891913390		rs891913390	+	G	G	A/C/G	unknown	0	0	chr8:600126	-	24.7557	9.05933
chr8:600074	ILMN_1731001	8	614199	681226	ERICH1	-0.218737	0.0312734	3.01113e-11	1.22167e-06	-0.36366	7.201e-08	0.00156366	207	0.809551	0.215894	ILMN_1731001	157697	ERICH1	glutamate-rich 1 (ERICH1), mRNA.	ERICH1	chr8:600074	hg19_cpg_islands	1		hg19_genes_intergenic	Weak transcription	Weak transcription	Weak transcription	rs772507603		rs772507603	+	G	G	A/G/T	unknown	0	0	chr8:600074	-	31.4155	11.2479
chr8:600116	ILMN_1731001	8	614199	681226	ERICH1	-0.171449	0.0322833	2.61737e-07	0.00202438	-0.36273	6.991e-07	0.00937244	177	0.80471	0.234179	ILMN_1731001	157697	ERICH1	glutamate-rich 1 (ERICH1), mRNA.	ERICH1	chr8:600116	hg19_cpg_islands	1		hg19_genes_intergenic	Weak transcription	Weak transcription	Weak transcription	rs1008071601		rs1008071601	+	G	G	A/G/T	unknown	0	0	chr8:600116	-	24.7627	9.04221
chr2:25384357	ILMN_2403664	2	25383721	25391559	POMC	-0.182045	0.0355841	6.68291e-07	0.00420539	-0.36226	3.756e-07	0.00577237	186	0.254621	0.207306	ILMN_2403664	5443	POMC	proopiomelanocortin (POMC), transcript variant 1, mRNA.	POMC	chr2:25384357	hg19_cpg_islands	3	POMC	hg19_genes_exons	Flanking Active TSS	Active TSS	Active TSS	none	rs1199953669(1bp)	none		NA	NA	No SNP				chr2:25384357	-	25.9785	10.0377
chr8:599961	ILMN_1731001	8	614199	681226	ERICH1	-0.216182	0.0335067	6.68571e-10	1.63838e-05	-0.3618	4.505e-07	0.00667816	184	0.820117	0.219689	ILMN_1731001	157697	ERICH1	glutamate-rich 1 (ERICH1), mRNA.	ERICH1	chr8:599961	hg19_cpg_islands	1		hg19_genes_intergenic	Weak transcription	Weak transcription	Weak transcription	none	rs1468955600(1bp)	none		NA	NA	No SNP				chr8:599961	+	28.7609	10.68
chr8:600131	ILMN_1731001	8	614199	681226	ERICH1	-0.221898	0.0379997	1.81762e-08	0.000259469	-0.36078	1.43e-07	0.00275633	201	0.867058	0.184704	ILMN_1731001	157697	ERICH1	glutamate-rich 1 (ERICH1), mRNA.	ERICH1	chr8:600131	hg19_cpg_islands	1		hg19_genes_intergenic	Weak transcription	Weak transcription	Weak transcription	rs1015354561		rs1015354561	+	C	C	C/T	unknown	0	0	chr8:600131	+	29.0497	10.5919
chr2:25384569	ILMN_1672899	2	25383721	25391559	POMC	-0.330089	0.0593333	7.48462e-08	0.000769281	-0.36054	4.299e-08	0.00105199	218	0.164438	0.163769	ILMN_1672899	5443	POMC	proopiomelanocortin (POMC), transcript variant 1, mRNA.	POMC	chr2:25384569	hg19_cpg_islands	6	POMC	hg19_genes_exons	Flanking Active TSS	Active TSS	Active TSS	rs28932471		rs28932471	-	G	G	A/C/T	by-frequency,by-1000genomes	0.000293	0.012094	chr2:25384569	-	35.7661	12.7989
chr8:600231	ILMN_2104696	8	614199	681226	ERICH1	-0.183596	0.0367487	1.17491e-06	0.00646924	-0.36039	7.757e-07	0.0100491	178	0.752389	0.252988	ILMN_2104696	157697	ERICH1	glutamate-rich 1 (ERICH1), mRNA.	ERICH1	chr8:600231	hg19_cpg_islands	1		hg19_genes_intergenic	Weak transcription	Weak transcription	Weak transcription	none	rs1357561384(3bp)	none		NA	NA	No SNP				chr8:600231	-	26.691	10.2373
chr8:600234	ILMN_1731001	8	614199	681226	ERICH1	-0.156511	0.0314168	1.25531e-06	0.00683868	-0.35933	8.398e-07	0.0107009	178	0.75981	0.244036	ILMN_1731001	157697	ERICH1	glutamate-rich 1 (ERICH1), mRNA.	ERICH1	chr8:600234	hg19_cpg_islands	1		hg19_genes_intergenic	Weak transcription	Weak transcription	Weak transcription	rs1357561384		rs1357561384	+	G	G	A/G	unknown	0	0	chr8:600234	-	26.6348	10.1951
chr2:25384590	ILMN_2403664	2	25383721	25391559	POMC	-0.155612	0.032115	2.35245e-06	0.0109572	-0.35907	5.191e-07	0.0072758	185	0.258125	0.231629	ILMN_2403664	5443	POMC	proopiomelanocortin (POMC), transcript variant 1, mRNA.	POMC	chr2:25384590	hg19_cpg_islands	6	POMC	hg19_genes_exons	Flanking Active TSS	Active TSS	Active TSS	rs1286128666		rs1286128666	+	G	G	A/G	unknown	0	0	chr2:25384590	-	25.2865	8.68276
chr8:600153	ILMN_2104696	8	614199	681226	ERICH1	-0.265086	0.0446416	1.08395e-08	0.000168803	-0.35747	1.892e-07	0.00343227	201	0.859772	0.190952	ILMN_2104696	157697	ERICH1	glutamate-rich 1 (ERICH1), mRNA.	ERICH1	chr8:600153	hg19_cpg_islands	1		hg19_genes_intergenic	Weak transcription	Weak transcription	Weak transcription	rs1234399945		rs1234399945	+	C	C	C/T	unknown	0	0	chr8:600153	+	28.9702	10.5546
chr22:39531159	ILMN_2412172	22	39436672	39440428	APOBEC3F	0.292516	0.0474777	3.29612e-09	6.04966e-05	0.35583	6.613e-08	0.00147481	218	0.336395	0.188407	ILMN_2412172	200316	APOBEC3F	apolipoprotein B mRNA editing enzyme, catalytic polypeptide-like 3F (APOBEC3F), transcript variant 2, mRNA.	APOBEC3F	chr22:39531159	hg19_cpg_inter	2	CBX7	hg19_genes_introns	Weak transcription	Quiescent/Low	Weak transcription	none	rs1382155380(1bp)	none		NA	NA	No SNP				chr22:39531159	+	32.578	11.3668
chr2:25384321	ILMN_1672899	2	25383721	25391559	POMC	-0.217878	0.0423221	5.73399e-07	0.00374586	-0.35443	6.929e-07	0.00937131	186	0.420897	0.249254	ILMN_1672899	5443	POMC	proopiomelanocortin (POMC), transcript variant 1, mRNA.	POMC	chr2:25384321	hg19_cpg_islands	3	POMC	hg19_genes_exons	Flanking Active TSS	Active TSS	Active TSS	rs756412997		rs756412997	+	G	G	A/C/G	unknown	2.2e-05	0.003338	chr2:25384321	-	25.9731	10.0315
chr12:4390092	ILMN_1791792	12	4430358	4469190	C12orf5	0.190069	0.0365657	4.51609e-07	0.00308384	0.35394	2.066e-07	0.0035782	204	0.381117	0.228043	ILMN_1791792	57103	C12orf5	chromosome 12 open reading frame 5 (C12orf5), mRNA.	C12orf5	chr12:4390092	hg19_cpg_inter	1	CCND2	hg19_genes_introns	Genic enhancers	Flanking Active TSS	Genic enhancers	rs1172421733		rs1172421733	+	G	G	A/G	unknown	0	0	chr12:4390092	-	33.451	11.9342
chr2:25384291	ILMN_1672899	2	25383721	25391559	POMC	-0.206712	0.040246	6.06851e-07	0.00394766	-0.35317	1.157e-06	0.0136196	180	0.404842	0.270837	ILMN_1672899	5443	POMC	proopiomelanocortin (POMC), transcript variant 1, mRNA.	POMC	chr2:25384291	hg19_cpg_islands	3	POMC	hg19_genes_exons	Flanking Active TSS	Active TSS	Active TSS	none	rs1265427955(1bp)	none		NA	NA	No SNP				chr2:25384291	-	28.1722	10.9452
chr6:168443258	ILMN_1665903	6	168418552	168445769	KIF25	-0.805433	0.168978	3.36434e-06	0.0142906	-0.35231	3.831e-07	0.00579117	197	0.821636	0.177208	ILMN_1665903	3834	KIF25	kinesin family member 25 (KIF25), transcript variant 1, mRNA.		chr6:168443258	hg19_cpg_inter	3	KIF25	hg19_genes_exons	Active TSS	Quiescent/Low	Weak Repressed PolyComb	rs200480792		rs200480792	+	G	G	A/G	by-cluster,by-frequency,by-1000genomes	0.002802	0.037326	chr6:168443258	-	32.0051	13.6854
chr2:25384586	ILMN_2403664	2	25383721	25391559	POMC	-0.163281	0.0327542	1.23634e-06	0.00678323	-0.35197	9.611e-07	0.0119012	184	0.236096	0.225902	ILMN_2403664	5443	POMC	proopiomelanocortin (POMC), transcript variant 1, mRNA.	POMC	chr2:25384586	hg19_cpg_islands	6	POMC	hg19_genes_exons	Flanking Active TSS	Active TSS	Active TSS	rs777627899		rs777627899	+	G	G	A/C/G/T	by-frequency	0.00012	0.007742	chr2:25384586	-	25.3641	8.67022
chr1:28562006	ILMN_1685978	1	28562601	28564616	ATPIF1	0.21706	0.0406131	2.21869e-07	0.00178157	0.35043	9.379e-08	0.00187798	220	0.0781553	0.127215	ILMN_1685978	93974	ATPIF1	ATPase inhibitory factor 1 (ATPIF1), nuclear gene encoding mitochondrial protein, transcript variant 3, mRNA.	ATPIF1	chr1:28562006	hg19_cpg_shores	5	ATP5IF1	hg19_genes_promoters	Flanking Active TSS	Active TSS	Active TSS	rs482249		rs482249	+	G	G	A/C/G	by-cluster,by-frequency,by-2hit-2allele,by-hapmap,by-1000genomes	0.456803	0.140473	chr1:28562006	-	32.5682	11.1138
chr8:600125	ILMN_2104696	8	614199	681226	ERICH1	-0.273707	0.0447496	4.19454e-09	7.18536e-05	-0.34956	3.413e-07	0.00536985	202	0.861102	0.189499	ILMN_2104696	157697	ERICH1	glutamate-rich 1 (ERICH1), mRNA.	ERICH1	chr8:600125	hg19_cpg_islands	1		hg19_genes_intergenic	Weak transcription	Weak transcription	Weak transcription	rs1303370021		rs1303370021	+	C	C	C/T	unknown	0	0	chr8:600125	+	28.9158	10.5829
chr1:28573212	ILMN_1685978	1	28562601	28564616	ATPIF1	-0.109629	0.0188563	2.07591e-08	0.00028165	-0.34913	5.387e-08	0.00125832	230	0.445752	0.267695	ILMN_1685978	93974	ATPIF1	ATPase inhibitory factor 1 (ATPIF1), nuclear gene encoding mitochondrial protein, transcript variant 3, mRNA.	ATPIF1	chr1:28573212	hg19_cpg_shores	1		hg19_genes_intergenic	Flanking Active TSS	Active TSS	Active TSS	none	rs1399132275(5bp)	none		NA	NA	No SNP				chr1:28573212	+	81.9913	30.6906
chr2:25384355	ILMN_1672899	2	25383721	25391559	POMC	-0.275204	0.0518267	2.62613e-07	0.00202438	-0.34882	1.064e-06	0.0128203	186	0.352991	0.203667	ILMN_1672899	5443	POMC	proopiomelanocortin (POMC), transcript variant 1, mRNA.	POMC	chr2:25384355	hg19_cpg_islands	3	POMC	hg19_genes_exons	Flanking Active TSS	Active TSS	Active TSS	rs779829904		rs779829904	+	G	G	A/G	unknown	2.7e-05	0.003677	chr2:25384355	-	25.957	10.0377
chr6:168443258	ILMN_1676679	6	168418552	168445769	KIF25	-0.772289	0.166364	5.85869e-06	0.0215903	-0.34875	5.105e-07	0.00722061	197	0.821636	0.177208	ILMN_1676679	3834	KIF25	kinesin family member 25 (KIF25), transcript variant 2, mRNA.	KIF25	chr6:168443258	hg19_cpg_inter	3	KIF25	hg19_genes_exons	Active TSS	Quiescent/Low	Weak Repressed PolyComb	rs200480792		rs200480792	+	G	G	A/G	by-cluster,by-frequency,by-1000genomes	0.002802	0.037326	chr6:168443258	-	32.0051	13.6854
chr18:56495121	ILMN_1731358	18	56530060	56653709	ZNF532	-0.110331	0.0226657	2.12455e-06	0.0102039	-0.34834	9.257e-08	0.00187787	223	0.521459	0.251769	ILMN_1731358	55205	ZNF532	zinc finger protein 532 (ZNF532), mRNA.	ZNF532	chr18:56495121	hg19_cpg_inter	1		hg19_genes_intergenic	Quiescent/Low	Quiescent/Low	Quiescent/Low	rs1224409785		rs1224409785	+	C	C	A/C	unknown	0	0	chr18:56495121	+	38.1749	14.8318
chr11:63974831	ILMN_2366334	11	63974151	63991363	FERMT3	-0.20418	0.0431964	4.02159e-06	0.0163163	-0.34779	2.025e-07	0.0035782	212	0.381856	0.23621	ILMN_2366334	83706	FERMT3	fermitin family homolog 3 (Drosophila) (FERMT3), transcript variant URP2SF, mRNA.	FERMT3	chr11:63974831	hg19_cpg_islands	6	FERMT3	hg19_genes_5UTRs	Active TSS	Flanking Active TSS	Flanking Active TSS	rs1412649492		rs1412649492	+	G	G	A/G	unknown	0	0	chr11:63974831	-	36.5236	14.2248
chr11:1057258	ILMN_1803779	11	925808	1012245	AP2A2	-0.169788	0.0276953	3.88637e-09	6.73225e-05	-0.34674	7.675e-08	0.00164337	228	0.815864	0.215699	ILMN_1803779	161	AP2A2	adaptor-related protein complex 2, alpha 2 subunit (AP2A2), mRNA.	AP2A2	chr11:1057258	hg19_cpg_shores	1		hg19_genes_intergenic	Weak Repressed PolyComb	Weak Repressed PolyComb	Repressed PolyComb	none	rs142820506(1bp)	none		NA	NA	No SNP				chr11:1057258	-	53.7544	22.3495
chr8:600103	ILMN_1731001	8	614199	681226	ERICH1	-0.167565	0.0327103	6.47045e-07	0.00411451	-0.34666	2.281e-06	0.0224583	177	0.80193	0.232041	ILMN_1731001	157697	ERICH1	glutamate-rich 1 (ERICH1), mRNA.	ERICH1	chr8:600103	hg19_cpg_islands	1		hg19_genes_intergenic	Weak transcription	Weak transcription	Weak transcription	rs1028278100		rs1028278100	+	G	G	A/G	unknown	0	0	chr8:600103	-	24.6949	9.06402
chr8:600133	ILMN_1731001	8	614199	681226	ERICH1	-0.239003	0.0384183	2.38169e-09	4.70758e-05	-0.34493	4.981e-07	0.00717244	202	0.869929	0.18059	ILMN_1731001	157697	ERICH1	glutamate-rich 1 (ERICH1), mRNA.	ERICH1	chr8:600133	hg19_cpg_islands	1		hg19_genes_intergenic	Weak transcription	Weak transcription	Weak transcription	none	rs1015354561(2bp)	none		NA	NA	No SNP				chr8:600133	+	28.9802	10.6196
chr2:25384569	ILMN_2403664	2	25383721	25391559	POMC	-0.235864	0.0414055	3.80543e-08	0.000447856	-0.34479	1.766e-07	0.00331967	218	0.164438	0.163769	ILMN_2403664	5443	POMC	proopiomelanocortin (POMC), transcript variant 1, mRNA.	POMC	chr2:25384569	hg19_cpg_islands	6	POMC	hg19_genes_exons	Flanking Active TSS	Active TSS	Active TSS	rs28932471		rs28932471	-	G	G	A/C/T	by-frequency,by-1000genomes	0.000293	0.012094	chr2:25384569	-	35.7661	12.7989
chr1:161349158	ILMN_2323366	1	161284165	161334535	SDHC	0.163157	0.0293836	7.89696e-08	0.000800982	0.3443	8.419e-08	0.00175408	230	0.620885	0.228445	ILMN_2323366	6391	SDHC	succinate dehydrogenase complex, subunit C, integral membrane protein, 15kDa (SDHC), nuclear gene encoding mitochondrial protein, transcript variant 4, mRNA.	SDHC	chr1:161349158	hg19_cpg_inter	1		hg19_genes_intergenic	Quiescent/Low	Active TSS	Active TSS	none	rs951442316(3bp)	none		NA	NA	No SNP				chr1:161349158	+	78.5783	27.1126
chr8:599963	ILMN_1731001	8	614199	681226	ERICH1	-0.180349	0.0321056	5.69497e-08	0.000618315	-0.34418	1.837e-06	0.0193776	183	0.808101	0.233493	ILMN_1731001	157697	ERICH1	glutamate-rich 1 (ERICH1), mRNA.	ERICH1	chr8:599963	hg19_cpg_islands	1		hg19_genes_intergenic	Weak transcription	Weak transcription	Weak transcription	rs1188829353		rs1188829353	+	C	C	C/G	unknown	0	0	chr8:599963	+	28.4426	10.4143
chr8:600112	ILMN_2104696	8	614199	681226	ERICH1	-0.1949	0.0393197	1.40973e-06	0.00743364	-0.34392	2.774e-06	0.025767	177	0.806905	0.235815	ILMN_2104696	157697	ERICH1	glutamate-rich 1 (ERICH1), mRNA.	ERICH1	chr8:600112	hg19_cpg_islands	1		hg19_genes_intergenic	Weak transcription	Weak transcription	Weak transcription	rs1274841756		rs1274841756	+	G	G	A/G	unknown	0	0	chr8:600112	-	24.7401	9.04096
chr2:25384291	ILMN_2403664	2	25383721	25391559	POMC	-0.139228	0.0282894	1.65918e-06	0.00841449	-0.34392	2.278e-06	0.0224583	180	0.404842	0.270837	ILMN_2403664	5443	POMC	proopiomelanocortin (POMC), transcript variant 1, mRNA.	POMC	chr2:25384291	hg19_cpg_islands	3	POMC	hg19_genes_exons	Flanking Active TSS	Active TSS	Active TSS	none	rs1265427955(1bp)	none		NA	NA	No SNP				chr2:25384291	-	28.1722	10.9452
chr8:144420208	ILMN_2405628	8	144391496	144417061	TOP1MT	0.17855	0.0405754	1.66843e-05	0.0451273	0.34389	1.187e-06	0.013858	190	0.7117	0.24227	ILMN_2405628	116447	TOP1MT	topoisomerase (DNA) I, mitochondrial (TOP1MT), nuclear gene encoding mitochondrial protein, mRNA.	TOP1MT	chr8:144420208	hg19_cpg_shelves	4	TOP1MT	hg19_genes_introns	Weak Repressed PolyComb	Weak Repressed PolyComb	Weak Repressed PolyComb	rs569363111		rs569363111	+	G	G	A/G	by-1000genomes	0.000399	0.014124	chr8:144420208	-	28.7737	11.2859
chr8:599930	ILMN_2104696	8	614199	681226	ERICH1	-0.218943	0.0406034	1.75574e-07	0.0014955	-0.3438	1.888e-06	0.0194796	183	0.819769	0.225629	ILMN_2104696	157697	ERICH1	glutamate-rich 1 (ERICH1), mRNA.	ERICH1	chr8:599930	hg19_cpg_islands	1		hg19_genes_intergenic	Weak transcription	Weak transcription	Weak transcription	none	rs1306066999(1bp)	none		NA	NA	No SNP				chr8:599930	+	28.8579	10.6519
chr3:44349636	ILMN_1754423	3	44379943	44450940	C3orf23	0.0938453	0.0186523	9.9606e-07	0.00566168	0.34344	3.27e-06	0.0300069	175	0.717718	0.331876	ILMN_1754423	285343	C3orf23	chromosome 3 open reading frame 23 (C3orf23), transcript variant 1, mRNA.	C3orf23	chr3:44349636	hg19_cpg_inter	1	TOPAZ1	hg19_genes_introns	Quiescent/Low	Quiescent/Low	Weak Repressed PolyComb	rs7630279		rs7630279	+	G	G	A/G	by-cluster,by-frequency,by-2hit-2allele,by-1000genomes	0.216048	0.247684	chr3:44349636	-	26.6971	9.64632
chr8:600231	ILMN_1731001	8	614199	681226	ERICH1	-0.153315	0.0301582	7.78467e-07	0.00472512	-0.34318	2.739e-06	0.025767	178	0.752389	0.252988	ILMN_1731001	157697	ERICH1	glutamate-rich 1 (ERICH1), mRNA.	ERICH1	chr8:600231	hg19_cpg_islands	1		hg19_genes_intergenic	Weak transcription	Weak transcription	Weak transcription	none	rs1357561384(3bp)	none		NA	NA	No SNP				chr8:600231	-	26.691	10.2373
chr8:600015	ILMN_2104696	8	614199	681226	ERICH1	-0.177711	0.0386492	7.1137e-06	0.025011	-0.34314	3.566e-06	0.0323394	174	0.815479	0.243573	ILMN_2104696	157697	ERICH1	glutamate-rich 1 (ERICH1), mRNA.	ERICH1	chr8:600015	hg19_cpg_islands	1		hg19_genes_intergenic	Weak transcription	Weak transcription	Weak transcription	rs1383574841		rs1383574841	+	C	C	A/C	unknown	0	0	chr8:600015	+	24.7011	9.27688
chr8:600102	ILMN_1731001	8	614199	681226	ERICH1	-0.181579	0.035405	6.29155e-07	0.00402483	-0.34286	2.624e-06	0.0252815	179	0.813983	0.213381	ILMN_1731001	157697	ERICH1	glutamate-rich 1 (ERICH1), mRNA.	ERICH1	chr8:600102	hg19_cpg_islands	1		hg19_genes_intergenic	Weak transcription	Weak transcription	Weak transcription	rs1455548547		rs1455548547	+	C	C	A/C	unknown	0	0	chr8:600102	+	25.0168	9.32224
chr14:31909989	ILMN_1704238	14	31915242	31926680	C14orf126	-0.157671	0.0273273	2.60989e-08	0.000329814	-0.34266	1.991e-07	0.00356999	219	0.615946	0.357754	ILMN_1704238	112487	C14orf126	chromosome 14 open reading frame 126 (C14orf126), mRNA.	C14orf126	chr14:31909989	hg19_cpg_inter	1	HEATR5A	hg19_genes_introns	Weak transcription	Enhancers	Weak transcription	rs1019731207		rs1019731207	+	C	C	C/T	unknown	0	0	chr14:31909989	+	36.7443	14.0973
chr2:25384612	ILMN_1672899	2	25383721	25391559	POMC	-0.253257	0.0456577	8.13034e-08	0.000813276	-0.34117	2.287e-06	0.0224583	183	0.349485	0.230065	ILMN_1672899	5443	POMC	proopiomelanocortin (POMC), transcript variant 1, mRNA.	POMC	chr2:25384612	hg19_cpg_islands	6	POMC	hg19_genes_exons	Flanking Bivalent TSS/Enh	Active TSS	Weak Repressed PolyComb	none	rs763349234(1bp)	none		NA	NA	No SNP				chr2:25384612	-	25.3115	8.61357
chr6:168443224	ILMN_1676679	6	168418552	168445769	KIF25	-0.811188	0.162822	1.2536e-06	0.00683868	-0.34069	9.649e-07	0.0119012	197	0.829052	0.178641	ILMN_1676679	3834	KIF25	kinesin family member 25 (KIF25), transcript variant 2, mRNA.	KIF25	chr6:168443224	hg19_cpg_inter	3	KIF25	hg19_genes_intronexonboundaries	Active TSS	Quiescent/Low	Weak Repressed PolyComb	rs199617561		rs199617561	+	G	G	A/G	by-cluster,by-frequency,by-1000genomes	8.5e-05	0.0065	chr6:168443224	-	32.0761	13.738
chr1:161349136	ILMN_2323366	1	161284165	161334535	SDHC	0.156574	0.028631	1.20215e-07	0.00111069	0.34025	1.218e-07	0.00240778	230	0.616865	0.235344	ILMN_2323366	6391	SDHC	succinate dehydrogenase complex, subunit C, integral membrane protein, 15kDa (SDHC), nuclear gene encoding mitochondrial protein, transcript variant 4, mRNA.	SDHC	chr1:161349136	hg19_cpg_inter	1		hg19_genes_intergenic	Quiescent/Low	Active TSS	Active TSS	none	rs1217404500(1bp)	none		NA	NA	No SNP				chr1:161349136	+	78.6043	27.1152
chr8:599940	ILMN_1731001	8	614199	681226	ERICH1	-0.184439	0.0301835	4.32794e-09	7.3324e-05	-0.33884	2.541e-06	0.0247966	184	0.786738	0.244097	ILMN_1731001	157697	ERICH1	glutamate-rich 1 (ERICH1), mRNA.	ERICH1	chr8:599940	hg19_cpg_islands	1		hg19_genes_intergenic	Weak transcription	Weak transcription	Weak transcription	none	rs1251681590(1bp)	none		NA	NA	No SNP				chr8:599940	+	28.7826	10.6769
chr16:3075321	ILMN_1778010	16	3115784	3119668	IL32	0.127145	0.0281318	1.00122e-05	0.0315022	0.33876	1.86e-06	0.0193776	189	0.832599	0.264925	ILMN_1778010	9235	IL32	interleukin 32 (IL32), transcript variant 7, mRNA.	IL32	chr16:3075321	hg19_cpg_shores	6	THOC6	hg19_genes_introns	Weak transcription	Weak transcription	Weak transcription	rs895196492		rs895196492	+	G	G	A/G	unknown	0	0	chr16:3075321	-	29.7355	13.7215
chr2:25384357	ILMN_1672899	2	25383721	25391559	POMC	-0.249617	0.0510758	1.94358e-06	0.00942285	-0.33869	2.261e-06	0.0224583	186	0.254621	0.207306	ILMN_1672899	5443	POMC	proopiomelanocortin (POMC), transcript variant 1, mRNA.	POMC	chr2:25384357	hg19_cpg_islands	3	POMC	hg19_genes_exons	Flanking Active TSS	Active TSS	Active TSS	none	rs1199953669(1bp)	none		NA	NA	No SNP				chr2:25384357	-	25.9785	10.0377
chr1:28573204	ILMN_1685978	1	28562601	28564616	ATPIF1	-0.109452	0.0205649	2.4745e-07	0.00193207	-0.338	1.492e-07	0.00283902	230	0.393327	0.248345	ILMN_1685978	93974	ATPIF1	ATPase inhibitory factor 1 (ATPIF1), nuclear gene encoding mitochondrial protein, transcript variant 3, mRNA.	ATPIF1	chr1:28573204	hg19_cpg_shores	1		hg19_genes_intergenic	Flanking Active TSS	Active TSS	Active TSS	none	rs1165470846(1bp)	none		NA	NA	No SNP				chr1:28573204	+	81.7739	30.5899
chr8:600012	ILMN_2104696	8	614199	681226	ERICH1	-0.169467	0.0370725	7.99929e-06	0.0268686	-0.3362	5.746e-06	0.0473763	174	0.803849	0.254162	ILMN_2104696	157697	ERICH1	glutamate-rich 1 (ERICH1), mRNA.	ERICH1	chr8:600012	hg19_cpg_islands	1		hg19_genes_intergenic	Weak transcription	Weak transcription	Weak transcription	rs377138651		rs377138651	+	C	C	C/T	by-cluster,by-1000genomes	0.000399	0.014124	chr8:600012	+	24.6379	9.24309
chr11:118081899	ILMN_1778723	11	118064441	118084074	AMICA1	0.424663	0.0806575	3.26928e-07	0.00242323	0.33584	4.882e-06	0.0422864	177	0.2874	0.250871	ILMN_1778723	120425	AMICA1	adhesion molecule, interacts with CXADR antigen 1 (AMICA1), mRNA.	AMICA1	chr11:118081899	hg19_cpg_inter	7	JAML	hg19_genes_introns	Weak transcription	Bivalent Enhancer	Bivalent Enhancer	rs1045305773		rs1045305773	+	C	C	C/T	unknown	0	0	chr11:118081899	+	26.1186	9.7236
chr8:600131	ILMN_2104696	8	614199	681226	ERICH1	-0.275531	0.0460745	8.68071e-09	0.000137972	-0.33385	1.277e-06	0.0145822	201	0.867058	0.184704	ILMN_2104696	157697	ERICH1	glutamate-rich 1 (ERICH1), mRNA.	ERICH1	chr8:600131	hg19_cpg_islands	1		hg19_genes_intergenic	Weak transcription	Weak transcription	Weak transcription	rs1015354561		rs1015354561	+	C	C	C/T	unknown	0	0	chr8:600131	+	29.0497	10.5919
chr10:11784800	ILMN_2072178	10	11784355	11806065	ECHDC3	-0.530276	0.111251	3.36474e-06	0.0142906	-0.33355	7.528e-07	0.00983575	210	0.248011	0.21173	ILMN_2072178	79746	ECHDC3	enoyl Coenzyme A hydratase domain containing 3 (ECHDC3), mRNA.	ECHDC3	chr10:11784800	hg19_cpg_islands	2	ECHDC3	hg19_genes_introns	#N/A	Active TSS	Bivalent/Poised TSS	none	rs968170996(1bp)	none		NA	NA	No SNP				chr10:11784800	-	29.4619	10.5722
chr5:134364054	ILMN_1674386	5	134363423	134369964	PITX1	0.135657	0.0268929	9.36937e-07	0.00547158	0.33347	2.747e-06	0.025767	189	0.45763	0.223449	ILMN_1674386	5307	PITX1	paired-like homeodomain transcription factor 1 (PITX1), mRNA.	PITX1	chr5:134364054	hg19_cpg_islands	3	PITX1	hg19_genes_exons	Repressed PolyComb	Repressed PolyComb	Repressed PolyComb	rs1300627181		rs1300627181	+	C	C	C/T	unknown	0	0	chr5:134364054	+	27.3598	9.01758
chr8:600092	ILMN_1731001	8	614199	681226	ERICH1	-0.162641	0.0361841	1.11436e-05	0.0341831	-0.33318	5.18e-06	0.0436429	179	0.799883	0.211796	ILMN_1731001	157697	ERICH1	glutamate-rich 1 (ERICH1), mRNA.	ERICH1	chr8:600092	hg19_cpg_islands	1		hg19_genes_intergenic	Weak transcription	Weak transcription	Weak transcription	rs1466516178		rs1466516178	+	C	C	C/T	unknown	0	0	chr8:600092	+	24.933	9.28064
chr7:28998407	ILMN_1682928	7	29035246	29186153	CPVL	1.06783	0.2038	3.69682e-07	0.00265092	0.33255	3.089e-07	0.00496038	226	0.0771109	0.0956938	ILMN_1682928	54504	CPVL	carboxypeptidase, vitellogenic-like (CPVL), transcript variant 2, mRNA.	CPVL	chr7:28998407	hg19_cpg_islands	1	TRIL	hg19_genes_promoters	Flanking Active TSS	Quiescent/Low	Enhancers	rs181596429		rs181596429	+	C	C	C/T	by-1000genomes	0.000399	0.014124	chr7:28998407	+	44.1903	16.9947
chr16:31120555	ILMN_2398274	16	31212806	31214097	PYCARD	0.104769	0.0208158	9.87552e-07	0.00563901	0.33206	4.104e-07	0.00614346	222	0.442685	0.202492	ILMN_2398274	29108	PYCARD	PYD and CARD domain containing (PYCARD), transcript variant 2, mRNA.	PYCARD	chr16:31120555	hg19_cpg_islands	6	BCKDK	hg19_genes_exons	Flanking Active TSS	Flanking Active TSS	Active TSS	rs760422765		rs760422765	+	C	C	A/C	unknown	3.2e-05	0.00397	chr16:31120555	+	37.027	13.59
chr8:600153	ILMN_1731001	8	614199	681226	ERICH1	-0.211397	0.0368698	3.14444e-08	0.000381721	-0.33164	1.515e-06	0.0166205	201	0.859772	0.190952	ILMN_1731001	157697	ERICH1	glutamate-rich 1 (ERICH1), mRNA.	ERICH1	chr8:600153	hg19_cpg_islands	1		hg19_genes_intergenic	Weak transcription	Weak transcription	Weak transcription	rs1234399945		rs1234399945	+	C	C	C/T	unknown	0	0	chr8:600153	+	28.9702	10.5546
chr18:74818424	ILMN_1672660	18	74724738	74844774	MBP	-0.335292	0.0639332	3.61184e-07	0.00262162	-0.33102	7.254e-07	0.00964151	214	0.575973	0.239014	ILMN_1672660	4155	MBP	myelin basic protein (MBP), transcript variant 8, mRNA.	MBP	chr18:74818424	hg19_cpg_inter	2	MBP	hg19_genes_introns	Enhancers	Weak transcription	Enhancers	rs765506737		rs765506737	+	C	C	C/T	by-cluster	0	0	chr18:74818424	+	33.5794	12.9459
chr3:88064825	ILMN_1752631	3	88101099	88108146	CGGBP1	-0.162173	0.0303053	2.14698e-07	0.00175764	-0.33094	3.34e-07	0.0053094	227	0.599316	0.352269	ILMN_1752631	8545	CGGBP1	CGG triplet repeat binding protein 1 (CGGBP1), transcript variant 1, mRNA.	CGGBP1	chr3:88064825	hg19_cpg_inter	1		hg19_genes_intergenic	Quiescent/Low	Quiescent/Low	Quiescent/Low	rs4858976		rs4858976	+	C	C	A/C/T	by-cluster,by-frequency,by-2hit-2allele,by-1000genomes	0.492037	0.062595	chr3:88064825	+	43.1057	14.818
chr8:600133	ILMN_2104696	8	614199	681226	ERICH1	-0.287703	0.0468141	3.58359e-09	6.35047e-05	-0.33081	1.52e-06	0.0166205	202	0.869929	0.18059	ILMN_2104696	157697	ERICH1	glutamate-rich 1 (ERICH1), mRNA.	ERICH1	chr8:600133	hg19_cpg_islands	1		hg19_genes_intergenic	Weak transcription	Weak transcription	Weak transcription	none	rs1015354561(2bp)	none		NA	NA	No SNP				chr8:600133	+	28.9802	10.6196
chr6:168390768	ILMN_1665903	6	168418552	168445769	KIF25	0.899586	0.192341	5.02018e-06	0.0192557	0.33079	3.002e-07	0.00495564	229	0.893531	0.143169	ILMN_1665903	3834	KIF25	kinesin family member 25 (KIF25), transcript variant 1, mRNA.		chr6:168390768	hg19_cpg_islands	1		hg19_genes_intergenic	Weak transcription	Weak Repressed PolyComb	Weak transcription	rs79241285		rs79241285	+	G	G	A/G/T	by-cluster	0.5	0	chr6:168390768	-	60.5415	25.8363
chr6:168443224	ILMN_1665903	6	168418552	168445769	KIF25	-0.821289	0.165873	1.44598e-06	0.00753141	-0.33064	2.082e-06	0.0211128	197	0.829052	0.178641	ILMN_1665903	3834	KIF25	kinesin family member 25 (KIF25), transcript variant 1, mRNA.		chr6:168443224	hg19_cpg_inter	3	KIF25	hg19_genes_intronexonboundaries	Active TSS	Quiescent/Low	Weak Repressed PolyComb	rs199617561		rs199617561	+	G	G	A/G	by-cluster,by-frequency,by-1000genomes	8.5e-05	0.0065	chr6:168443224	-	32.0761	13.738
chr1:161349141	ILMN_2323366	1	161284165	161334535	SDHC	0.161571	0.029187	8.59885e-08	0.000835831	0.32991	3.054e-07	0.00495564	230	0.605244	0.23018	ILMN_2323366	6391	SDHC	succinate dehydrogenase complex, subunit C, integral membrane protein, 15kDa (SDHC), nuclear gene encoding mitochondrial protein, transcript variant 4, mRNA.	SDHC	chr1:161349141	hg19_cpg_inter	1		hg19_genes_intergenic	Quiescent/Low	Active TSS	Active TSS	rs1289197958		rs1289197958	+	C	C	C/G	unknown	0	0	chr1:161349141	+	78.6	27.1388
chr2:239025645	ILMN_2115862	2	239008950	239041928	ESPNL	-0.140076	0.0261901	2.17749e-07	0.00175764	-0.32966	8.914e-06	0.0645181	174	0.72021	0.333004	ILMN_2115862	339768	ESPNL	espin-like (ESPNL), mRNA.	ESPNL	chr2:239025645	hg19_cpg_inter	3	ESPNL	hg19_genes_exons	Repressed PolyComb	Weak Repressed PolyComb	Weak Repressed PolyComb	rs11897736		rs11897736	+	C	C	A/C/T	by-cluster,by-frequency,by-2hit-2allele,by-hapmap,by-1000genomes	0.300035	0.244959	chr2:239025645	+	24.2414	8.19695
chr3:158443556	ILMN_1789751	3	158519714	158547508	MFSD1	0.263272	0.0590603	1.30719e-05	0.0379534	0.32919	2.059e-06	0.0210214	199	0.22554	0.213193	ILMN_1789751	64747	MFSD1	major facilitator superfamily domain containing 1 (MFSD1), mRNA.	MFSD1	chr3:158443556	hg19_cpg_inter	2	RARRES1	hg19_genes_introns	Enhancers	Enhancers	Enhancers	rs1296833417		rs1296833417	+	ACCCCGGG	ACCCCGGG	-/ACCCCGGG	unknown	0	0	chr3:158443556	-	27.5075	10.3986
chr17:46696993	ILMN_1798496	17	46689707	46692301	HOXB8	0.6397	0.125918	7.90969e-07	0.00474496	0.32837	3.49e-07	0.00543507	230	0.487962	0.120543	ILMN_1798496	3218	HOXB8	homeobox B8 (HOXB8), mRNA.	HOXB8	chr17:46696993	hg19_cpg_shores	1	HOXB8	hg19_genes_1to5kb	Repressed PolyComb	Repressed PolyComb	Repressed PolyComb	rs548304182		rs548304182	+	G	G	G/T	by-frequency,by-1000genomes	0.001596	0.028205	chr17:46696993	-	140.774	37.8259
chr16:88744849	ILMN_1744604	16	88709696	88717492	CYBA	0.421728	0.0781633	1.72789e-07	0.00147996	0.32813	1.033e-06	0.0126375	212	0.409078	0.242053	ILMN_1744604	1535	CYBA	cytochrome b-245, alpha polypeptide (CYBA), mRNA.	CYBA	chr16:88744849	hg19_cpg_shelves	4	SNAI3	hg19_genes_exons	Repressed PolyComb	Weak Repressed PolyComb	Repressed PolyComb	rs778411889		rs778411889	+	G	G	A/G	by-frequency	6.8e-05	0.005831	chr16:88744849	-	30.1462	11.4491
chr7:45068250	ILMN_1692295	7	45002259	45018704	MYO1G	-0.402513	0.0721581	6.94264e-08	0.000728138	-0.32745	3.782e-07	0.00577237	230	0.698679	0.133202	ILMN_1692295	64005	MYO1G	myosin IG (MYO1G), mRNA.	MYO1G	chr7:45068250	hg19_cpg_inter	7	CCM2	hg19_genes_introns	Active TSS	Strong transcription	Weak transcription	rs913160597		rs913160597	+	C	C	C/T	unknown	0	0	chr7:45068250	+	144.896	42.2376
chr11:63974831	ILMN_2366330	11	63974151	63991363	FERMT3	-0.333791	0.0715341	5.2679e-06	0.020004	-0.32727	1.106e-06	0.0131177	212	0.381856	0.23621	ILMN_2366330	83706	FERMT3	fermitin family homolog 3 (Drosophila) (FERMT3), transcript variant URP2SF, mRNA.	FERMT3	chr11:63974831	hg19_cpg_islands	6	FERMT3	hg19_genes_5UTRs	Active TSS	Flanking Active TSS	Flanking Active TSS	rs1412649492		rs1412649492	+	G	G	A/G	unknown	0	0	chr11:63974831	-	36.5236	14.2248
chr8:599930	ILMN_1731001	8	614199	681226	ERICH1	-0.179937	0.0333819	1.77303e-07	0.00150194	-0.32618	6.602e-06	0.0522004	183	0.819769	0.225629	ILMN_1731001	157697	ERICH1	glutamate-rich 1 (ERICH1), mRNA.	ERICH1	chr8:599930	hg19_cpg_islands	1		hg19_genes_intergenic	Weak transcription	Weak transcription	Weak transcription	none	rs1306066999(1bp)	none		NA	NA	No SNP				chr8:599930	+	28.8579	10.6519
chr2:25384265	ILMN_1672899	2	25383721	25391559	POMC	-0.213041	0.0457135	5.40538e-06	0.0204255	-0.32538	8.315e-06	0.0619289	180	0.248868	0.238444	ILMN_1672899	5443	POMC	proopiomelanocortin (POMC), transcript variant 1, mRNA.	POMC	chr2:25384265	hg19_cpg_islands	3	POMC	hg19_genes_exons	Flanking Active TSS	Active TSS	Active TSS	none	rs1402581089(1bp)	none		NA	NA	No SNP				chr2:25384265	-	28.2056	10.9553
chr19:6744964	ILMN_1655414	19	6663147	6670599	TNFSF14	0.129965	0.0247677	3.56116e-07	0.00260205	0.32418	8.908e-07	0.0111658	220	0.330347	0.218746	ILMN_1655414	8740	TNFSF14	tumor necrosis factor (ligand) superfamily, member 14 (TNFSF14), transcript variant 1, mRNA.	TNFSF14	chr19:6744964	hg19_cpg_shores	8	TRIP10	hg19_genes_exons	Transcr. at gene 5' and 3'	Flanking Active TSS	Enhancers	rs920707723		rs920707723	+	C	C	C/T	unknown	0	0	chr19:6744964	+	33.7045	12.8546
chr17:46697116	ILMN_1798496	17	46689707	46692301	HOXB8	0.559526	0.109235	6.48511e-07	0.00411451	0.32414	5.024e-07	0.00717244	230	0.644572	0.137885	ILMN_1798496	3218	HOXB8	homeobox B8 (HOXB8), mRNA.	HOXB8	chr17:46697116	hg19_cpg_shores	1	HOXB8	hg19_genes_1to5kb	Repressed PolyComb	Repressed PolyComb	Repressed PolyComb	rs551324510		rs551324510	+	G	G	A/G	by-frequency,by-1000genomes	0.000798	0.019964	chr17:46697116	-	109.448	32.0241
chr17:34866546	ILMN_3244114	17	34948225	34957233	DHRS11	-0.206827	0.0465627	1.39847e-05	0.0395606	-0.32402	1.3e-05	0.0816152	174	0.621269	0.355031	ILMN_3244114	79154	DHRS11	dehydrogenase/reductase (SDR family) member 11 (DHRS11), mRNA.	DHRS11	chr17:34866546	hg19_cpg_inter	4	MYO19	hg19_genes_introns	Strong transcription	Strong transcription	Strong transcription	rs2306593		rs2306593	+	C	C	C/T	by-cluster,by-frequency,by-2hit-2allele,by-1000genomes	0.499999	0.00061	chr17:34866546	+	23.9253	8.85399
chr8:599954	ILMN_1731001	8	614199	681226	ERICH1	-0.19233	0.0324016	1.09683e-08	0.000169101	-0.324	7.669e-06	0.0583116	183	0.80114	0.230451	ILMN_1731001	157697	ERICH1	glutamate-rich 1 (ERICH1), mRNA.	ERICH1	chr8:599954	hg19_cpg_islands	1		hg19_genes_intergenic	Weak transcription	Weak transcription	Weak transcription	rs1200221357		rs1200221357	+	C	C	C/T	unknown	0	0	chr8:599954	+	28.8579	10.6447
chr11:63974842	ILMN_2366330	11	63974151	63991363	FERMT3	-0.339882	0.0762735	1.31609e-05	0.0381399	-0.32372	1.465e-06	0.016251	212	0.346758	0.2198	ILMN_2366330	83706	FERMT3	fermitin family homolog 3 (Drosophila) (FERMT3), transcript variant URP2SF, mRNA.	FERMT3	chr11:63974842	hg19_cpg_islands	4	FERMT3	hg19_genes_exons	Active TSS	Flanking Active TSS	Flanking Active TSS	rs767213325		rs767213325	+	G	G	A/G	by-frequency	5e-05	0.004984	chr11:63974842	-	36.5566	14.2307
chr8:600112	ILMN_1731001	8	614199	681226	ERICH1	-0.163826	0.032245	7.89613e-07	0.00474496	-0.32351	1.1e-05	0.0748021	177	0.806905	0.235815	ILMN_1731001	157697	ERICH1	glutamate-rich 1 (ERICH1), mRNA.	ERICH1	chr8:600112	hg19_cpg_islands	1		hg19_genes_intergenic	Weak transcription	Weak transcription	Weak transcription	rs1274841756		rs1274841756	+	G	G	A/G	unknown	0	0	chr8:600112	-	24.7401	9.04096
chr6:168390768	ILMN_1676679	6	168418552	168445769	KIF25	0.863629	0.189328	8.34505e-06	0.027848	0.32226	6.241e-07	0.0086689	229	0.893531	0.143169	ILMN_1676679	3834	KIF25	kinesin family member 25 (KIF25), transcript variant 2, mRNA.	KIF25	chr6:168390768	hg19_cpg_islands	1		hg19_genes_intergenic	Weak transcription	Weak Repressed PolyComb	Weak transcription	rs79241285		rs79241285	+	G	G	A/G/T	by-cluster	0.5	0	chr6:168390768	-	60.5415	25.8363
chr2:25384568	ILMN_1672899	2	25383721	25391559	POMC	-0.298649	0.0616628	2.37596e-06	0.0110334	-0.32215	1.247e-06	0.0144125	217	0.167996	0.15911	ILMN_1672899	5443	POMC	proopiomelanocortin (POMC), transcript variant 1, mRNA.	POMC	chr2:25384568	hg19_cpg_islands	6	POMC	hg19_genes_exons	Flanking Active TSS	Active TSS	Active TSS	rs765522434		rs765522434	+	C	C	A/C/G/T	by-frequency	0.000447	0.014951	chr2:25384568	+	32.8341	11.5193
chr22:37908796	ILMN_1687306	22	37966252	37976024	LGALS2	0.245226	0.0421282	2.00128e-08	0.000280492	0.32167	6.563e-07	0.0089538	229	0.324572	0.189382	ILMN_1687306	3957	LGALS2	lectin, galactoside-binding, soluble, 2 (LGALS2), mRNA.	LGALS2	chr22:37908796	hg19_cpg_shelves	4	CARD10	hg19_genes_introns	Enhancers	Flanking Active TSS	Flanking Active TSS	rs1187664415		rs1187664415	+	C	C	C/T	unknown	0	0	chr22:37908796	+	47.0131	16.738
chr22:50648189	ILMN_1694810	22	50609159	50618724	PANX2	0.125333	0.026341	3.49425e-06	0.0147593	0.32139	7.716e-06	0.0583116	186	0.456412	0.259963	ILMN_1694810	56666	PANX2	pannexin 2 (PANX2), mRNA.	PANX2	chr22:50648189	hg19_cpg_shelves	4	SELENOO	hg19_genes_introns	Strong transcription	Weak transcription	Strong transcription	rs753716012		rs753716012	+	G	G	A/G	unknown	0	0	chr22:50648189	-	25.8441	9.43097
chr17:72528749	ILMN_1693552	17	72462521	72480937	CD300A	-0.274697	0.0596135	6.81106e-06	0.0243638	-0.32068	1.253e-06	0.0144125	219	0.619645	0.214	ILMN_1693552	11314	CD300A	CD300a molecule (CD300A), mRNA.	CD300A	chr17:72528749	hg19_cpg_inter	2	CD300LB	hg19_genes_1to5kb	Flanking Active TSS	Weak Repressed PolyComb	Weak Repressed PolyComb	none	rs1344037232(1bp)	none		NA	NA	No SNP				chr17:72528749	+	38.2831	14.2533
chr2:25384586	ILMN_1672899	2	25383721	25391559	POMC	-0.221335	0.0470567	4.46064e-06	0.0177523	-0.32066	9.092e-06	0.0655044	184	0.236096	0.225902	ILMN_1672899	5443	POMC	proopiomelanocortin (POMC), transcript variant 1, mRNA.	POMC	chr2:25384586	hg19_cpg_islands	6	POMC	hg19_genes_exons	Flanking Active TSS	Active TSS	Active TSS	rs777627899		rs777627899	+	G	G	A/C/G/T	by-frequency	0.00012	0.007742	chr2:25384586	-	25.3641	8.67022
chr22:50981136	ILMN_3223126	22	50964180	50968514	TYMP	-0.341806	0.068093	1.05173e-06	0.0058749	-0.3196	7.382e-07	0.00972767	230	0.70004	0.156844	ILMN_3223126	1890	TYMP	thymidine phosphorylase (TYMP), transcript variant 3, mRNA.	TYMP	chr22:50981136	hg19_cpg_shores	1		hg19_genes_intergenic	Weak transcription	Enhancers	Enhancers	rs1323606916		rs1323606916	+	C	C	C/T	unknown	0	0	chr22:50981136	+	88.9826	25.9855
chr18:74818424	ILMN_2331544	18	74690788	74844774	MBP	-0.132504	0.0295437	1.16248e-05	0.0349361	-0.319	1.895e-06	0.0194796	214	0.575973	0.239014	ILMN_2331544	4155	MBP	myelin basic protein (MBP), transcript variant 7, mRNA.	MBP	chr18:74818424	hg19_cpg_inter	2	MBP	hg19_genes_introns	Enhancers	Weak transcription	Enhancers	rs765506737		rs765506737	+	C	C	C/T	by-cluster	0	0	chr18:74818424	+	33.5794	12.9459
chr6:168443229	ILMN_1676679	6	168418552	168445769	KIF25	-0.928183	0.192697	2.67997e-06	0.0121166	-0.31866	5.028e-06	0.0425921	197	0.857044	0.154483	ILMN_1676679	3834	KIF25	kinesin family member 25 (KIF25), transcript variant 2, mRNA.	KIF25	chr6:168443229	hg19_cpg_inter	3	KIF25	hg19_genes_intronexonboundaries	Active TSS	Quiescent/Low	Weak Repressed PolyComb	rs766598398		rs766598398	+	G	G	A/G	by-frequency	3.4e-05	0.004104	chr6:168443229	-	32.0711	13.7371
chr8:600111	ILMN_1731001	8	614199	681226	ERICH1	-0.157431	0.0344362	7.98442e-06	0.0268686	-0.31805	1.4e-05	0.0890028	179	0.806077	0.221511	ILMN_1731001	157697	ERICH1	glutamate-rich 1 (ERICH1), mRNA.	ERICH1	chr8:600111	hg19_cpg_islands	1		hg19_genes_intergenic	Weak transcription	Weak transcription	Weak transcription	rs1053198187		rs1053198187	+	C	C	C/T	unknown	0	0	chr8:600111	+	24.9944	9.28058
chr8:600125	ILMN_1731001	8	614199	681226	ERICH1	-0.212403	0.037121	3.33942e-08	0.000401862	-0.31704	4.282e-06	0.0379402	202	0.861102	0.189499	ILMN_1731001	157697	ERICH1	glutamate-rich 1 (ERICH1), mRNA.	ERICH1	chr8:600125	hg19_cpg_islands	1		hg19_genes_intergenic	Weak transcription	Weak transcription	Weak transcription	rs1303370021		rs1303370021	+	C	C	C/T	unknown	0	0	chr8:600125	+	28.9158	10.5829
chr2:25384558	ILMN_2403664	2	25383721	25391559	POMC	-0.219435	0.0487615	1.08893e-05	0.0336437	-0.31579	1e-05	0.0696641	188	0.157822	0.151438	ILMN_2403664	5443	POMC	proopiomelanocortin (POMC), transcript variant 1, mRNA.	POMC	chr2:25384558	hg19_cpg_islands	6	POMC	hg19_genes_exons	Flanking Active TSS	Active TSS	Active TSS	rs1427018985		rs1427018985	+	C	C	C/T	unknown	0	0	chr2:25384558	+	27.8511	10.0575
chr4:57773325	ILMN_1665066	4	57829515	57843826	C4orf14	-0.182288	0.0393771	6.20114e-06	0.0225482	-0.31563	2.1e-05	0.114965	175	0.184403	0.185902	ILMN_1665066	84273	C4orf14	chromosome 4 open reading frame 14 (C4orf14), mRNA.	NOA1	chr4:57773325	hg19_cpg_shores	29	REST	hg19_genes_promoters	Flanking Active TSS	Flanking Active TSS	Flanking Bivalent TSS/Enh	none	rs1160126347(1bp)	none		NA	NA	No SNP				chr4:57773325	+	28.5371	11.9061
chr7:45068297	ILMN_1692295	7	45002259	45018704	MYO1G	-0.406597	0.0779715	4.16848e-07	0.00289488	-0.31533	1.054e-06	0.0127937	230	0.724078	0.123823	ILMN_1692295	64005	MYO1G	myosin IG (MYO1G), mRNA.	MYO1G	chr7:45068297	hg19_cpg_inter	7	CCM2	hg19_genes_introns	Active TSS	Strong transcription	Weak transcription	rs979454090		rs979454090	+	C	C	C/T	unknown	0	0	chr7:45068297	+	145.113	42.4625
chr5:134364060	ILMN_1674386	5	134363423	134369964	PITX1	0.123447	0.0258712	3.28788e-06	0.0141198	0.31531	9.9e-06	0.0693627	189	0.332585	0.232823	ILMN_1674386	5307	PITX1	paired-like homeodomain transcription factor 1 (PITX1), mRNA.	PITX1	chr5:134364060	hg19_cpg_islands	3	PITX1	hg19_genes_exons	Repressed PolyComb	Repressed PolyComb	Repressed PolyComb	none	rs1007610854(2bp)	none		NA	NA	No SNP				chr5:134364060	+	27.3545	9.00746
chr22:37608846	ILMN_1709795	22	37621300	37640339	RAC2	0.649825	0.137679	4.14793e-06	0.0166535	0.31529	1.6e-05	0.0970906	180	0.334848	0.231206	ILMN_1709795	5880	RAC2	ras-related C3 botulinum toxin substrate 2 (rho family, small GTP binding protein Rac2) (RAC2), mRNA.	RAC2	chr22:37608846	hg19_cpg_inter	2	SSTR3	hg19_genes_promoters	Enhancers	Bivalent Enhancer	Bivalent Enhancer	rs1028846778		rs1028846778	+	C	C	C/G/T	unknown	0	0	chr22:37608846	+	25.6278	9.3271
chr1:161349130	ILMN_2323366	1	161284165	161334535	SDHC	0.160492	0.0293482	1.2031e-07	0.00111069	0.31482	1.1e-06	0.0131177	230	0.594074	0.228979	ILMN_2323366	6391	SDHC	succinate dehydrogenase complex, subunit C, integral membrane protein, 15kDa (SDHC), nuclear gene encoding mitochondrial protein, transcript variant 4, mRNA.	SDHC	chr1:161349130	hg19_cpg_inter	1		hg19_genes_intergenic	Quiescent/Low	Active TSS	Active TSS	rs1305450332		rs1305450332	+	C	C	C/T	unknown	0	0	chr1:161349130	+	78.4522	27.0833
chr2:207104782	ILMN_1694587	2	207024317	207027653	EEF1B2	0.296172	0.063088	4.64306e-06	0.018261	0.31459	1.4e-05	0.0890028	183	0.523675	0.238371	ILMN_1694587	1933	EEF1B2	eukaryotic translation elongation factor 1 beta 2 (EEF1B2), transcript variant 1, mRNA.	EEF1B2	chr2:207104782	hg19_cpg_inter	0			Weak Repressed PolyComb	Weak Repressed PolyComb	Quiescent/Low	rs985132010		rs985132010	+	G	G	A/G	unknown	0	0	chr2:207104782	-	28.3716	11.3498
chr16:31488822	ILMN_2254635	16	31366454	31394318	ITGAX	-0.445143	0.0971675	7.65865e-06	0.0261808	-0.31429	4.696e-06	0.0409026	204	0.659779	0.228651	ILMN_2254635	3687	ITGAX	integrin, alpha X (complement component 3 receptor 4 subunit) (ITGAX), mRNA.	ITGAX	chr16:31488822	hg19_cpg_islands	6	TGFB1I1	hg19_genes_exons	Strong transcription	Weak transcription	Strong transcription	none	rs1225123394(1bp)	none		NA	NA	No SNP				chr16:31488822	-	30.5392	11.6168
chr8:600147	ILMN_2104696	8	614199	681226	ERICH1	-0.258971	0.0463136	6.48535e-08	0.000684837	-0.3138	5.727e-06	0.0473763	201	0.862768	0.186374	ILMN_2104696	157697	ERICH1	glutamate-rich 1 (ERICH1), mRNA.	ERICH1	chr8:600147	hg19_cpg_islands	1		hg19_genes_intergenic	Weak transcription	Weak transcription	Weak transcription	rs1022094236		rs1022094236	+	C	C	C/G/T	unknown	0	0	chr8:600147	+	28.9901	10.566
chr7:45068283	ILMN_1692295	7	45002259	45018704	MYO1G	-0.376627	0.0743743	8.54416e-07	0.00506644	-0.31279	1.299e-06	0.0147312	230	0.679523	0.130322	ILMN_1692295	64005	MYO1G	myosin IG (MYO1G), mRNA.	MYO1G	chr7:45068283	hg19_cpg_inter	7	CCM2	hg19_genes_introns	Active TSS	Strong transcription	Weak transcription	rs931773511		rs931773511	+	C	C	C/T	unknown	0	0	chr7:45068283	+	145.461	42.5276
chr4:111562267	ILMN_2391400	4	111538579	111563279	PITX2	0.19818	0.0341596	2.21325e-08	0.000294157	0.31241	1.341e-06	0.0150908	230	0.21195	0.120543	ILMN_2391400	5308	PITX2	paired-like homeodomain 2 (PITX2), transcript variant 1, mRNA.	PITX2	chr4:111562267	hg19_cpg_shores	5	PITX2	hg19_genes_introns	Repressed PolyComb	Repressed PolyComb	Repressed PolyComb	none	rs1373927885(1bp)	none		NA	NA	No SNP				chr4:111562267	-	103.061	30.0373
chr5:1865719	ILMN_1800197	5	1798498	1799956	MRPL36	0.224291	0.0471681	3.54084e-06	0.0148342	0.31211	1.9e-05	0.10737	181	0.852946	0.1635	ILMN_1800197	64979	MRPL36	mitochondrial ribosomal protein L36 (MRPL36), nuclear gene encoding mitochondrial protein, mRNA.	MRPL36	chr5:1865719	hg19_cpg_inter	1		hg19_genes_intergenic	Repressed PolyComb	Repressed PolyComb	Repressed PolyComb	none	rs937624102(1bp)	none		NA	NA	No SNP				chr5:1865719	-	27.9779	11.5729
chr11:841624	ILMN_1661589	11	832951	838835	CD151	-0.434043	0.0958091	9.55961e-06	0.030457	-0.31104	1.853e-06	0.0193776	226	0.655058	0.199966	ILMN_1661589	977	CD151	CD151 molecule (Raph blood group) (CD151), transcript variant 4, mRNA.	CD151	chr11:841624	hg19_cpg_shores	8	POLR2L	hg19_genes_introns	Flanking Active TSS	Active TSS	Active TSS	none	rs971265534(4bp)	none		NA	NA	No SNP				chr11:841624	+	46.854	16.6995
chr12:4390092	ILMN_1667081	12	4382901	4414522	CCND2	0.590973	0.128598	7.1935e-06	0.0251483	0.31017	6.341e-06	0.0510647	204	0.381117	0.228043	ILMN_1667081	894	CCND2	cyclin D2 (CCND2), mRNA.	CCND2	chr12:4390092	hg19_cpg_inter	1	CCND2	hg19_genes_introns	Genic enhancers	Flanking Active TSS	Genic enhancers	rs1172421733		rs1172421733	+	G	G	A/G	unknown	0	0	chr12:4390092	-	33.451	11.9342
chr11:17034710	ILMN_1777344	11	17095938	17099220	RPS13	-0.15682	0.0342058	7.54527e-06	0.0260188	-0.31009	3.5e-05	0.157736	172	0.239591	0.218192	ILMN_1777344	6207	RPS13	ribosomal protein S13 (RPS13), mRNA.	RPS13	chr11:17034710	hg19_cpg_shores	2	PLEKHA7	hg19_genes_introns	Flanking Active TSS	Active TSS	Bivalent/Poised TSS	rs80221593		rs80221593	+	C	C	C/T	by-cluster,by-frequency,by-1000genomes	0.057734	0.159793	chr11:17034710	+	25.4942	9.35305
chr2:25384598	ILMN_1672899	2	25383721	25391559	POMC	-0.227891	0.0507981	1.15648e-05	0.0349086	-0.30994	1.8e-05	0.103024	185	0.204002	0.209117	ILMN_1672899	5443	POMC	proopiomelanocortin (POMC), transcript variant 1, mRNA.	POMC	chr2:25384598	hg19_cpg_islands	6	POMC	hg19_genes_exons	Flanking Active TSS	Active TSS	Active TSS	none	rs747250245(1bp)	none		NA	NA	No SNP				chr2:25384598	-	25.3135	8.68526
chr11:1051276	ILMN_1803779	11	925808	1012245	AP2A2	0.178345	0.0354	9.65172e-07	0.00556548	0.3099	7.576e-06	0.058111	201	0.119976	0.184004	ILMN_1803779	161	AP2A2	adaptor-related protein complex 2, alpha 2 subunit (AP2A2), mRNA.	AP2A2	chr11:1051276	hg19_cpg_inter	1		hg19_genes_intergenic	Weak Repressed PolyComb	Weak Repressed PolyComb	Repressed PolyComb	rs908700092		rs908700092	+	C	C	C/T	unknown	0	0	chr11:1051276	+	28.9552	11.031
chr8:600115	ILMN_1731001	8	614199	681226	ERICH1	-0.156061	0.0347479	1.13173e-05	0.0344146	-0.30969	2.5e-05	0.126216	179	0.804822	0.221051	ILMN_1731001	157697	ERICH1	glutamate-rich 1 (ERICH1), mRNA.	ERICH1	chr8:600115	hg19_cpg_islands	1		hg19_genes_intergenic	Weak transcription	Weak transcription	Weak transcription	none	rs1008071601(1bp)	none		NA	NA	No SNP				chr8:600115	+	25.0168	9.32224
chr11:118081887	ILMN_1778723	11	118064441	118084074	AMICA1	0.414207	0.0782038	2.80566e-07	0.00212037	0.30952	2.9e-05	0.142648	176	0.294744	0.259367	ILMN_1778723	120425	AMICA1	adhesion molecule, interacts with CXADR antigen 1 (AMICA1), mRNA.	AMICA1	chr11:118081887	hg19_cpg_inter	7	JAML	hg19_genes_introns	Weak transcription	Bivalent Enhancer	Bivalent Enhancer	rs560831492		rs560831492	+	C	C	C/T	by-1000genomes	0.000399	0.014124	chr11:118081887	+	26.0966	9.69635
chr2:25384365	ILMN_2403664	2	25383721	25391559	POMC	-0.15685	0.0334842	4.8607e-06	0.0188884	-0.30917	1.9e-05	0.106319	185	0.347944	0.225787	ILMN_2403664	5443	POMC	proopiomelanocortin (POMC), transcript variant 1, mRNA.	POMC	chr2:25384365	hg19_cpg_islands	3	POMC	hg19_genes_exons	Flanking Active TSS	Active TSS	Active TSS	none	rs780824193(1bp)	none		NA	NA	No SNP				chr2:25384365	-	25.9622	10.0127
chr2:25384356	ILMN_1672899	2	25383721	25391559	POMC	-0.217682	0.0481452	9.93622e-06	0.0313912	-0.30804	1.1e-05	0.072304	197	0.283938	0.219336	ILMN_1672899	5443	POMC	proopiomelanocortin (POMC), transcript variant 1, mRNA.	POMC	chr2:25384356	hg19_cpg_islands	3	POMC	hg19_genes_exons	Flanking Active TSS	Active TSS	Active TSS	rs1199953669		rs1199953669	+	C	C	C/G/T	unknown	0	0	chr2:25384356	+	27.7411	10.5274
chr11:63974842	ILMN_1740960	11	63766029	63933585	MACROD1	0.153695	0.0316495	2.24031e-06	0.0105625	0.30777	4.97e-06	0.0423477	212	0.346758	0.2198	ILMN_1740960	28992	MACROD1	MACRO domain containing 1 (MACROD1), mRNA.	MACROD1	chr11:63974842	hg19_cpg_islands	4	FERMT3	hg19_genes_exons	Active TSS	Flanking Active TSS	Flanking Active TSS	rs767213325		rs767213325	+	G	G	A/G	by-frequency	5e-05	0.004984	chr11:63974842	-	36.5566	14.2307
chr6:168443229	ILMN_1665903	6	168418552	168445769	KIF25	-0.937527	0.196347	3.24031e-06	0.0140398	-0.30656	1.2e-05	0.0773603	197	0.857044	0.154483	ILMN_1665903	3834	KIF25	kinesin family member 25 (KIF25), transcript variant 1, mRNA.		chr6:168443229	hg19_cpg_inter	3	KIF25	hg19_genes_intronexonboundaries	Active TSS	Quiescent/Low	Weak Repressed PolyComb	rs766598398		rs766598398	+	G	G	A/G	by-frequency	3.4e-05	0.004104	chr6:168443229	-	32.0711	13.7371
chr16:31488818	ILMN_2254635	16	31366454	31394318	ITGAX	-0.4224	0.0917852	6.99017e-06	0.0247745	-0.30612	8.479e-06	0.062847	204	0.662396	0.24101	ILMN_2254635	3687	ITGAX	integrin, alpha X (complement component 3 receptor 4 subunit) (ITGAX), mRNA.	ITGAX	chr16:31488818	hg19_cpg_islands	6	TGFB1I1	hg19_genes_exons	Strong transcription	Weak transcription	Strong transcription	none	rs371811052(1bp)	none		NA	NA	No SNP				chr16:31488818	-	30.598	11.66
chr21:47580685	ILMN_1658271	21	47609037	47648738	LSS	-0.115668	0.0187683	3.26377e-09	6.04966e-05	-0.30566	3.666e-06	0.0330525	221	0.761508	0.302741	ILMN_1658271	4047	LSS	lanosterol synthase (2,3-oxidosqualene-lanosterol cyclase) (LSS), transcript variant 1, mRNA.	LSS	chr21:47580685	hg19_cpg_islands	1		hg19_genes_intergenic	Quiescent/Low	Quiescent/Low	Weak transcription	rs1055278315		rs1055278315	+	G	G	A/G	unknown	0	0	chr21:47580685	-	34.6606	12.0536
chr20:42875822	ILMN_1802434	20	42805456	42816218	JPH2	0.215864	0.0480295	1.11639e-05	0.0341831	0.30492	3.7e-05	0.162506	177	0.106182	0.137957	ILMN_1802434	57158	JPH2	junctophilin 2 (JPH2), transcript variant 2, mRNA.		chr20:42875822	hg19_cpg_islands	8	GDAP1L1	hg19_genes_promoters	Flanking Active TSS	Bivalent/Poised TSS	Bivalent/Poised TSS	none	rs1354603294(1bp)	none		NA	NA	No SNP				chr20:42875822	-	24.8701	8.41941
chr1:161008389	ILMN_3197097	1	161007421	161008774	TSTD1	-0.41082	0.0806437	7.40477e-07	0.00458478	-0.30482	2.74e-06	0.025767	228	0.506209	0.200144	ILMN_3197097	100131187	TSTD1	thiosulfate sulfurtransferase (rhodanese)-like domain containing 1 (TSTD1), transcript variant 2, mRNA.	TSTD1	chr1:161008389	hg19_cpg_islands	7	TSTD1	hg19_genes_exons	Transcr. at gene 5' and 3'	Weak transcription	Active TSS	rs1458874000		rs1458874000	+	GA	GA	-/GA	unknown	0	0	chr1:161008389	-	41.136	15.7126
chr5:134364040	ILMN_1674386	5	134363423	134369964	PITX1	0.138244	0.0295621	5.03455e-06	0.0192557	0.30391	2.1e-05	0.11497	189	0.304645	0.204726	ILMN_1674386	5307	PITX1	paired-like homeodomain transcription factor 1 (PITX1), mRNA.	PITX1	chr5:134364040	hg19_cpg_islands	3	PITX1	hg19_genes_exons	Repressed PolyComb	Repressed PolyComb	Repressed PolyComb	none	rs1239300288(2bp)	none		NA	NA	No SNP				chr5:134364040	+	27.254	8.98989
chr7:45002811	ILMN_1692295	7	45002259	45018704	MYO1G	0.273063	0.053654	7.57933e-07	0.00467409	0.30374	1e-05	0.0693627	204	0.226709	0.189404	ILMN_1692295	64005	MYO1G	myosin IG (MYO1G), mRNA.	MYO1G	chr7:45002811	hg19_cpg_islands	6	MYO1G	hg19_genes_intronexonboundaries	Repressed PolyComb	Weak Repressed PolyComb	Repressed PolyComb	rs1034158447		rs1034158447	+	G	G	A/G	unknown	0	0	chr7:45002811	-	30.1814	10.4132
chr22:50981136	ILMN_2109708	22	50964180	50968514	ECGF1	-0.605922	0.126126	2.8387e-06	0.0126855	-0.30368	2.71e-06	0.025767	230	0.70004	0.156844	ILMN_2109708	1890	ECGF1	endothelial cell growth factor 1 (platelet-derived) (ECGF1), mRNA.	TYMP	chr22:50981136	hg19_cpg_shores	1		hg19_genes_intergenic	Weak transcription	Enhancers	Enhancers	rs1323606916		rs1323606916	+	C	C	C/T	unknown	0	0	chr22:50981136	+	88.9826	25.9855
chr8:144420098	ILMN_2405628	8	144391496	144417061	TOP1MT	0.204047	0.0427403	3.25103e-06	0.0140398	0.30338	2.774e-06	0.025767	230	0.43067	0.20839	ILMN_2405628	116447	TOP1MT	topoisomerase (DNA) I, mitochondrial (TOP1MT), nuclear gene encoding mitochondrial protein, mRNA.	TOP1MT	chr8:144420098	hg19_cpg_shelves	4	TOP1MT	hg19_genes_introns	Weak Repressed PolyComb	Weak Repressed PolyComb	Weak Repressed PolyComb	rs542796379		rs542796379	+	G	G	A/G	by-1000genomes	0.000399	0.014124	chr8:144420098	-	51.8652	17.3234
chr2:160638816	ILMN_1716797	2	160625138	160654766	CD302	0.172416	0.0343478	1.05167e-06	0.0058749	0.30306	6.359e-06	0.0510647	214	0.433138	0.366863	ILMN_1716797	9936	CD302	CD302 molecule (CD302), mRNA.	CD302,LY75-CD302	chr2:160638816	hg19_cpg_inter	5	CD302	hg19_genes_introns	Weak transcription	Weak transcription	Weak transcription	none	rs12465980(1bp)	none		NA	NA	No SNP				chr2:160638816	+	40.1542	15.9114
chr9:107547804	ILMN_1786308	9	107526450	107536291	NIPSNAP3B	-0.244498	0.0558078	1.81103e-05	0.0478921	-0.30252	5.416e-06	0.0453777	218	0.640926	0.213583	ILMN_1786308	55335	NIPSNAP3B	nipsnap homolog 3B (C. elegans) (NIPSNAP3B), mRNA.	NIPSNAP3B	chr9:107547804	hg19_cpg_inter	3	ABCA1	hg19_genes_exons	Genic enhancers	Strong transcription	Strong transcription	rs375968445		rs375968445	+	C	C	C/T	by-cluster	1.6e-05	0.002871	chr9:107547804	+	35.6972	13.9938
chr22:50981136	ILMN_3297126	22	50964180	50968514	TYMP	-0.236738	0.0531043	1.30556e-05	0.0379534	-0.30166	3.179e-06	0.0293505	230	0.70004	0.156844	ILMN_3297126	1890	TYMP	thymidine phosphorylase (TYMP), transcript variant 1, mRNA.	TYMP	chr22:50981136	hg19_cpg_shores	1		hg19_genes_intergenic	Weak transcription	Enhancers	Enhancers	rs1323606916		rs1323606916	+	C	C	C/T	unknown	0	0	chr22:50981136	+	88.9826	25.9855
chr6:168444765	ILMN_1676679	6	168418552	168445769	KIF25	-0.946796	0.211562	1.21224e-05	0.0359554	-0.30107	4.949e-06	0.0423477	222	0.883554	0.130163	ILMN_1676679	3834	KIF25	kinesin family member 25 (KIF25), transcript variant 2, mRNA.	KIF25	chr6:168444765	hg19_cpg_inter	2	KIF25	hg19_genes_introns	Active TSS	Quiescent/Low	Weak Repressed PolyComb	rs146243623		rs146243623	+	C	C	C/T	by-frequency,by-1000genomes	0.000798	0.019964	chr6:168444765	+	35.7973	12.19
chr1:161256427	ILMN_2123743	1	161185086	161189038	FCER1G	-1.29096	0.264415	1.9873e-06	0.00960459	-0.29957	7.447e-06	0.0574075	216	0.712897	0.10752	ILMN_2123743	2207	FCER1G	Fc fragment of IgE, high affinity I, receptor for; gamma polypeptide (FCER1G), mRNA.	FCER1G	chr1:161256427	hg19_cpg_inter	1		hg19_genes_intergenic	Weak transcription	Weak Repressed PolyComb	Weak Repressed PolyComb	rs947207432		rs947207432	+	G	G	A/G	unknown	0	0	chr1:161256427	-	338.764	94.3914
chr12:4390092	ILMN_2067656	12	4382901	4414522	CCND2	0.587072	0.130469	1.09111e-05	0.0336437	0.29887	1.4e-05	0.0880881	204	0.381117	0.228043	ILMN_2067656	894	CCND2	cyclin D2 (CCND2), mRNA.	CCND2	chr12:4390092	hg19_cpg_inter	1	CCND2	hg19_genes_introns	Genic enhancers	Flanking Active TSS	Genic enhancers	rs1172421733		rs1172421733	+	G	G	A/G	unknown	0	0	chr12:4390092	-	33.451	11.9342
chr11:63974831	ILMN_1740960	11	63766029	63933585	MACROD1	0.133098	0.0300384	1.46569e-05	0.0409348	0.29521	1.2e-05	0.0798681	212	0.381856	0.23621	ILMN_1740960	28992	MACROD1	MACRO domain containing 1 (MACROD1), mRNA.	MACROD1	chr11:63974831	hg19_cpg_islands	6	FERMT3	hg19_genes_5UTRs	Active TSS	Flanking Active TSS	Flanking Active TSS	rs1412649492		rs1412649492	+	G	G	A/G	unknown	0	0	chr11:63974831	-	36.5236	14.2248
chr19:49219101	ILMN_1755657	19	49223841	49243970	RASIP1	-0.299789	0.0665342	1.06288e-05	0.033124	-0.29382	1.2e-05	0.0798681	214	0.558845	0.209714	ILMN_1755657	54922	RASIP1	Ras interacting protein 1 (RASIP1), mRNA.	RASIP1	chr19:49219101	hg19_cpg_shores	5	MAMSTR	hg19_genes_5UTRs	Enhancers	Enhancers	Flanking Active TSS	rs776629321		rs776629321	+	C	C	C/T	unknown	0.000133	0.008155	chr19:49219101	+	29.5374	9.75407
chr1:153486751	ILMN_1688780	1	153516094	153518282	S100A4	-0.932186	0.210102	1.42919e-05	0.0402082	-0.29359	5.94e-06	0.0487117	230	0.728233	0.103598	ILMN_1688780	6275	S100A4	S100 calcium binding protein A4 (S100A4), transcript variant 2, mRNA.	S100A4	chr1:153486751	hg19_cpg_inter	1		hg19_genes_intergenic	Weak transcription	Quiescent/Low	Weak transcription	rs952042425		rs952042425	+	G	G	A/G	unknown	0	0	chr1:153486751	-	171.83	52.0357
chr16:31488850	ILMN_2254635	16	31366454	31394318	ITGAX	-0.403617	0.0900528	1.1776e-05	0.035253	-0.29328	2.1e-05	0.114408	204	0.654098	0.247982	ILMN_2254635	3687	ITGAX	integrin, alpha X (complement component 3 receptor 4 subunit) (ITGAX), mRNA.	ITGAX	chr16:31488850	hg19_cpg_islands	3	TGFB1I1	hg19_genes_exons	Strong transcription	Weak transcription	Strong transcription	none	rs746159490(1bp)	none		NA	NA	No SNP				chr16:31488850	-	30.6029	11.6861
chr1:161349134	ILMN_2323366	1	161284165	161334535	SDHC	0.143397	0.029488	2.17234e-06	0.010319	0.29207	6.67e-06	0.052465	230	0.580633	0.23106	ILMN_2323366	6391	SDHC	succinate dehydrogenase complex, subunit C, integral membrane protein, 15kDa (SDHC), nuclear gene encoding mitochondrial protein, transcript variant 4, mRNA.	SDHC	chr1:161349134	hg19_cpg_inter	1		hg19_genes_intergenic	Quiescent/Low	Active TSS	Active TSS	none	rs1217404500(1bp)	none		NA	NA	No SNP				chr1:161349134	+	78.6087	27.106
chr21:46378306	ILMN_1654396	21	46305867	46340965	ITGB2	0.812827	0.164056	1.42433e-06	0.00746915	0.29187	1.1e-05	0.0726449	220	0.384821	0.213922	ILMN_1654396	3689	ITGB2	integrin, beta 2 (antigen CD18 (p95), lymphocyte function-associated antigen 1; macrophage antigen 1 (mac-1) beta subunit) (ITGB2), mRNA.	ITGB2	chr21:46378306	hg19_cpg_islands	2	FAM207A	hg19_genes_introns	Transcr. at gene 5' and 3'	Enhancers	Enhancers	rs1186229431		rs1186229431	+	C	C	C/T	unknown	0	0	chr21:46378306	+	34.5682	12.0603
chr10:11784774	ILMN_2072178	10	11784355	11806065	ECHDC3	-0.863968	0.175657	1.68296e-06	0.0085071	-0.29183	1.9e-05	0.10737	208	0.0909401	0.133628	ILMN_2072178	79746	ECHDC3	enoyl Coenzyme A hydratase domain containing 3 (ECHDC3), mRNA.	ECHDC3	chr10:11784774	hg19_cpg_islands	2	ECHDC3	hg19_genes_introns	Active TSS	Active TSS	Bivalent/Poised TSS	rs997590124		rs997590124	+	C	C	A/C	unknown	0	0	chr10:11784774	+	31.7837	11.9049
chr17:80262627	ILMN_2364022	17	80186886	80197375	SLC16A3	0.768901	0.159154	2.51032e-06	0.0115529	0.29093	7.272e-06	0.056337	230	0.325565	0.107927	ILMN_2364022	9123	SLC16A3	solute carrier family 16, member 3 (monocarboxylic acid transporter 4) (SLC16A3), transcript variant 2, mRNA.	SLC16A3	chr17:80262627	hg19_cpg_inter	1		hg19_genes_intergenic	Weak Repressed PolyComb	Weak Repressed PolyComb	Weak Repressed PolyComb	rs183704579		rs183704579	+	G	G	A/G	by-cluster,by-frequency,by-1000genomes	0.000798	0.019964	chr17:80262627	-	165.804	45.1949
chr10:104211109	ILMN_1808566	10	104221169	104236802	TMEM180	-0.0701876	0.0155836	1.07144e-05	0.0332665	-0.29066	8.3e-05	0.269022	178	0.393036	0.245961	ILMN_1808566	79847	TMEM180	transmembrane protein 180 (TMEM180), mRNA.	TMEM180	chr10:104211109	hg19_cpg_shores	5	RPARP-AS1	hg19_genes_intronexonboundaries	Flanking Active TSS	Active TSS	Flanking Active TSS	rs746463039		rs746463039	+	G	G	A/G	unknown	1.8e-05	0.003033	chr10:104211109	-	27.1685	10.6206
chr1:44704059	ILMN_3247882	1	44686741	44820951	ERI3	-0.368227	0.0841782	1.86307e-05	0.0489327	-0.29005	4.7e-05	0.191195	191	0.0459788	0.100519	ILMN_3247882	79033	ERI3	ERI1 exoribonuclease family member 3 (ERI3), mRNA.	ERI3	chr1:44704059	hg19_cpg_inter	3	ERI3	hg19_genes_introns	Enhancers	Weak transcription	Enhancers	rs1160863963		rs1160863963	+	G	G	A/C/G/T	unknown	0	0	chr1:44704059	-	29.0052	10.3285
chr6:168442972	ILMN_1676679	6	168418552	168445769	KIF25	-0.713558	0.144848	1.6238e-06	0.0082896	-0.28971	1.4e-05	0.0868536	218	0.733914	0.192212	ILMN_1676679	3834	KIF25	kinesin family member 25 (KIF25), transcript variant 2, mRNA.	KIF25	chr6:168442972	hg19_cpg_inter	2	KIF25	hg19_genes_introns	Active TSS	Quiescent/Low	Heterochromatin	rs1189096626		rs1189096626	+	G	G	A/G	unknown	0	0	chr6:168442972	-	40.0551	14.617
chr7:45068309	ILMN_1784352	7	45067232	45116069	CCM2	-0.220503	0.0496682	1.41283e-05	0.0398818	-0.28961	3e-05	0.146299	201	0.659608	0.235526	ILMN_1784352	83605	CCM2	cerebral cavernous malformation 2 (CCM2), transcript variant 1, mRNA.	CCM2	chr7:45068309	hg19_cpg_inter	7	CCM2	hg19_genes_introns	Active TSS	Strong transcription	Weak transcription	rs112229277		rs112229277	+	G	G	A/G	unknown	0.5	0	chr7:45068309	-	30.0448	11.3909
chr6:168443213	ILMN_1665903	6	168418552	168445769	KIF25	-0.720444	0.160675	1.16831e-05	0.0350429	-0.28953	3.7e-05	0.162506	197	0.727868	0.187213	ILMN_1665903	3834	KIF25	kinesin family member 25 (KIF25), transcript variant 1, mRNA.		chr6:168443213	hg19_cpg_inter	3	KIF25	hg19_genes_intronexonboundaries	Active TSS	Quiescent/Low	Weak Repressed PolyComb	rs774802999		rs774802999	+	G	G	A/G	unknown	1.7e-05	0.002915	chr6:168443213	-	32.0609	13.7223
chr6:35286281	ILMN_2145280	6	35265594	35289548	DEF6	0.182253	0.0409819	1.36746e-05	0.0390132	0.28947	5.6e-05	0.212103	188	0.245032	0.213492	ILMN_2145280	50619	DEF6	differentially expressed in FDCP 6 homolog (mouse) (DEF6), mRNA.	DEF6	chr6:35286281	hg19_cpg_inter	4	DEF6	hg19_genes_intronexonboundaries	Flanking Active TSS	Active TSS	Active TSS	rs1279973143		rs1279973143	+	C	C	C/G	unknown	0	0	chr6:35286281	+	24.0053	7.99833
chr6:168443213	ILMN_1676679	6	168418552	168445769	KIF25	-0.70561	0.157857	1.24024e-05	0.0365604	-0.2891	3.8e-05	0.163562	197	0.727868	0.187213	ILMN_1676679	3834	KIF25	kinesin family member 25 (KIF25), transcript variant 2, mRNA.	KIF25	chr6:168443213	hg19_cpg_inter	3	KIF25	hg19_genes_intronexonboundaries	Active TSS	Quiescent/Low	Weak Repressed PolyComb	rs774802999		rs774802999	+	G	G	A/G	unknown	1.7e-05	0.002915	chr6:168443213	-	32.0609	13.7223
chr8:600147	ILMN_1731001	8	614199	681226	ERICH1	-0.211167	0.0381178	8.42223e-08	0.000827055	-0.28893	3.2e-05	0.150646	201	0.862768	0.186374	ILMN_1731001	157697	ERICH1	glutamate-rich 1 (ERICH1), mRNA.	ERICH1	chr8:600147	hg19_cpg_islands	1		hg19_genes_intergenic	Weak transcription	Weak transcription	Weak transcription	rs1022094236		rs1022094236	+	C	C	C/G/T	unknown	0	0	chr8:600147	+	28.9901	10.566
chr22:37608565	ILMN_3238196	22	37678494	37711389	CYTH4	0.539724	0.115051	4.71448e-06	0.0184947	0.28828	8.878e-06	0.0645181	230	0.234792	0.141917	ILMN_3238196	27128	CYTH4	cytohesin 4 (CYTH4), mRNA.	CYTH4	chr22:37608565	hg19_cpg_inter	2	SSTR3	hg19_genes_promoters	Weak Repressed PolyComb	Bivalent Enhancer	Repressed PolyComb	rs1005336413		rs1005336413	+	C	C	C/G	unknown	0	0	chr22:37608565	+	56.6826	16.6022
chr1:43296174	ILMN_2050023	1	43272722	43283059	CCDC23	-0.192334	0.0408783	4.43187e-06	0.0177014	-0.28825	2.3e-05	0.121414	209	0.830113	0.231334	ILMN_2050023	374969	CCDC23	coiled-coil domain containing 23 (CCDC23), mRNA.	CCDC23	chr1:43296174	hg19_cpg_inter	9	ERMAP	hg19_genes_5UTRs	Strong transcription	Weak transcription	Strong transcription	rs770533257		rs770533257	+	G	G	A/G	by-frequency	9.9e-05	0.007029	chr1:43296174	-	33.8852	13.8243
chr7:45002823	ILMN_1692295	7	45002259	45018704	MYO1G	0.223049	0.0486395	7.50744e-06	0.0260099	0.28794	3e-05	0.143329	204	0.252691	0.212756	ILMN_1692295	64005	MYO1G	myosin IG (MYO1G), mRNA.	MYO1G	chr7:45002823	hg19_cpg_islands	6	MYO1G	hg19_genes_intronexonboundaries	Repressed PolyComb	Weak Repressed PolyComb	Repressed PolyComb	rs1408568580		rs1408568580	+	G	G	A/G	unknown	0	0	chr7:45002823	-	30.1863	10.4148
chr22:37908752	ILMN_1687306	22	37966252	37976024	LGALS2	0.240295	0.044505	1.69559e-07	0.00146041	0.28791	9.552e-06	0.0681777	229	0.297327	0.18063	ILMN_1687306	3957	LGALS2	lectin, galactoside-binding, soluble, 2 (LGALS2), mRNA.	LGALS2	chr22:37908752	hg19_cpg_shelves	4	CARD10	hg19_genes_introns	Enhancers	Flanking Active TSS	Flanking Active TSS	rs953044703		rs953044703	+	C	C	C/T	unknown	0	0	chr22:37908752	+	46.8559	16.7374
chr1:235184247	ILMN_3251472	1	235272657	235292256	TOMM20	-0.168796	0.0378842	1.31906e-05	0.0381543	-0.28716	1.7e-05	0.0986991	218	0.438894	0.222452	ILMN_3251472	9804	TOMM20	translocase of outer mitochondrial membrane 20 homolog (yeast) (TOMM20), nuclear gene encoding mitochondrial protein, mRNA.	TOMM20	chr1:235184247	hg19_cpg_inter	1		hg19_genes_intergenic	Enhancers	Weak transcription	Enhancers	none	rs566918891(15bp)	none		NA	NA	No SNP				chr1:235184247	+	34.1422	11.9532
chr6:168444765	ILMN_1665903	6	168418552	168445769	KIF25	-0.942643	0.215814	1.91506e-05	0.0495385	-0.28715	1.4e-05	0.0868536	222	0.883554	0.130163	ILMN_1665903	3834	KIF25	kinesin family member 25 (KIF25), transcript variant 1, mRNA.		chr6:168444765	hg19_cpg_inter	2	KIF25	hg19_genes_introns	Active TSS	Quiescent/Low	Weak Repressed PolyComb	rs146243623		rs146243623	+	C	C	C/T	by-frequency,by-1000genomes	0.000798	0.019964	chr6:168444765	+	35.7973	12.19
chr22:50981136	ILMN_1690939	22	50964180	50968514	ECGF1	-0.214612	0.0478332	1.15414e-05	0.0349086	-0.28697	9.79e-06	0.0693627	230	0.70004	0.156844	ILMN_1690939	1890	ECGF1	endothelial cell growth factor 1 (platelet-derived) (ECGF1), mRNA.	TYMP	chr22:50981136	hg19_cpg_shores	1		hg19_genes_intergenic	Weak transcription	Enhancers	Enhancers	rs1323606916		rs1323606916	+	C	C	C/T	unknown	0	0	chr22:50981136	+	88.9826	25.9855
chr6:168442972	ILMN_1665903	6	168418552	168445769	KIF25	-0.694471	0.148156	4.79365e-06	0.0187576	-0.28662	1.7e-05	0.101777	218	0.733914	0.192212	ILMN_1665903	3834	KIF25	kinesin family member 25 (KIF25), transcript variant 1, mRNA.		chr6:168442972	hg19_cpg_inter	2	KIF25	hg19_genes_introns	Active TSS	Quiescent/Low	Heterochromatin	rs1189096626		rs1189096626	+	G	G	A/G	unknown	0	0	chr6:168442972	-	40.0551	14.617
chr22:36596206	ILMN_1779070	22	36585175	36600879	APOL4	-0.233233	0.0460691	8.59529e-07	0.00507723	-0.28622	3.2e-05	0.150646	205	0.917677	0.120738	ILMN_1779070	80832	APOL4	apolipoprotein L, 4 (APOL4), transcript variant a, mRNA.	APOL4	chr22:36596206	hg19_cpg_inter	4	APOL4	hg19_genes_introns	Enhancers	Quiescent/Low	Weak transcription	rs986898063		rs986898063	+	G	G	A/G/T	unknown	0	0	chr22:36596206	-	30.1317	10.4561
chr21:46378306	ILMN_2175912	21	46305867	46340965	ITGB2	0.797528	0.164515	2.32784e-06	0.0109345	0.28582	1.7e-05	0.0988727	220	0.384821	0.213922	ILMN_2175912	3689	ITGB2	integrin, beta 2 (complement component 3 receptor 3 and 4 subunit) (ITGB2), mRNA.	ITGB2	chr21:46378306	hg19_cpg_islands	2	FAM207A	hg19_genes_introns	Transcr. at gene 5' and 3'	Enhancers	Enhancers	rs1186229431		rs1186229431	+	C	C	C/T	unknown	0	0	chr21:46378306	+	34.5682	12.0603
chr6:33174719	ILMN_1753534	6	33239851	33244281	RPS18	-0.294558	0.0664842	1.46829e-05	0.0409348	-0.28557	1.2e-05	0.0775494	228	0.53589	0.173584	ILMN_1753534	6222	RPS18	ribosomal protein S18 (RPS18), mRNA.	RPS18	chr6:33174719	hg19_cpg_shores	5	MIR219A1	hg19_genes_promoters	Weak transcription	Weak transcription	Enhancers	rs1419995286		rs1419995286	+	CCG	CCG	-/CCG	unknown	0	0	chr6:33174719	-	58.4254	19.7965
chr19:6744959	ILMN_1655414	19	6663147	6670599	TNFSF14	0.124329	0.0253957	1.86926e-06	0.00914885	0.28493	1.8e-05	0.103263	220	0.335047	0.214398	ILMN_1655414	8740	TNFSF14	tumor necrosis factor (ligand) superfamily, member 14 (TNFSF14), transcript variant 1, mRNA.	TNFSF14	chr19:6744959	hg19_cpg_shores	8	TRIP10	hg19_genes_exons	Transcr. at gene 5' and 3'	Flanking Active TSS	Enhancers	rs769300556		rs769300556	+	C	C	C/T	by-frequency	6.8e-05	0.005809	chr19:6744959	+	33.6	12.775
chr1:161349160	ILMN_2323366	1	161284165	161334535	SDHC	0.148796	0.0310026	2.89895e-06	0.0129173	0.28367	1.3e-05	0.0799721	230	0.559062	0.220309	ILMN_2323366	6391	SDHC	succinate dehydrogenase complex, subunit C, integral membrane protein, 15kDa (SDHC), nuclear gene encoding mitochondrial protein, transcript variant 4, mRNA.	SDHC	chr1:161349160	hg19_cpg_inter	1		hg19_genes_intergenic	Quiescent/Low	Active TSS	Active TSS	none	rs951442316(1bp)	none		NA	NA	No SNP				chr1:161349160	+	78.4565	27.0561
chr1:153486751	ILMN_1684306	1	153516094	153518282	S100A4	-0.966982	0.216286	1.23549e-05	0.0364901	-0.28349	1.3e-05	0.0806705	230	0.728233	0.103598	ILMN_1684306	6275	S100A4	S100 calcium binding protein A4 (S100A4), transcript variant 2, mRNA.	S100A4	chr1:153486751	hg19_cpg_inter	1		hg19_genes_intergenic	Weak transcription	Quiescent/Low	Weak transcription	rs952042425		rs952042425	+	G	G	A/G	unknown	0	0	chr1:153486751	-	171.83	52.0357
chr6:168390882	ILMN_1676679	6	168418552	168445769	KIF25	2.51697	0.49631	8.25041e-07	0.00493017	0.28306	2.4e-05	0.124501	216	0.96117	0.055315	ILMN_1676679	3834	KIF25	kinesin family member 25 (KIF25), transcript variant 2, mRNA.	KIF25	chr6:168390882	hg19_cpg_islands	1		hg19_genes_intergenic	Weak transcription	Weak Repressed PolyComb	Weak transcription	rs1016900397		rs1016900397	+	G	G	A/G	unknown	0	0	chr6:168390882	-	153.806	108.413
chr19:49219075	ILMN_1755657	19	49223841	49243970	RASIP1	-0.275878	0.06272	1.68178e-05	0.0453268	-0.283	2.6e-05	0.131635	214	0.48907	0.222578	ILMN_1755657	54922	RASIP1	Ras interacting protein 1 (RASIP1), mRNA.	RASIP1	chr19:49219075	hg19_cpg_shores	5	MAMSTR	hg19_genes_5UTRs	Enhancers	Enhancers	Flanking Active TSS	rs1405396283		rs1405396283	+	C	C	C/T	unknown	0	0	chr19:49219075	+	29.4346	9.76979
chr6:168390882	ILMN_1665903	6	168418552	168445769	KIF25	2.6692	0.502842	2.64987e-07	0.00203252	0.28152	2.7e-05	0.133105	216	0.96117	0.055315	ILMN_1665903	3834	KIF25	kinesin family member 25 (KIF25), transcript variant 1, mRNA.		chr6:168390882	hg19_cpg_islands	1		hg19_genes_intergenic	Weak transcription	Weak Repressed PolyComb	Weak transcription	rs1016900397		rs1016900397	+	G	G	A/G	unknown	0	0	chr6:168390882	-	153.806	108.413
chr19:2177670	ILMN_1697701	19	2233154	2236328	PLEKHJ1	-0.193189	0.0435193	1.415e-05	0.0398818	-0.28037	1.8e-05	0.104506	227	0.911058	0.111515	ILMN_1697701	55111	PLEKHJ1	pleckstrin homology domain containing, family J member 1 (PLEKHJ1), mRNA.	PLEKHJ1	chr19:2177670	hg19_cpg_inter	1	DOT1L	hg19_genes_introns	Weak transcription	Weak transcription	Weak transcription	rs1436648251		rs1436648251	+	G	G	A/G	unknown	0	0	chr19:2177670	-	55.044	23.0984
chr13:113926948	ILMN_1788024	13	113831852	113863029	PCID2	0.481664	0.101317	3.55892e-06	0.0148648	0.28018	1.6e-05	0.0967565	230	0.76238	0.0854501	ILMN_1788024	55795	PCID2	PCI domain containing 2 (PCID2), mRNA.	PCID2	chr13:113926948	hg19_cpg_inter	1		hg19_genes_intergenic	Weak transcription	Enhancers	Genic enhancers	rs553867087		rs553867087	+	G	G	A/G	by-1000genomes	0.000399	0.014124	chr13:113926948	-	242.183	66.0308
chr16:89640906	ILMN_2082762	16	89627837	89627909	SNORD68	-0.119222	0.0270743	1.64683e-05	0.0447788	-0.2788	0.000112	0.319219	187	0.193498	0.175475	ILMN_2082762	606500	SNORD68	small nucleolar RNA, C/D box 68 (SNORD68), small nucleolar RNA.	SNORD68	chr16:89640906	hg19_cpg_shores	2	CPNE7	hg19_genes_1to5kb	Flanking Bivalent TSS/Enh	Enhancers	Bivalent Enhancer	rs1281000083		rs1281000083	+	C	C	C/G	unknown	0	0	chr16:89640906	+	26.9679	10.1149
chr22:50985742	ILMN_1701621	22	50961996	50964034	SCO2	0.196241	0.0441144	1.35983e-05	0.038968	0.27879	2.1e-05	0.114965	226	0.309938	0.206506	ILMN_1701621	9997	SCO2	SCO cytochrome oxidase deficient homolog 2 (yeast) (SCO2), nuclear gene encoding mitochondrial protein, mRNA.	SCO2	chr22:50985742	hg19_cpg_islands	1	KLHDC7B	hg19_genes_promoters	Repressed PolyComb	Weak Repressed PolyComb	Repressed PolyComb	none	rs1417486986(2bp)	none		NA	NA	No SNP				chr22:50985742	-	41.1195	13.775
chr22:22271664	ILMN_2235283	22	22123318	22221970	MAPK1	0.148596	0.0340432	1.93891e-05	0.0498211	0.27873	6.7e-05	0.236534	199	0.405476	0.235401	ILMN_2235283	5594	MAPK1	mitogen-activated protein kinase 1 (MAPK1), transcript variant 2, mRNA.	MAPK1	chr22:22271664	hg19_cpg_inter	1		hg19_genes_intergenic	Enhancers	Enhancers	Enhancers	rs547647818		rs547647818	+	C	C	C/T	by-1000genomes	0.000399	0.014124	chr22:22271664	+	27.8844	9.57067
chr6:35286307	ILMN_2145280	6	35265594	35289548	DEF6	0.202209	0.0417164	2.33339e-06	0.0109345	0.27825	0.000106	0.308514	189	0.229641	0.208669	ILMN_2145280	50619	DEF6	differentially expressed in FDCP 6 homolog (mouse) (DEF6), mRNA.	DEF6	chr6:35286307	hg19_cpg_inter	4	DEF6	hg19_genes_intronexonboundaries	Flanking Active TSS	Active TSS	Active TSS	none	rs1464333646(1bp)	none		NA	NA	No SNP				chr6:35286307	+	23.9524	8.08287
chr22:37666301	ILMN_1709795	22	37621300	37640339	RAC2	-0.661493	0.144209	7.46473e-06	0.0259202	-0.27614	2.8e-05	0.136019	224	0.658301	0.196208	ILMN_1709795	5880	RAC2	ras-related C3 botulinum toxin substrate 2 (rho family, small GTP binding protein Rac2) (RAC2), mRNA.	RAC2	chr22:37666301	hg19_cpg_inter	1		hg19_genes_intergenic	Weak Repressed PolyComb	Weak transcription	Weak transcription	rs1017063697		rs1017063697	+	C	C	C/T	unknown	0	0	chr22:37666301	+	47.2054	22.0125
chr1:161008387	ILMN_3197097	1	161007421	161008774	TSTD1	-0.408485	0.0877737	5.56369e-06	0.0207692	-0.27603	2.4e-05	0.122656	228	0.507788	0.184432	ILMN_3197097	100131187	TSTD1	thiosulfate sulfurtransferase (rhodanese)-like domain containing 1 (TSTD1), transcript variant 2, mRNA.	TSTD1	chr1:161008387	hg19_cpg_islands	7	TSTD1	hg19_genes_exons	Transcr. at gene 5' and 3'	Weak transcription	Active TSS	none	rs745803362(1bp)	none		NA	NA	No SNP				chr1:161008387	-	41.2719	15.5885
chr19:1465978	ILMN_1756469	19	1397024	1401569	GAMT	0.268426	0.0589757	8.71956e-06	0.0288793	0.27535	6.7e-05	0.236534	204	0.327893	0.235777	ILMN_1756469	2593	GAMT	guanidinoacetate N-methyltransferase (GAMT), transcript variant 1, mRNA.	GAMT	chr19:1465978	hg19_cpg_islands	5	APC2	hg19_genes_exons	Bivalent Enhancer	Weak Repressed PolyComb	Weak Repressed PolyComb	rs781314475		rs781314475	+	C	C	C/G/T	unknown	3.7e-05	0.004322	chr19:1465978	+	29.5294	10.6115
chr7:45002829	ILMN_1692295	7	45002259	45018704	MYO1G	0.246731	0.0517286	3.31589e-06	0.0142005	0.27466	7e-05	0.243302	204	0.190483	0.197433	ILMN_1692295	64005	MYO1G	myosin IG (MYO1G), mRNA.	MYO1G	chr7:45002829	hg19_cpg_islands	6	MYO1G	hg19_genes_intronexonboundaries	Repressed PolyComb	Weak Repressed PolyComb	Repressed PolyComb	rs1440425987		rs1440425987	+	G	G	A/G	unknown	0	0	chr7:45002829	-	30.0784	10.4005
chr7:45068298	ILMN_1784352	7	45067232	45116069	CCM2	-0.210737	0.047151	1.24308e-05	0.0365742	-0.27433	8.1e-05	0.266014	201	0.654145	0.246839	ILMN_1784352	83605	CCM2	cerebral cavernous malformation 2 (CCM2), transcript variant 1, mRNA.	CCM2	chr7:45068298	hg19_cpg_inter	7	CCM2	hg19_genes_introns	Active TSS	Strong transcription	Weak transcription	rs1033749239		rs1033749239	+	G	G	A/C/G	unknown	0	0	chr7:45068298	-	30.1194	11.3994
chr19:20829809	ILMN_1794823	19	20827508	20844402	ZNF626	0.104359	0.0201175	4.75089e-07	0.00321253	0.27237	8.4e-05	0.272229	203	0.880721	0.250123	ILMN_1794823	199777	ZNF626	zinc finger protein 626 (ZNF626), transcript variant 2, mRNA.	ZNF626	chr19:20829809	hg19_cpg_inter	3	ZNF626	hg19_genes_introns	Heterochromatin	ZNF genes & repeats	ZNF genes & repeats	rs73010234		rs73010234	+	G	G	A/G	by-cluster,by-frequency,by-1000genomes	0.195526	0.243993	chr19:20829809	-	31.0985	11.6164
chr15:40583693	ILMN_1724066	15	40580097	40600174	PLCB2	0.274209	0.0590423	5.80399e-06	0.02151	0.27101	5.9e-05	0.218202	214	0.277696	0.219091	ILMN_1724066	5330	PLCB2	phospholipase C, beta 2 (PLCB2), mRNA.	PLCB2	chr15:40583693	hg19_cpg_shores	10	PLCB2	hg19_genes_promoters	Enhancers	Repressed PolyComb	Repressed PolyComb	none	rs1173101692(2bp)	none		NA	NA	No SNP				chr15:40583693	-	30.528	10.9483
chr11:67909515	ILMN_1691151	11	67820325	67888858	CHKA	0.142156	0.0319417	1.34806e-05	0.038775	0.27088	7.6e-05	0.255132	208	0.527483	0.21627	ILMN_1691151	1119	CHKA	choline kinase alpha (CHKA), transcript variant 2, mRNA.	CHKA	chr11:67909515	hg19_cpg_inter	1		hg19_genes_intergenic	Enhancers	Quiescent/Low	Weak Repressed PolyComb	rs1454743663		rs1454743663	+	C	C	C/G	unknown	0	0	chr11:67909515	+	31.726	11.3566
chr5:134364360	ILMN_1674386	5	134363423	134369964	PITX1	0.208503	0.0452398	6.78495e-06	0.0243268	0.27045	3.2e-05	0.151466	230	0.16983	0.12126	ILMN_1674386	5307	PITX1	paired-like homeodomain transcription factor 1 (PITX1), mRNA.	PITX1	chr5:134364360	hg19_cpg_islands	3	PITX1	hg19_genes_exons	Repressed PolyComb	Repressed PolyComb	Repressed PolyComb	none	rs1481629812(1bp)	none		NA	NA	No SNP				chr5:134364360	+	60.1	22.438
chr4:90600862	ILMN_1701933	4	90645249	90758127	SNCA	-0.933968	0.20059	5.50813e-06	0.0206932	-0.26967	3.4e-05	0.155755	230	0.826748	0.163929	ILMN_1701933	6622	SNCA	synuclein, alpha (non A4 component of amyloid precursor) (SNCA), transcript variant NACP112, mRNA.	SNCA	chr4:90600862	hg19_cpg_inter	1		hg19_genes_intergenic	Quiescent/Low	Quiescent/Low	Quiescent/Low	rs954028487		rs954028487	+	G	G	A/G	unknown	0	0	chr4:90600862	-	53.2261	21.7008
chr4:90600862	ILMN_1766165	4	90645249	90758350	SNCA	-0.711461	0.156795	9.2646e-06	0.0298439	-0.26938	3.5e-05	0.157736	230	0.826748	0.163929	ILMN_1766165	6622	SNCA	synuclein, alpha (non A4 component of amyloid precursor) (SNCA), transcript variant NACP140, mRNA.	SNCA	chr4:90600862	hg19_cpg_inter	1		hg19_genes_intergenic	Quiescent/Low	Quiescent/Low	Quiescent/Low	rs954028487		rs954028487	+	G	G	A/G	unknown	0	0	chr4:90600862	-	53.2261	21.7008
chr19:6744979	ILMN_1655414	19	6663147	6670599	TNFSF14	0.109139	0.0249421	1.85288e-05	0.0487481	0.26924	5.2e-05	0.205193	220	0.338033	0.220221	ILMN_1655414	8740	TNFSF14	tumor necrosis factor (ligand) superfamily, member 14 (TNFSF14), transcript variant 1, mRNA.	TNFSF14	chr19:6744979	hg19_cpg_shores	8	TRIP10	hg19_genes_exons	Transcr. at gene 5' and 3'	Flanking Active TSS	Enhancers	rs767941294		rs767941294	+	C	C	A/C/T	by-frequency	6.9e-05	0.005866	chr19:6744979	+	33.7	12.8483
chr18:21178208	ILMN_2075643	18	21179977	21242849	ANKRD29	0.228216	0.0459018	1.3147e-06	0.00703899	0.26769	4.9e-05	0.198275	224	0.808071	0.240623	ILMN_2075643	147463	ANKRD29	ankyrin repeat domain 29 (ANKRD29), mRNA.	ANKRD29	chr18:21178208	hg19_cpg_inter	1		hg19_genes_intergenic	Quiescent/Low	Quiescent/Low	Weak transcription	rs60081953		rs60081953	+	G	G	A/G	by-cluster,by-frequency,by-1000genomes	0.053593	0.154675	chr18:21178208	-	38.6339	13.8256
chr19:55837634	ILMN_2185845	19	55795533	55823903	BRSK1	-0.373244	0.0810532	6.90232e-06	0.0245761	-0.2653	4.6e-05	0.18911	230	0.513256	0.123152	ILMN_2185845	84446	BRSK1	BR serine/threonine kinase 1 (BRSK1), mRNA.	BRSK1	chr19:55837634	hg19_cpg_inter	5	TMEM150B	hg19_genes_promoters	Enhancers	Weak transcription	Weak Repressed PolyComb	rs941977281		rs941977281	+	C	C	C/T	unknown	0	0	chr19:55837634	+	91.0348	33.895
chr10:11784772	ILMN_2072178	10	11784355	11806065	ECHDC3	-0.844325	0.153729	1.06863e-07	0.000998504	-0.26296	0.000124	0.340546	208	0.113358	0.151303	ILMN_2072178	79746	ECHDC3	enoyl Coenzyme A hydratase domain containing 3 (ECHDC3), mRNA.	ECHDC3	chr10:11784772	hg19_cpg_islands	2	ECHDC3	hg19_genes_introns	Active TSS	Active TSS	Bivalent/Poised TSS	none	rs1184747148(1bp)	none		NA	NA	No SNP				chr10:11784772	+	31.8029	11.919
chr17:79846216	ILMN_1652846	17	79860776	79869353	PCYT2	-0.184928	0.037201	1.31948e-06	0.00703899	-0.25932	7.2e-05	0.245807	229	0.809415	0.288911	ILMN_1652846	5833	PCYT2	phosphate cytidylyltransferase 2, ethanolamine (PCYT2), mRNA.	PCYT2	chr17:79846216	hg19_cpg_islands	11	ALYREF	hg19_genes_exons	Strong transcription	Strong transcription	Strong transcription	rs75583866		rs75583866	+	G	G	A/G	by-cluster,by-frequency,by-1000genomes	0.102726	0.202016	chr17:79846216	-	43.2795	14.8197
chr19:35739550	ILMN_1729188	19	35773409	35776045	HAMP	4.87426	0.354541	1.25954e-31	6.4729e-26	0.25873	0.00018	0.401108	205	0.00200962	0.0163532	ILMN_1729188	57817	HAMP	hepcidin antimicrobial peptide (HAMP), mRNA.	HAMP	chr19:35739550	hg19_cpg_islands	6	LSR	hg19_genes_promoters	Flanking Bivalent TSS/Enh	Repressed PolyComb	Bivalent Enhancer	none	rs1269054353(1bp)	none		NA	NA	No SNP				chr19:35739550	-	29.5268	9.98605
chr11:67171667	ILMN_1710434	11	67171383	67177561	TBC1D10C	-0.264221	0.0600673	1.68052e-05	0.0453268	-0.2578	0.000197	0.421606	204	0.661326	0.226089	ILMN_1710434	374403	TBC1D10C	TBC1 domain family, member 10C (TBC1D10C), mRNA.	TBC1D10C	chr11:67171667	hg19_cpg_shelves	10	TBC1D10C	hg19_genes_5UTRs	Active TSS	Weak Repressed PolyComb	Weak Repressed PolyComb	rs749815835		rs749815835	+	G	G	A/G	by-frequency	0.000101	0.007096	chr11:67171667	-	32.049	12.0572
chr1:161008395	ILMN_3197097	1	161007421	161008774	TSTD1	-0.382652	0.084373	9.35614e-06	0.0300512	-0.25762	8.3e-05	0.269221	228	0.608311	0.192373	ILMN_3197097	100131187	TSTD1	thiosulfate sulfurtransferase (rhodanese)-like domain containing 1 (TSTD1), transcript variant 2, mRNA.	TSTD1	chr1:161008395	hg19_cpg_islands	7	TSTD1	hg19_genes_exons	Transcr. at gene 5' and 3'	Weak transcription	Active TSS	rs772078333		rs772078333	+	G	G	A/G	unknown	0.000116	0.0076	chr1:161008395	-	41.2719	15.5797
chr1:203236966	ILMN_3249477	1	203185206	203198860	CHIT1	1.65836	0.34657	3.09436e-06	0.0136304	0.2576	0.000185	0.405463	206	0.0138601	0.0661101	ILMN_3249477	1118	CHIT1	chitinase 1 (chitotriosidase) (CHIT1), mRNA.	CHIT1	chr1:203236966	hg19_cpg_inter	1	CHIT1	hg19_genes_introns	Flanking Active TSS	Active TSS	Active TSS	rs955577534		rs955577534	+	C	C	C/T	unknown	0	0	chr1:203236966	+	31.3932	12.2747
chr22:37608539	ILMN_3238196	22	37678494	37711389	CYTH4	0.512142	0.116445	1.68482e-05	0.0453268	0.25756	7.8e-05	0.259595	230	0.191719	0.138554	ILMN_3238196	27128	CYTH4	cytohesin 4 (CYTH4), mRNA.	CYTH4	chr22:37608539	hg19_cpg_inter	3	SSTR3	hg19_genes_promoters	Weak Repressed PolyComb	Bivalent Enhancer	Repressed PolyComb	rs1339835088		rs1339835088	+	C	C	C/T	unknown	0	0	chr22:37608539	+	56.987	16.7009
chr19:19648297	ILMN_1805693	19	19740281	19754476	GMIP	0.153867	0.0338176	8.77812e-06	0.0289176	0.25722	0.000219	0.443491	202	0.323563	0.210088	ILMN_1805693	51291	GMIP	GEM interacting protein (GMIP), mRNA.	GMIP	chr19:19648297	hg19_cpg_islands	8	CILP2	hg19_genes_promoters	Flanking Active TSS	Weak Repressed PolyComb	Weak Repressed PolyComb	rs775335554		rs775335554	+	G	G	A/G	unknown	3.4e-05	0.004104	chr19:19648297	-	28.6386	9.79253
chr7:139445578	ILMN_2282641	7	139528951	139720125	TBXAS1	0.404597	0.0915295	1.53278e-05	0.0422378	0.25654	0.000103	0.306272	224	0.159097	0.151968	ILMN_2282641	6916	TBXAS1	thromboxane A synthase 1 (platelet, cytochrome P450, family 5, subfamily A) (TBXAS1), transcript variant TXS-I, mRNA.	TBXAS1	chr7:139445578	hg19_cpg_inter	2	HIPK2	hg19_genes_introns	Enhancers	Enhancers	Enhancers	rs542271500		rs542271500	+	G	G	A/G	by-frequency,by-1000genomes	0.002792	0.037256	chr7:139445578	-	48.8304	18.2584
chr2:60666994	ILMN_2255133	2	60684328	60780633	BCL11A	-0.132885	0.0268905	1.51181e-06	0.00779531	-0.25321	0.000439	0.593137	189	0.589248	0.225739	ILMN_2255133	53335	BCL11A	B-cell CLL/lymphoma 11A (zinc finger protein) (BCL11A), transcript variant 1, mRNA.	BCL11A	chr2:60666994	hg19_cpg_inter	1		hg19_genes_intergenic	Weak Repressed PolyComb	Weak Repressed PolyComb	Quiescent/Low	rs1023500554		rs1023500554	+	G	G	A/G	unknown	0	0	chr2:60666994	-	30.9312	11.6286
chr15:40693494	ILMN_1724066	15	40580097	40600174	PLCB2	-0.590034	0.12762	6.3653e-06	0.0229996	-0.25178	0.000244	0.469502	208	0.929488	0.101234	ILMN_1724066	5330	PLCB2	phospholipase C, beta 2 (PLCB2), mRNA.	PLCB2	chr15:40693494	hg19_cpg_inter	2	IVD	hg19_genes_1to5kb	Weak transcription	Quiescent/Low	Weak transcription	rs1361568601		rs1361568601	+	G	G	A/G	unknown	0	0	chr15:40693494	-	34.0337	13.4248
chr17:80262617	ILMN_2364022	17	80186886	80197375	SLC16A3	0.872647	0.167045	3.98551e-07	0.00283159	0.25096	0.00012	0.332293	230	0.31818	0.101765	ILMN_2364022	9123	SLC16A3	solute carrier family 16, member 3 (monocarboxylic acid transporter 4) (SLC16A3), transcript variant 2, mRNA.	SLC16A3	chr17:80262617	hg19_cpg_inter	1		hg19_genes_intergenic	Weak Repressed PolyComb	Weak Repressed PolyComb	Weak Repressed PolyComb	rs1326767649		rs1326767649	+	G	G	A/G	unknown	0	0	chr17:80262617	-	166.004	45.3762
chr15:40583678	ILMN_1724066	15	40580097	40600174	PLCB2	0.258884	0.0582081	1.36512e-05	0.0390132	0.25095	0.000208	0.434706	214	0.287152	0.221901	ILMN_1724066	5330	PLCB2	phospholipase C, beta 2 (PLCB2), mRNA.	PLCB2	chr15:40583678	hg19_cpg_shores	10	PLCB2	hg19_genes_promoters	Enhancers	Repressed PolyComb	Repressed PolyComb	rs536983027		rs536983027	+	G	G	A/G	by-frequency,by-1000genomes	0.000154	0.008771	chr15:40583678	-	30.5234	10.974
chr11:47399543	ILMN_1696463	11	47376408	47400127	SPI1	-0.400893	0.0916585	1.86782e-05	0.048974	-0.2417	0.000287	0.503544	221	0.588111	0.210803	ILMN_1696463	6688	SPI1	spleen focus forming virus (SFFV) proviral integration oncogene spi1 (SPI1), transcript variant 1, mRNA.	SPI1	chr11:47399543	hg19_cpg_shores	4	SLC39A13	hg19_genes_introns	Active TSS	Quiescent/Low	Weak Repressed PolyComb	rs910237301		rs910237301	+	G	G	A/G	unknown	0	0	chr11:47399543	-	45.5656	17.5331
chr19:18211733	ILMN_1807277	19	18284589	18288934	IFI30	0.588794	0.129522	8.93221e-06	0.0292378	0.23091	0.000427	0.585816	229	0.304026	0.17647	ILMN_1807277	10437	IFI30	interferon, gamma-inducible protein 30 (IFI30), mRNA.	IFI30	chr19:18211733	hg19_cpg_shores	2	MAST3	hg19_genes_introns	Bivalent Enhancer	Weak Repressed PolyComb	Repressed PolyComb	none	rs1289194769(1bp)	none		NA	NA	No SNP				chr19:18211733	+	47.9258	17.1944
chr16:28518260	ILMN_1697925	16	28505969	28510291	APOB48R	-0.176373	0.0388045	8.96138e-06	0.0292711	-0.23039	0.000427	0.585816	230	0.755338	0.117702	ILMN_1697925	55911	APOB48R	apolipoprotein B48 receptor (APOB48R), mRNA.	APOBR	chr16:28518260	hg19_cpg_inter	2	IL27	hg19_genes_promoters	Active TSS	Weak Repressed PolyComb	Repressed PolyComb	rs1451883782		rs1451883782	+	G	G	A/G	unknown	0	0	chr16:28518260	-	154.357	44.7657
chr10:11725105	ILMN_2072178	10	11784355	11806065	ECHDC3	-0.487663	0.111096	1.7471e-05	0.0465207	-0.22993	0.000967	0.793622	203	0.379765	0.218402	ILMN_2072178	79746	ECHDC3	enoyl Coenzyme A hydratase domain containing 3 (ECHDC3), mRNA.	ECHDC3	chr10:11725105	hg19_cpg_inter	1		hg19_genes_intergenic	Weak transcription	Weak Repressed PolyComb	Repressed PolyComb	rs116627522		rs116627522	+	G	G	A/G/T	by-frequency,by-1000genomes	0.010725	0.072438	chr10:11725105	-	29.9458	12.5292
chr6:168443004	ILMN_1665903	6	168418552	168445769	KIF25	-0.705897	0.155982	9.75964e-06	0.0310241	-0.22794	0.000697	0.710459	218	0.800309	0.184113	ILMN_1665903	3834	KIF25	kinesin family member 25 (KIF25), transcript variant 1, mRNA.		chr6:168443004	hg19_cpg_inter	2	KIF25	hg19_genes_introns	Active TSS	Quiescent/Low	Weak Repressed PolyComb	rs140465870		rs140465870	+	G	G	A/G	by-cluster,by-frequency,by-1000genomes	0.000798	0.019964	chr6:168443004	-	39.9679	14.5935
chr17:48046563	ILMN_1685397	17	48133339	48167849	ITGA3	0.79847	0.162185	1.64679e-06	0.0083792	0.22278	0.000743	0.725821	226	0.0254982	0.0583781	ILMN_1685397	3675	ITGA3	integrin, alpha 3 (antigen CD49C, alpha 3 subunit of VLA-3 receptor) (ITGA3), transcript variant a, mRNA.	ITGA3	chr17:48046563	hg19_cpg_islands	3	DLX4	hg19_genes_5UTRs	Flanking Active TSS	Weak Repressed PolyComb	Repressed PolyComb	rs906932105		rs906932105	+	C	C	C/G	unknown	0	0	chr17:48046563	+	40.6062	13.9146
chr15:89952842	ILMN_1655642	15	89787193	89860362	FANCI	0.207491	0.0469357	1.53043e-05	0.0422378	0.2216	0.003119	1	176	0.0391751	0.0905488	ILMN_1655642	55215	FANCI	Fanconi anemia, complementation group I (FANCI), transcript variant 2, mRNA.	FANCI	chr15:89952842	hg19_cpg_islands	1		hg19_genes_intergenic	Bivalent Enhancer	Repressed PolyComb	Bivalent/Poised TSS	rs372862318		rs372862318	+	G	G	A/C/G	by-cluster,by-frequency,by-1000genomes	0.002393	0.03451	chr15:89952842	-	26.2386	10.0581
chr11:67219882	ILMN_1710434	11	67171383	67177561	TBC1D10C	0.24946	0.0571099	1.91337e-05	0.0495385	0.22019	0.001827	0.976329	198	0.402326	0.24027	ILMN_1710434	374403	TBC1D10C	TBC1 domain family, member 10C (TBC1D10C), mRNA.	TBC1D10C	chr11:67219882	hg19_cpg_inter	3	CABP4	hg19_genes_promoters	Enhancers	Quiescent/Low	Weak Repressed PolyComb	rs201384962		rs201384962	+	C	C	C/T	by-cluster,by-1000genomes	1.8e-05	0.002999	chr11:67219882	+	28.0051	11.0263
chr11:9112921	ILMN_1759563	11	9002122	9025596	NRIP3	2.22892	0.464886	2.96432e-06	0.0131705	0.21941	0.002621	1	186	0.00542418	0.0281723	ILMN_1759563	56675	NRIP3	nuclear receptor interacting protein 3 (NRIP3), mRNA.	NRIP3	chr11:9112921	hg19_cpg_islands	4	MIR5691	hg19_genes_promoters	Active TSS	Active TSS	Active TSS	rs779295758		rs779295758	+	G	G	A/G	unknown	9.5e-05	0.006896	chr11:9112921	-	26.5376	10.2283
chr11:1051306	ILMN_1803779	11	925808	1012245	AP2A2	0.1937	0.0418377	6.18703e-06	0.0225482	0.21494	0.001731	0.962838	210	0.0790844	0.154132	ILMN_1803779	161	AP2A2	adaptor-related protein complex 2, alpha 2 subunit (AP2A2), mRNA.	AP2A2	chr11:1051306	hg19_cpg_inter	1		hg19_genes_intergenic	Weak Repressed PolyComb	Weak Repressed PolyComb	Repressed PolyComb	none	rs538433052(1bp)	none		NA	NA	No SNP				chr11:1051306	-	29.9286	11.051
chr6:168443004	ILMN_1676679	6	168418552	168445769	KIF25	-0.684695	0.153379	1.27185e-05	0.037137	-0.21453	0.00144	0.911907	218	0.800309	0.184113	ILMN_1676679	3834	KIF25	kinesin family member 25 (KIF25), transcript variant 2, mRNA.	KIF25	chr6:168443004	hg19_cpg_inter	2	KIF25	hg19_genes_introns	Active TSS	Quiescent/Low	Weak Repressed PolyComb	rs140465870		rs140465870	+	G	G	A/G	by-cluster,by-frequency,by-1000genomes	0.000798	0.019964	chr6:168443004	-	39.9679	14.5935
chr19:15564213	ILMN_1795089	19	15562437	15575382	RASAL3	0.262208	0.0569298	6.87562e-06	0.0245377	0.21044	0.002172	1	210	0.353206	0.229411	ILMN_1795089	64926	RASAL3	RAS protein activator like 3 (RASAL3), mRNA.	RASAL3	chr19:15564213	hg19_cpg_islands	5	RASAL3	hg19_genes_exons	Flanking Active TSS	Weak Repressed PolyComb	Active TSS	rs770084092		rs770084092	+	C	C	C/T	unknown	9e-05	0.006718	chr19:15564213	+	31.2714	11.7814
chr19:3585581	ILMN_1813374	19	3544196	3557582	C19orf28	3.05846	0.545608	6.04456e-08	0.000647156	0.20792	0.002776	1	205	0.0025763	0.0143711	ILMN_1813374	126321	C19orf28	chromosome 19 open reading frame 28 (C19orf28), transcript variant 3, mRNA.	C19orf28	chr19:3585581	hg19_cpg_islands	2	GIPC3	hg19_genes_5UTRs	Flanking Active TSS	Bivalent/Poised TSS	Weak Repressed PolyComb	rs1214727223		rs1214727223	+	C	C	C/G/T	unknown	0	0	chr19:3585581	+	28.8634	10.4783
chr4:1796219	ILMN_1724407	4	1723216	1746905	TACC3	0.473568	0.103327	7.59152e-06	0.0260188	0.20558	0.002571	1	213	0.0277052	0.0618105	ILMN_1724407	10460	TACC3	transforming, acidic coiled-coil containing protein 3 (TACC3), mRNA.	TACC3	chr4:1796219	hg19_cpg_islands	5	FGFR3	hg19_genes_introns	Bivalent Enhancer	Weak Repressed PolyComb	Repressed PolyComb	none	rs1192755816(4bp)	none		NA	NA	No SNP				chr4:1796219	-	33.3145	12.3689
chr1:21864351	ILMN_1701603	1	21835857	21904905	ALPL	0.678232	0.150525	1.06289e-05	0.033124	0.20382	0.002495	1	218	0.194675	0.171537	ILMN_1701603	249	ALPL	alkaline phosphatase, liver/bone/kidney (ALPL), transcript variant 1, mRNA.	ALPL	chr1:21864351	hg19_cpg_inter	4	ALPL	hg19_genes_introns	Enhancers	Enhancers	Enhancers	none	rs1348316100(1bp)	none		NA	NA	No SNP				chr1:21864351	+	37.4174	15.3939

## Sheet: table-S2B
Supplementary Table-2B: cis-eQTM regions for glucometabolic trait-associated transcripts in adipose tissue.
cis-eQTM analysis is based on CpG regions (tilling window of 1000bp region) within and ±100kb of the transcript.
cis-eQTM regions significant in linear regression analysis (FDR-P<0.05) and partial correlation r (Spearman’s ) ≥ +0.2 or ≤ -0.2 are shown.
Results are sorted by absolute value of partial correlation coefficient.
eQTM						Linear regression				Partial correlation			Methylation Level			Probe annotation					ANNOTATR CpG region_annotation
CpG Region	transcript Probe ID	Chr	Start	End	Symbol	Beta	SE	P_value	FDR_P	Corr_Coeff	P_value	FDR_P	N	Mean	StDev	Probe_Id	Entrez_Gene_ID	adipose-illuminaHT12V4 all probe finalannot_Symbol	Definition	Gene_symbol	CountOf_CpGannot	annottype_CpG	CountOf_gene annot	annotsymbol_gene	annottype_gene
chr2:25384001-25385000	ILMN_2403664	2	25383721	25391559	POMC	-0.583589	0.0471167	3.3e-27	8.18e-22	-0.63204	4.7e-27	1.17e-21	230	0.277772	0.118582	ILMN_2403664	5443	POMC	proopiomelanocortin (POMC), transcript variant 1, mRNA.	POMC	2	hg19_cpg_islands	9	POMC	hg19_genes_exons
chr2:25384001-25385000	ILMN_1672899	2	25383721	25391559	POMC	-0.825632	0.0677682	1.48e-26	1.84e-21	-0.6247	2.7e-26	3.35e-21	230	0.277772	0.118582	ILMN_1672899	5443	POMC	proopiomelanocortin (POMC), transcript variant 1, mRNA.	POMC	2	hg19_cpg_islands	9	POMC	hg19_genes_exons
chr8:600001-601000	ILMN_2104696	8	614199	681226	ERICH1	-0.41798	0.0451973	1.82e-17	1.41e-12	-0.52144	1.95e-17	1.61e-12	230	0.822368	0.161773	ILMN_2104696	157697	ERICH1	glutamate-rich 1 (ERICH1), mRNA.	ERICH1	4	hg19_cpg_islands	1		hg19_genes_intergenic
chr8:600001-601000	ILMN_1731001	8	614199	681226	ERICH1	-0.342742	0.0371935	2.27e-17	1.41e-12	-0.48668	4.43e-15	2.75e-10	230	0.822368	0.161773	ILMN_1731001	157697	ERICH1	glutamate-rich 1 (ERICH1), mRNA.	ERICH1	4	hg19_cpg_islands	1		hg19_genes_intergenic
chr8:599001-600000	ILMN_2104696	8	614199	681226	ERICH1	-0.274805	0.04129	2.13e-10	8.8e-06	-0.41863	3.34e-09	0.00011863	184	0.801598	0.21595	ILMN_2104696	157697	ERICH1	glutamate-rich 1 (ERICH1), mRNA.	ERICH1	2	hg19_cpg_islands	2		hg19_genes_1to5kb
chr1:28573001-28574000	ILMN_1685978	1	28562601	28564616	ATPIF1	-0.262968	0.0451916	2.02e-08	0.000418484	-0.3916	7.55e-10	3.751e-05	230	0.164385	0.111413	ILMN_1685978	93974	ATPIF1	ATPase inhibitory factor 1 (ATPIF1), nuclear gene encoding mitochondrial protein, transcript variant 3, mRNA.	ATPIF1	2	hg19_cpg_islands	1		hg19_genes_intergenic
chr7:45068001-45069000	ILMN_1692295	7	45002259	45018704	MYO1G	-0.500291	0.0795778	1.66e-09	4.59051e-05	-0.38567	1.42e-09	5.885e-05	230	0.692154	0.119258	ILMN_1692295	64005	MYO1G	myosin IG (MYO1G), mRNA.	MYO1G	1	hg19_cpg_inter	7	CCM2	hg19_genes_introns
chr19:53119001-53120000	ILMN_2190414	19	53115617	53141644	ZNF83	-0.356254	0.06891	5.17e-07	0.00414036	-0.37183	5.92e-08	0.00113158	200	0.781746	0.200602	ILMN_2190414	55769	ZNF83	zinc finger protein 83 (ZNF83), mRNA.	ZNF83	1	hg19_cpg_inter	35	ZNF83	hg19_genes_5UTRs
chr8:599001-600000	ILMN_1731001	8	614199	681226	ERICH1	-0.225962	0.0339438	2.11e-10	8.8e-06	-0.36894	2.56e-07	0.00276192	184	0.801598	0.21595	ILMN_1731001	157697	ERICH1	glutamate-rich 1 (ERICH1), mRNA.	ERICH1	2	hg19_cpg_islands	2		hg19_genes_1to5kb
chr11:47399001-47400000	ILMN_1696463	11	47376408	47400127	SPI1	-0.747591	0.137037	1.28e-07	0.00149376	-0.36626	1.04e-08	0.00032209	230	0.618185	0.136407	ILMN_1696463	6688	SPI1	spleen focus forming virus (SFFV) proviral integration oncogene spi1 (SPI1), transcript variant 1, mRNA.	SPI1	2	hg19_cpg_islands	13	SPI1	hg19_genes_5UTRs
chr6:168443001-168444000	ILMN_1676679	6	168418552	168445769	KIF25	-1.17484	0.185376	1.26e-09	3.90771e-05	-0.36538	1.22e-08	0.00033604	229	0.806843	0.142846	ILMN_1676679	3834	KIF25	kinesin family member 25 (KIF25), transcript variant 2, mRNA.	KIF25	1	hg19_cpg_inter	5	KIF25	hg19_genes_exons
chr6:168443001-168444000	ILMN_1665903	6	168418552	168445769	KIF25	-1.20017	0.188621	1.1e-09	3.88586e-05	-0.36216	1.67e-08	0.00041459	229	0.806843	0.142846	ILMN_1665903	3834	KIF25	kinesin family member 25 (KIF25), transcript variant 1, mRNA.		1	hg19_cpg_inter	5	KIF25	hg19_genes_exons
chr10:11784001-11785000	ILMN_2072178	10	11784355	11806065	ECHDC3	-2.3684	0.384007	3.18e-09	7.44106e-05	-0.3591	2.09e-08	0.0004719	230	0.0883045	0.056784	ILMN_2072178	79746	ECHDC3	enoyl Coenzyme A hydratase domain containing 3 (ECHDC3), mRNA.	ECHDC3	3	hg19_cpg_islands	7	ECHDC3	hg19_genes_promoters
chr22:39531001-39532000	ILMN_2412172	22	39436672	39440428	APOBEC3F	0.292516	0.0474777	3.3e-09	7.44106e-05	0.35583	6.61e-08	0.00117293	218	0.336395	0.188407	ILMN_2412172	200316	APOBEC3F	apolipoprotein B mRNA editing enzyme, catalytic polypeptide-like 3F (APOBEC3F), transcript variant 2, mRNA.	APOBEC3F	1	hg19_cpg_inter	2	CBX7	hg19_genes_introns
chr14:31909001-31910000	ILMN_1704238	14	31915242	31926680	C14orf126	-0.308487	0.0533815	2.49e-08	0.000475441	-0.35092	9.61e-08	0.00149146	219	0.793044	0.18318	ILMN_1704238	112487	C14orf126	chromosome 14 open reading frame 126 (C14orf126), mRNA.	C14orf126	1	hg19_cpg_inter	2		hg19_genes_introns
chr16:88677001-88678000	ILMN_1744604	16	88709696	88717492	CYBA	3.69476	0.68636	1.84e-07	0.00181995	0.34812	5.92e-08	0.00113158	230	0.902138	0.0295217	ILMN_1744604	1535	CYBA	cytochrome b-245, alpha polypeptide (CYBA), mRNA.	CYBA	1	hg19_cpg_inter	16	ZC3H18	hg19_genes_promoters
chr10:102714001-102715000	ILMN_2258774	10	102746026	102747272	MRPL43	0.975496	0.171201	3.78e-08	0.000669734	0.34497	8.46e-08	0.00140028	229	0.930557	0.0577646	ILMN_2258774	84545	MRPL43	mitochondrial ribosomal protein L43 (MRPL43), nuclear gene encoding mitochondrial protein, transcript variant 1, mRNA.	MRPL43	1	hg19_cpg_inter	2	SLF2	hg19_genes_introns
chr11:63974001-63975000	ILMN_1740960	11	63766029	63933585	MACROD1	0.18907	0.0365097	4.96e-07	0.0041022	0.3414	1.25e-07	0.00182276	228	0.339168	0.183864	ILMN_1740960	28992	MACROD1	MACRO domain containing 1 (MACROD1), mRNA.	MACROD1	2	hg19_cpg_islands	16	FERMT3	hg19_genes_promoters
chr16:88744001-88745000	ILMN_1744604	16	88709696	88717492	CYBA	0.965547	0.176947	1.28e-07	0.00149376	0.33501	1.95e-07	0.00243013	230	0.527442	0.103454	ILMN_1744604	1535	CYBA	cytochrome b-245, alpha polypeptide (CYBA), mRNA.	CYBA	1	hg19_cpg_shelves	4	SNAI3	hg19_genes_exons
chr5:134364001-134365000	ILMN_1674386	5	134363423	134369964	PITX1	0.428652	0.0767583	6.73e-08	0.00111375	0.33496	1.96e-07	0.00243013	230	0.250073	0.0706723	ILMN_1674386	5307	PITX1	paired-like homeodomain transcription factor 1 (PITX1), mRNA.	PITX1	1	hg19_cpg_islands	4	PITX1	hg19_genes_exons
chr11:68611001-68612000	ILMN_1744835	11	68658745	68671303	MRPL21	0.573126	0.105346	1.38e-07	0.00149376	0.33358	2.21e-07	0.00254899	230	0.235638	0.0873513	ILMN_1744835	219927	MRPL21	mitochondrial ribosomal protein L21 (MRPL21), nuclear gene encoding mitochondrial protein, transcript variant 1, mRNA.	MRPL21	3	hg19_cpg_islands	2	CPT1A	hg19_genes_1to5kb
chr16:31488001-31489000	ILMN_2254635	16	31366454	31394318	ITGAX	-0.757007	0.169056	1.1988e-05	0.0391703	-0.33335	2.26e-07	0.00254899	230	0.592219	0.12478	ILMN_2254635	3687	ITGAX	integrin, alpha X (complement component 3 receptor 4 subunit) (ITGAX), mRNA.	ITGAX	2	hg19_cpg_islands	24	TGFB1I1	hg19_genes_exons
chr19:54677001-54678000	ILMN_1784884	19	54720146	54746711	LILRB3	0.868274	0.185171	4.76e-06	0.0188951	0.32941	3.39e-07	0.00350098	229	0.529231	0.122697	ILMN_1784884	11025	LILRB3	leukocyte immunoglobulin-like receptor, subfamily B (with TM and ITIM domains), member 3 (LILRB3), transcript variant 2, mRNA.	LILRB3	1	hg19_cpg_inter	24	TMC4	hg19_genes_promoters
chr1:161349001-161350000	ILMN_2323366	1	161284165	161334535	SDHC	0.164265	0.0301869	1.38e-07	0.00149376	0.32826	3.53e-07	0.00350098	230	0.596138	0.22324	ILMN_2323366	6391	SDHC	succinate dehydrogenase complex, subunit C, integral membrane protein, 15kDa (SDHC), nuclear gene encoding mitochondrial protein, transcript variant 4, mRNA.	SDHC	1	hg19_cpg_inter	1		hg19_genes_intergenic
chr3:44349001-44350000	ILMN_1754423	3	44379943	44450940	C3orf23	0.256383	0.0543574	4.21e-06	0.0180583	0.32754	9.11e-06	0.0327705	176	0.893375	0.114147	ILMN_1754423	285343	C3orf23	chromosome 3 open reading frame 23 (C3orf23), transcript variant 1, mRNA.	C3orf23	1	hg19_cpg_inter	1	TOPAZ1	hg19_genes_introns
chr9:107547001-107548000	ILMN_1786308	9	107526450	107536291	NIPSNAP3B	-0.394504	0.0713788	8.99e-08	0.00131286	-0.32461	5.42e-07	0.00511967	228	0.570243	0.162054	ILMN_1786308	55335	NIPSNAP3B	nipsnap homolog 3B (C. elegans) (NIPSNAP3B), mRNA.	NIPSNAP3B	1	hg19_cpg_inter	5	ABCA1	hg19_genes_exons
chr11:63974001-63975000	ILMN_2366330	11	63974151	63991363	FERMT3	-0.395608	0.0885374	1.24926e-05	0.0392691	-0.32429	5.57e-07	0.00511967	228	0.339168	0.183864	ILMN_2366330	83706	FERMT3	fermitin family homolog 3 (Drosophila) (FERMT3), transcript variant URP2SF, mRNA.	FERMT3	2	hg19_cpg_islands	16	FERMT3	hg19_genes_promoters
chr17:46697001-46698000	ILMN_1798496	17	46689707	46692301	HOXB8	1.06163	0.196156	1.59e-07	0.00164641	0.32199	6.04e-07	0.00524478	230	0.524882	0.0760619	ILMN_1798496	3218	HOXB8	homeobox B8 (HOXB8), mRNA.	HOXB8	3	hg19_cpg_islands	2	HOXB8	hg19_genes_1to5kb
chr1:161008001-161009000	ILMN_3197097	1	161007421	161008774	TSTD1	-0.748328	0.136169	1.05e-07	0.00137395	-0.32181	6.13e-07	0.00524478	230	0.460156	0.117249	ILMN_3197097	100131187	TSTD1	thiosulfate sulfurtransferase (rhodanese)-like domain containing 1 (TSTD1), transcript variant 2, mRNA.	TSTD1	3	hg19_cpg_islands	34	F11R	hg19_genes_promoters
chr7:1163001-1164000	ILMN_1684227	7	1097140	1098897	GPR146	-0.324566	0.0651882	1.27e-06	0.00770518	-0.3171	9.1e-07	0.00705968	230	0.31807	0.14685	ILMN_1684227	115330	GPR146	G protein-coupled receptor 146 (GPR146), mRNA.	GPR146	1	hg19_cpg_inter	3	C7orf50	hg19_genes_introns
chr2:160638001-160639000	ILMN_1716797	2	160625138	160654766	CD302	0.494454	0.0988108	1.13e-06	0.0074234	0.3156	2.47e-06	0.0139857	214	0.792294	0.127832	ILMN_1716797	9936	CD302	CD302 molecule (CD302), mRNA.	CD302,LY75-CD302	1	hg19_cpg_inter	5	CD302	hg19_genes_introns
chr19:8511001-8512000	ILMN_1681239	19	8585673	8642331	MYO1F	0.175169	0.037461	5.04e-06	0.0195637	0.3154	1.71e-06	0.0116426	221	0.359009	0.192088	ILMN_1681239	4542	MYO1F	myosin IF (MYO1F), mRNA.	MYO1F	1	hg19_cpg_shores	4	HNRNPM	hg19_genes_introns
chr2:207104001-207105000	ILMN_1694587	2	207024317	207027653	EEF1B2	0.296172	0.063088	4.64e-06	0.0188951	0.31459	1.4e-05	0.042164	183	0.523675	0.238371	ILMN_1694587	1933	EEF1B2	eukaryotic translation elongation factor 1 beta 2 (EEF1B2), transcript variant 1, mRNA.	EEF1B2	1	hg19_cpg_inter	2		hg19_genes_intronexonboundaries
chr17:72528001-72529000	ILMN_1693552	17	72462521	72480937	CD300A	-0.338539	0.0771082	1.74069e-05	0.0457554	-0.31273	1.53e-06	0.011201	227	0.671528	0.163822	ILMN_1693552	11314	CD300A	CD300a molecule (CD300A), mRNA.	CD300A	1	hg19_cpg_inter	4	CD300LB	hg19_genes_promoters
chr18:74818001-74819000	ILMN_1672660	18	74724738	74844774	MBP	-0.466204	0.0926105	9.83e-07	0.0070954	-0.3112	1.74e-06	0.0116426	227	0.506443	0.16444	ILMN_1672660	4155	MBP	myelin basic protein (MBP), transcript variant 8, mRNA.	MBP	1	hg19_cpg_inter	2	MBP	hg19_genes_introns
chr9:135878001-135879000	ILMN_1699856	9	135973106	135996637	RALGDS	0.58093	0.132505	1.78727e-05	0.0457554	0.31048	1.94e-06	0.0125446	226	0.297135	0.111627	ILMN_1699856	5900	RALGDS	ral guanine nucleotide dissociation stimulator (RALGDS), transcript variant 1, mRNA.	RALGDS	1	hg19_cpg_inter	1		hg19_genes_intergenic
chr11:63974001-63975000	ILMN_2366334	11	63974151	63991363	FERMT3	-0.235119	0.0536053	1.77282e-05	0.0457554	-0.30876	2e-06	0.0125446	228	0.339168	0.183864	ILMN_2366334	83706	FERMT3	fermitin family homolog 3 (Drosophila) (FERMT3), transcript variant URP2SF, mRNA.	FERMT3	2	hg19_cpg_islands	16	FERMT3	hg19_genes_promoters
chr16:31363001-31364000	ILMN_1685009	16	31271287	31344213	ITGAM	-0.483138	0.105385	7.55e-06	0.0260344	-0.30806	3.75e-06	0.0190032	217	0.725187	0.154504	ILMN_1685009	3684	ITGAM	integrin, alpha M (complement component 3 receptor 3 subunit) (ITGAM), transcript variant 2, mRNA.	ITGAM	1	hg19_cpg_inter	3	ITGAX	hg19_genes_1to5kb
chr17:80262001-80263000	ILMN_2364022	17	80186886	80197375	SLC16A3	0.984527	0.176741	7.22e-08	0.00112059	0.306	2.25e-06	0.013642	230	0.321869	0.0963819	ILMN_2364022	9123	SLC16A3	solute carrier family 16, member 3 (monocarboxylic acid transporter 4) (SLC16A3), transcript variant 2, mRNA.	SLC16A3	1	hg19_cpg_inter	1		hg19_genes_intergenic
chr11:118081001-118082000	ILMN_1778723	11	118064441	118084074	AMICA1	0.456377	0.104346	1.86845e-05	0.0463742	0.30544	2.48e-06	0.0139857	229	0.337436	0.174274	ILMN_1778723	120425	AMICA1	adhesion molecule, interacts with CXADR antigen 1 (AMICA1), mRNA.	AMICA1	1	hg19_cpg_inter	28	JAML	hg19_genes_exons
chr2:239025001-239026000	ILMN_2115862	2	239008950	239041928	ESPNL	-0.366334	0.0733812	1.2e-06	0.0074234	-0.30541	4.2e-05	0.0834625	174	0.878197	0.119735	ILMN_2115862	339768	ESPNL	espin-like (ESPNL), mRNA.	ESPNL	1	hg19_cpg_inter	5	ESPNL	hg19_genes_exons
chr17:46696001-46697000	ILMN_1798496	17	46689707	46692301	HOXB8	1.02257	0.203679	1.05e-06	0.00722685	0.30529	2.38e-06	0.0139857	230	0.216339	0.0748868	ILMN_1798496	3218	HOXB8	homeobox B8 (HOXB8), mRNA.	HOXB8	3	hg19_cpg_islands	1	HOXB8	hg19_genes_1to5kb
chr7:45002001-45003000	ILMN_1692295	7	45002259	45018704	MYO1G	0.339023	0.0678716	1.18e-06	0.0074234	0.30259	2.95e-06	0.0162974	230	0.258825	0.142744	ILMN_1692295	64005	MYO1G	myosin IG (MYO1G), mRNA.	MYO1G	3	hg19_cpg_islands	22	MYO1G	hg19_genes_exons
chr19:6744001-6745000	ILMN_1655414	19	6663147	6670599	TNFSF14	0.122773	0.0257028	3.21e-06	0.0147806	0.30143	5.32e-06	0.0236758	220	0.332433	0.212391	ILMN_1655414	8740	TNFSF14	tumor necrosis factor (ligand) superfamily, member 14 (TNFSF14), transcript variant 1, mRNA.	TNFSF14	2	hg19_cpg_shores	24	TRIP10	hg19_genes_exons
chr19:39086001-39087000	ILMN_1665943	19	39078279	39108675	MAP4K1	0.46296	0.0841409	1.02e-07	0.00137395	0.29964	3.72e-06	0.0190032	230	0.214556	0.108428	ILMN_1665943	11184	MAP4K1	mitogen-activated protein kinase kinase kinase kinase 1 (MAP4K1), transcript variant 1, mRNA.	MAP4K1	2	hg19_cpg_islands	24	MAP4K1	hg19_genes_exons
chr1:161256001-161257000	ILMN_2123743	1	161185086	161189038	FCER1G	-1.29096	0.264415	1.99e-06	0.0112159	-0.29957	7.45e-06	0.0288959	216	0.712897	0.10752	ILMN_2123743	2207	FCER1G	Fc fragment of IgE, high affinity I, receptor for; gamma polypeptide (FCER1G), mRNA.	FCER1G	1	hg19_cpg_inter	1		hg19_genes_intergenic
chr17:34866001-34867000	ILMN_3244114	17	34948225	34957233	DHRS11	-0.394865	0.0862498	7.76e-06	0.026402	-0.29953	5.9e-05	0.095792	174	0.749976	0.191347	ILMN_3244114	79154	DHRS11	dehydrogenase/reductase (SDR family) member 11 (DHRS11), mRNA.	DHRS11	1	hg19_cpg_inter	16	MYO19	hg19_genes_exons
chr11:47399001-47400000	ILMN_2392043	11	47376408	47400127	SPI1	-0.61769	0.140231	1.63788e-05	0.0444967	-0.29845	4.09e-06	0.0202973	230	0.618185	0.136407	ILMN_2392043	6688	SPI1	spleen focus forming virus (SFFV) proviral integration oncogene spi1 (SPI1), transcript variant 2, mRNA.	SPI1	2	hg19_cpg_islands	13	SPI1	hg19_genes_5UTRs
chr1:153486001-153487000	ILMN_1688780	1	153516094	153518282	S100A4	-0.932186	0.210102	1.42919e-05	0.0412681	-0.29359	5.94e-06	0.0258781	230	0.728233	0.103598	ILMN_1688780	6275	S100A4	S100 calcium binding protein A4 (S100A4), transcript variant 2, mRNA.	S100A4	1	hg19_cpg_inter	1		hg19_genes_intergenic
chr9:107547001-107548000	ILMN_3236656	9	107536632	107540045	LOC286367	-0.560091	0.11648	2.78e-06	0.0141031	-0.29343	6.61e-06	0.0273488	228	0.570243	0.162054	ILMN_3236656	286367	LOC286367	FP944 (LOC286367), non-coding RNA.	LOC286367	1	hg19_cpg_inter	5	ABCA1	hg19_genes_exons
chr1:27941001-27942000	ILMN_2368318	1	27938800	27953106	FGR	1.02827	0.213737	2.75e-06	0.0141031	0.29277	6.32e-06	0.0266174	230	0.435031	0.120507	ILMN_2368318	2268	FGR	Gardner-Rasheed feline sarcoma viral (v-fgr) oncogene homolog (FGR), transcript variant 3, mRNA.	FGR	2	hg19_cpg_islands	40	FGR	hg19_genes_exons
chr11:67171001-67172000	ILMN_1710434	11	67171383	67177561	TBC1D10C	-0.394277	0.0815545	2.47e-06	0.0130634	-0.29162	7.23e-06	0.0288959	229	0.650282	0.156715	ILMN_1710434	374403	TBC1D10C	TBC1 domain family, member 10C (TBC1D10C), mRNA.	TBC1D10C	2	hg19_cpg_shores	20	TBC1D10C	hg19_genes_promoters
chr19:18480001-18481000	ILMN_1788099	19	18417039	18434001	LSM4	0.363771	0.0816721	1.32776e-05	0.0402095	0.29065	7.43e-06	0.0288959	230	0.68726	0.135303	ILMN_1788099	25804	LSM4	LSM4 homolog, U6 small nuclear RNA associated (S. cerevisiae) (LSM4), mRNA.	LSM4	1	hg19_cpg_inter	7	PGPEP1	hg19_genes_exons
chr6:168442001-168443000	ILMN_1676679	6	168418552	168445769	KIF25	-0.713558	0.144848	1.62e-06	0.00941478	-0.28971	1.4e-05	0.0418872	218	0.733914	0.192212	ILMN_1676679	3834	KIF25	kinesin family member 25 (KIF25), transcript variant 2, mRNA.	KIF25	1	hg19_cpg_inter	8	KIF25	hg19_genes_exons
chr10:129949001-129950000	ILMN_1734543	10	129845812	129884164	PTPRE	0.699774	0.157686	1.42338e-05	0.0412681	0.28664	1e-05	0.0350953	230	0.720712	0.0757534	ILMN_1734543	5791	PTPRE	protein tyrosine phosphatase, receptor type, E (PTPRE), transcript variant 2, mRNA.	PTPRE	2	hg19_cpg_islands	1		hg19_genes_intergenic
chr6:168442001-168443000	ILMN_1665903	6	168418552	168445769	KIF25	-0.694471	0.148156	4.79e-06	0.0188951	-0.28662	1.7e-05	0.0491802	218	0.733914	0.192212	ILMN_1665903	3834	KIF25	kinesin family member 25 (KIF25), transcript variant 1, mRNA.		1	hg19_cpg_inter	8	KIF25	hg19_genes_exons
chr6:35286001-35287000	ILMN_2145280	6	35265594	35289548	DEF6	0.196613	0.0421761	5.37e-06	0.0205266	0.28661	6.4e-05	0.0965805	189	0.234931	0.206686	ILMN_2145280	50619	DEF6	differentially expressed in FDCP 6 homolog (mouse) (DEF6), mRNA.	DEF6	1	hg19_cpg_inter	12	DEF6	hg19_genes_exons
chr16:28518001-28519000	ILMN_1697925	16	28505969	28510291	APOB48R	-0.211796	0.0393995	1.91e-07	0.00181995	-0.28536	1.1e-05	0.0375275	230	0.727272	0.113959	ILMN_1697925	55911	APOB48R	apolipoprotein B48 receptor (APOB48R), mRNA.	APOBR	1	hg19_cpg_inter	6	IL27	hg19_genes_promoters
chr1:153486001-153487000	ILMN_1684306	1	153516094	153518282	S100A4	-0.966982	0.216286	1.23549e-05	0.0392691	-0.28349	1.3e-05	0.0408373	230	0.728233	0.103598	ILMN_1684306	6275	S100A4	S100 calcium binding protein A4 (S100A4), transcript variant 2, mRNA.	S100A4	1	hg19_cpg_inter	1		hg19_genes_intergenic
chr17:1054001-1055000	ILMN_1672878	17	906757	1012340	ABR	0.393997	0.0901093	1.87842e-05	0.0463742	0.28234	1.4e-05	0.0418872	230	0.549067	0.15022	ILMN_1672878	29	ABR	active BCR-related gene (ABR), transcript variant 2, mRNA.	ABR	1	hg19_cpg_inter	2	ABR	hg19_genes_introns
chr19:53597001-53598000	ILMN_2312149	19	53569866	53606687	ZNF160	-0.374658	0.0750151	1.18e-06	0.0074234	-0.282	1.4e-05	0.042164	230	0.771402	0.101274	ILMN_2312149	90338	ZNF160	zinc finger protein 160 (ZNF160), transcript variant 1, mRNA.		1	hg19_cpg_inter	4	ZNF160	hg19_genes_introns
chr18:21178001-21179000	ILMN_2075643	18	21179977	21242849	ANKRD29	0.65204	0.14946	1.95774e-05	0.0471999	0.28141	1.5e-05	0.0425993	230	0.890745	0.073431	ILMN_2075643	147463	ANKRD29	ankyrin repeat domain 29 (ANKRD29), mRNA.	ANKRD29	1	hg19_cpg_inter	1		hg19_genes_intergenic
chr19:20829001-20830000	ILMN_1794823	19	20827508	20844402	ZNF626	0.195382	0.0388399	1e-06	0.0070954	0.28073	5e-05	0.0875727	203	0.930402	0.129854	ILMN_1794823	199777	ZNF626	zinc finger protein 626 (ZNF626), transcript variant 2, mRNA.	ZNF626	1	hg19_cpg_inter	9	ZNF626	hg19_genes_exons
chr22:22271001-22272000	ILMN_2235283	22	22123318	22221970	MAPK1	0.148596	0.0340432	1.93891e-05	0.0471999	0.27873	6.7e-05	0.0997033	199	0.405476	0.235401	ILMN_2235283	5594	MAPK1	mitogen-activated protein kinase 1 (MAPK1), transcript variant 2, mRNA.	MAPK1	1	hg19_cpg_inter	1		hg19_genes_intergenic
chr1:27941001-27942000	ILMN_1795158	1	27938800	27961727	FGR	0.901552	0.194431	6e-06	0.0225645	0.27801	1.9e-05	0.0518384	230	0.435031	0.120507	ILMN_1795158	2268	FGR	Gardner-Rasheed feline sarcoma viral (v-fgr) oncogene homolog (FGR), transcript variant 1, mRNA.	FGR	2	hg19_cpg_islands	40	FGR	hg19_genes_exons
chr22:37881001-37882000	ILMN_1687306	22	37966252	37976024	LGALS2	-0.275981	0.059659	6.29e-06	0.0233205	-0.27733	2.1e-05	0.054587	229	0.390112	0.135909	ILMN_1687306	3957	LGALS2	lectin, galactoside-binding, soluble, 2 (LGALS2), mRNA.	LGALS2	1	hg19_cpg_inter	10	MFNG	hg19_genes_5UTRs
chr17:7757001-7758000	ILMN_1757129	17	7758383	7759417	TMEM88	-1.15761	0.259481	1.28747e-05	0.0398893	-0.27643	2.1e-05	0.0549266	230	0.773117	0.0522397	ILMN_1757129	92162	TMEM88	transmembrane protein 88 (TMEM88), mRNA.	TMEM88	2	hg19_cpg_islands	9	TMEM88	hg19_genes_promoters
chr22:18260001-18261000	ILMN_1763386	22	18216905	18256808	BID	-0.382948	0.0867425	1.56999e-05	0.0440362	-0.27561	2.2e-05	0.0573522	230	0.378192	0.0874437	ILMN_1763386	637	BID	BH3 interacting domain death agonist (BID), transcript variant 1, mRNA.	BID	1	hg19_cpg_shelves	9	BID	hg19_genes_1to5kb
chr7:144433001-144434000	ILMN_1804629	7	144149033	144533146	TPK1	0.299436	0.0625998	3.12e-06	0.0146393	0.27385	7.7e-05	0.106834	203	0.333755	0.136899	ILMN_1804629	27010	TPK1	thiamin pyrophosphokinase 1 (TPK1), transcript variant 2, mRNA.	TPK1	1	hg19_cpg_inter	7	TPK1	hg19_genes_exons
chr19:15568001-15569000	ILMN_1795089	19	15562437	15575382	RASAL3	0.410811	0.084432	2.15e-06	0.0118407	0.27322	2.7e-05	0.063779	230	0.40113	0.151109	ILMN_1795089	64926	RASAL3	RAS protein activator like 3 (RASAL3), mRNA.	RASAL3	2	hg19_cpg_islands	5	RASAL3	hg19_genes_exons
chr11:67909001-67910000	ILMN_1691151	11	67820325	67888858	CHKA	0.142156	0.0319417	1.34806e-05	0.0403326	0.27088	7.6e-05	0.105737	208	0.527483	0.21627	ILMN_1691151	1119	CHKA	choline kinase alpha (CHKA), transcript variant 2, mRNA.	CHKA	1	hg19_cpg_inter	1		hg19_genes_intergenic
chr15:40583001-40584000	ILMN_1724066	15	40580097	40600174	PLCB2	0.370939	0.0829169	1.22078e-05	0.0392691	0.26915	3.5e-05	0.0743282	230	0.341398	0.153803	ILMN_1724066	5330	PLCB2	phospholipase C, beta 2 (PLCB2), mRNA.	PLCB2	3	hg19_cpg_islands	48	PLCB2	hg19_genes_promoters
chr19:7805001-7806000	ILMN_1676372	19	7804880	7812464	CD209	-1.3235	0.275885	2.93e-06	0.0144635	-0.26551	4.5e-05	0.0857899	230	0.809671	0.0604267	ILMN_1676372	30835	CD209	CD209 molecule (CD209), mRNA.	CD209	1	hg19_cpg_inter	24	CD209	hg19_genes_exons
chr17:80061001-80062000	ILMN_1681437	17	79993756	79995573	DCXR	-0.41234	0.0928027	1.39084e-05	0.0411169	-0.26512	4.7e-05	0.0857899	230	0.533799	0.141803	ILMN_1681437	51181	DCXR	dicarbonyl/L-xylulose reductase (DCXR), mRNA.	DCXR	1	hg19_cpg_shelves	2	CCDC57	hg19_genes_introns
chr7:27183001-27184000	ILMN_1677018	7	27168125	27170399	HOXA4	-0.34581	0.0736245	4.59e-06	0.0188951	-0.26498	4.7e-05	0.0859672	230	0.296296	0.113315	ILMN_1677018	3201	HOXA4	homeobox A4 (HOXA4), mRNA.	HOXA4	1	hg19_cpg_islands	6	HOXA5	hg19_genes_promoters
chr13:100644001-100645000	ILMN_1870668	13	100725577	100725837		0.520515	0.102218	7.48e-07	0.00580235	0.26214	5.7e-05	0.0944992	230	0.0928005	0.04471	ILMN_1870668			NISC_gj03f04.y1 NCI_CGAP_Pr28 cDNA clone IMAGE:3270678 5, mRNA sequence		1	hg19_cpg_shores	1		hg19_genes_intergenic
chr10:129864001-129865000	ILMN_2383611	10	129845812	129884164	PTPRE	-0.86677	0.196908	1.65819e-05	0.0444967	-0.26029	6.5e-05	0.0972135	230	0.880609	0.0755552	ILMN_2383611	5791	PTPRE	protein tyrosine phosphatase, receptor type, E (PTPRE), transcript variant 2, mRNA.	PTPRE	1	hg19_cpg_inter	24	PTPRE	hg19_genes_exons
chr21:46378001-46379000	ILMN_1654396	21	46305867	46340965	ITGB2	1.08193	0.245853	1.66643e-05	0.0444967	0.26022	6.5e-05	0.0972135	230	0.485963	0.143208	ILMN_1654396	3689	ITGB2	integrin, beta 2 (antigen CD18 (p95), lymphocyte function-associated antigen 1; macrophage antigen 1 (mac-1) beta subunit) (ITGB2), mRNA.	ITGB2	3	hg19_cpg_islands	2	FAM207A	hg19_genes_introns
chr21:46378001-46379000	ILMN_2175912	21	46305867	46340965	ITGB2	1.07703	0.246134	1.85198e-05	0.0463742	0.25844	7.3e-05	0.105114	230	0.485963	0.143208	ILMN_2175912	3689	ITGB2	integrin, beta 2 (complement component 3 receptor 3 and 4 subunit) (ITGB2), mRNA.	ITGB2	3	hg19_cpg_islands	2	FAM207A	hg19_genes_introns
chr11:67171001-67172000	ILMN_1653220	11	67259238	67272843	PITPNM1	-0.233958	0.0507204	6.67e-06	0.0243609	-0.25392	0.000102	0.123277	229	0.650282	0.156715	ILMN_1653220	9600	PITPNM1	phosphatidylinositol transfer protein, membrane-associated 1 (PITPNM1), mRNA.	PITPNM1	2	hg19_cpg_shores	20	TBC1D10C	hg19_genes_promoters
chr9:34377001-34378000	ILMN_2365023	9	34379016	34381598	C9orf24	0.413242	0.0877333	4.33e-06	0.0182279	0.25262	0.000107	0.12626	230	0.0826757	0.0566837	ILMN_2365023	84688	C9orf24	chromosome 9 open reading frame 24 (C9orf24), transcript variant 2, mRNA.	C9orf24	4	hg19_cpg_islands	3	MYORG	hg19_genes_promoters
chr4:111562001-111563000	ILMN_2391400	4	111538579	111563279	PITX2	0.266448	0.0564973	4.22e-06	0.0180583	0.25253	0.000108	0.12626	230	0.254286	0.0738259	ILMN_2391400	5308	PITX2	paired-like homeodomain 2 (PITX2), transcript variant 1, mRNA.	PITX2	2	hg19_cpg_shores	5	PITX2	hg19_genes_introns
chr22:37908001-37909000	ILMN_1687306	22	37966252	37976024	LGALS2	0.250206	0.0554065	1.01777e-05	0.0336985	0.25029	0.000125	0.136165	230	0.277017	0.146842	ILMN_1687306	3957	LGALS2	lectin, galactoside-binding, soluble, 2 (LGALS2), mRNA.	LGALS2	1	hg19_cpg_shelves	4	CARD10	hg19_genes_introns
chr2:60666001-60667000	ILMN_2255133	2	60684328	60780633	BCL11A	-0.149369	0.0303264	1.63e-06	0.00941478	-0.24933	0.000541	0.240629	189	0.631261	0.199802	ILMN_2255133	53335	BCL11A	B-cell CLL/lymphoma 11A (zinc finger protein) (BCL11A), transcript variant 1, mRNA.	BCL11A	1	hg19_cpg_inter	1		hg19_genes_intergenic
chr19:6735001-6736000	ILMN_1717334	19	6772678	6857377	VAV1	0.199342	0.0432993	6.94e-06	0.0245627	0.24254	0.000204	0.166425	230	0.60956	0.126681	ILMN_1717334	7409	VAV1	vav 1 guanine nucleotide exchange factor (VAV1), mRNA.	VAV1	2	hg19_cpg_shores	12	GPR108	hg19_genes_exons
chr12:57834001-57835000	ILMN_2382657	12	57866037	57871728	ARHGAP9	-0.343695	0.0770828	1.30112e-05	0.0398893	-0.24217	0.000209	0.167857	230	0.701818	0.147378	ILMN_2382657	64333	ARHGAP9	Rho GTPase activating protein 9 (ARHGAP9), transcript variant 3, mRNA.	ARHGAP9	1	hg19_cpg_inter	1	INHBC	hg19_genes_introns
chr12:57834001-57835000	ILMN_1663916	12	57866037	57873424	ARHGAP9	-0.615606	0.140824	1.88614e-05	0.0463742	-0.23888	0.000256	0.180513	230	0.701818	0.147378	ILMN_1663916	64333	ARHGAP9	Rho GTPase activating protein 9 (ARHGAP9), transcript variant 2, mRNA.	ARHGAP9	1	hg19_cpg_inter	1	INHBC	hg19_genes_introns
chr22:37608001-37609000	ILMN_3238196	22	37678494	37711389	CYTH4	0.773938	0.175386	1.58333e-05	0.0440362	0.22317	0.000651	0.25475	230	0.362803	0.0924105	ILMN_3238196	27128	CYTH4	cytohesin 4 (CYTH4), mRNA.	CYTH4	1	hg19_cpg_inter	6	SSTR3	hg19_genes_promoters
chr3:8809001-8810000	ILMN_1804929	3	8792094	8811300	OXTR	1.39945	0.266472	3.49e-07	0.00309144	0.21447	0.001091	0.311263	229	0.00760863	0.0138984	ILMN_1804929	5021	OXTR	oxytocin receptor (OXTR), mRNA.	OXTR	1	hg19_cpg_islands	4	OXTR	hg19_genes_5UTRs
chr11:1051001-1052000	ILMN_1803779	11	925808	1012245	AP2A2	0.233253	0.0514839	9.55e-06	0.0320351	0.21112	0.001279	0.330254	230	0.183536	0.119204	ILMN_1803779	161	AP2A2	adaptor-related protein complex 2, alpha 2 subunit (AP2A2), mRNA.	AP2A2	1	hg19_cpg_inter	1		hg19_genes_intergenic

## Sheet: table-S3
Supplementary Table-3: CpG sites associated with Matsuda insulin sensitivity index (from OGTT)
A total of 26 CpG sites are significantly associated at FDR-P<0.05. Results for CpG sites associated with Matsuda index at FDR-P<0.1 in epigenome wide association study (EWAS) are shown.
Results are sorted by EWAS p-value.
EWAS							Methylation Level			ANNOTATR CpG_site annotation					ChromHMM_15state annotation			FALCAN annotation		UCSC allSNP151								RRBS seq-coverage
CpG_site	Beta	StdErr	R2_full	adj_R2_full	P-value	FDR_P	N	Mean	StDev	CpG_site	annottype_CpG	CountOfgene annotation	annotsymbol	annottype	E063_adipose-nuclei	E023_Mesenchymal Stem Cell Derived Adipocyte Cultured Cells	E025_Adipose Derived Mesenchymal Stem Cell Cultured Cells	snpName	nearestReferenceSNP	name	strand	refNCBI	refUCSC	observed	valid	avHet	avHetSE	CpG site	CpG_strand	mean_cov (X)	sd_cov
chr8:125774328	1.3303	0.217246	0.211459	0.195844	4.69688e-09	0.00281653	212	0.337502	0.211162	chr8:125774328	hg19_cpg_inter	1		hg19_genes_intergenic	Quiescent/Low	Enhancers	Enhancers	rs902542288		rs902542288	+	G	G	A/G	unknown	0	0	chr8:125774328	-	40.434	16.0936
chr18:2351365	-3.09608	0.510689	0.194098	0.179379	5.80046e-09	0.00281653	229	0.950517	0.0864899	chr18:2351365	hg19_cpg_inter	1		hg19_genes_intergenic	Quiescent/Low	Quiescent/Low	Quiescent/Low	none	rs577432331(1bp)	none		NA	NA	No SNP				chr18:2351365	+	64.869	26.5708
chr9:133807687	-1.27214	0.213283	0.193299	0.17836	9.91609e-09	0.00281653	226	0.35792	0.214168	chr9:133807687	hg19_cpg_shelves	3	FIBCD1	hg19_genes_introns	Bivalent Enhancer	Enhancers	Enhancers	rs1223242541		rs1223242541	+	C	C	C/G	unknown	0	0	chr9:133807687	+	37.8673	14.2271
chr2:122447179	-1.96297	0.330663	0.188187	0.173427	1.12346e-08	0.00281653	230	0.378346	0.137943	chr2:122447179	hg19_cpg_inter	1	NIFK-AS1	hg19_genes_introns	Quiescent/Low	Quiescent/Low	Quiescent/Low	rs559275484		rs559275484	+	C	C	C/T	by-1000genomes	0.000399	0.014124	chr2:122447179	+	121.496	46.3334
chr20:62695542	-1.25586	0.210785	0.214427	0.196773	1.33563e-08	0.00281653	188	0.325913	0.246572	chr20:62695542	hg19_cpg_shores	4	TCEA2	hg19_genes_introns	Flanking Active TSS	Flanking Active TSS	Flanking Active TSS	rs968386121		rs968386121	+	G	G	A/G	unknown	0	0	chr20:62695542	-	29.3404	12.2274
chr16:11503467	-2.28704	0.396419	0.183796	0.16875	2.72327e-08	0.00478564	227	0.438627	0.115027	chr16:11503467	hg19_cpg_inter	1		hg19_genes_intergenic	Enhancers	Enhancers	Weak transcription	rs572157753		rs572157753	+	C	C	C/T	by-1000genomes	0.000399	0.014124	chr16:11503467	+	297.269	91.4798
chr11:2930552	-1.3053	0.236022	0.204806	0.185872	1.20296e-07	0.0181198	178	0.35221	0.217644	chr11:2930552	hg19_cpg_islands	4	SLC22A18	hg19_genes_exons	Enhancers	Quiescent/Low	Weak transcription	rs898613990		rs898613990	+	G	G	A/G/T	unknown	0	0	chr11:2930552	-	25.6011	9.08301
chr6:29600794	25.0298	4.68877	0.166152	0.150991	2.33199e-07	0.0283078	230	0.00401978	0.00951732	chr6:29600794	hg19_cpg_shores	12	GABBR1	hg19_genes_promoters	Active TSS	Active TSS	Active TSS	none	rs1041877655(1bp)	none		NA	NA	No SNP				chr6:29600794	-	192.248	51.3808
chr2:177028656	1.05209	0.19702	0.176478	0.160716	2.41628e-07	0.0283078	219	0.573251	0.235773	chr2:177028656	hg19_cpg_shores	1	HOXD3	hg19_genes_promoters	Weak Repressed PolyComb	Quiescent/Low	Weak transcription	rs114468054		rs114468054	+	G	G	A/G	by-frequency,by-1000genomes	0.000798	0.019964	chr2:177028656	-	33.8767	12.0773
chr13:110918609	-1.16696	0.221022	0.194171	0.175752	3.79827e-07	0.0400485	183	0.335022	0.225897	chr13:110918609	hg19_cpg_islands	1	COL4A1	hg19_genes_introns	Enhancers	Weak transcription	Quiescent/Low	rs755820530		rs755820530	+	G	G	A/G/T	unknown	0	0	chr13:110918609	-	32.377	14.7061
chr15:58737130	-1.42949	0.275757	0.160666	0.145405	4.91546e-07	0.0450478	230	0.512946	0.169583	chr15:58737130	hg19_cpg_inter	5	LIPC	hg19_genes_introns	Enhancers	Enhancers	Enhancers	rs191095225		rs191095225	+	G	G	A/G	by-cluster,by-frequency,by-1000genomes	0.002792	0.037256	chr15:58737130	-	62.3217	18.5277
chr13:110918621	-1.18639	0.228231	0.19155	0.172965	5.59649e-07	0.0450478	182	0.344156	0.219566	chr13:110918621	hg19_cpg_islands	1	COL4A1	hg19_genes_introns	Enhancers	Weak transcription	Quiescent/Low	rs61963337		rs61963337	+	G	G	A/G	by-cluster,by-frequency,by-1000genomes	0.223522	0.248594	chr13:110918621	-	32.3736	14.6541
chr20:31490466	5.26613	1.01551	0.176651	0.157938	5.8695e-07	0.0450478	186	0.0133052	0.0494185	chr20:31490466	hg19_cpg_inter	1		hg19_genes_intergenic	Quiescent/Low	Weak Repressed PolyComb	Weak Repressed PolyComb	rs559736430		rs559736430	+	G	G	A/G	by-1000genomes	0.000399	0.014124	chr20:31490466	-	29.4462	11.4976
chr7:33814437	1.32845	0.259021	0.168108	0.151796	6.7644e-07	0.0450478	213	0.826047	0.185569	chr7:33814437	hg19_cpg_inter	1		hg19_genes_intergenic	Enhancers	Flanking Active TSS	Enhancers	rs576932625		rs576932625	+	G	G	A/G	by-1000genomes	0.000399	0.014124	chr7:33814437	-	35.493	15.569
chr2:177028622	1.04441	0.203834	0.168559	0.152646	6.7952e-07	0.0450478	219	0.644107	0.22902	chr2:177028622	hg19_cpg_shores	1	HOXD3	hg19_genes_promoters	Weak Repressed PolyComb	Quiescent/Low	Weak transcription	none	rs185567623(5bp)	none		NA	NA	No SNP				chr2:177028622	-	33.9269	12.109
chr6:7706969	2.37428	0.466712	0.156349	0.14087	7.82649e-07	0.0450478	228	0.666201	0.101027	chr6:7706969	hg19_cpg_inter	1		hg19_genes_intergenic	Quiescent/Low	Quiescent/Low	Weak transcription	rs1312132872		rs1312132872	+	G	G	A/G	unknown	0	0	chr6:7706969	-	322.526	83.5671
chr17:7757500	-2.98165	0.586451	0.15594	0.140164	8.04463e-07	0.0450478	223	0.686202	0.0867957	chr17:7757500	hg19_cpg_islands	4	TMEM88	hg19_genes_promoters	Weak transcription	Weak transcription	Weak transcription	none	rs1313634607(2bp)	none		NA	NA	No SNP				chr17:7757500	-	321.014	83.7746
chr19:773255	-1.04158	0.202963	0.216072	0.196835	8.07839e-07	0.0450478	172	0.606562	0.25405	chr19:773255	hg19_cpg_inter	1		hg19_genes_intergenic	Quiescent/Low	Quiescent/Low	Quiescent/Low	none	rs1007216141(1bp)	none		NA	NA	No SNP				chr19:773255	+	24.7616	8.78104
chr8:145900817	1.184	0.233227	0.163048	0.147477	8.31107e-07	0.0450478	225	0.648306	0.202515	chr8:145900817	hg19_cpg_inter	1	ARHGAP39	hg19_genes_introns	Weak transcription	Quiescent/Low	Weak transcription	rs780774932		rs780774932	+	C	C	C/G/T	unknown	0	0	chr8:145900817	+	39.12	15.6399
chr14:103470462	-0.963048	0.189575	0.16079	0.142446	9.25715e-07	0.0450478	193	0.505315	0.250997	chr14:103470462	hg19_cpg_inter	2	CDC42BPB	hg19_genes_intronexonboundaries	Genic enhancers	Strong transcription	Strong transcription	rs1045901889		rs1045901889	+	G	G	A/G	unknown	0	0	chr14:103470462	-	29.1295	11.9294
chr1:16489314	1.32936	0.263565	0.156166	0.140753	9.5685e-07	0.0450478	229	0.685349	0.175054	chr1:16489314	hg19_cpg_inter	1		hg19_genes_intergenic	Quiescent/Low	Weak Repressed PolyComb	Weak Repressed PolyComb	rs576122948		rs576122948	+	G	G	C/G	by-1000genomes	0.000399	0.014124	chr1:16489314	-	64.0917	24.0098
chr17:44909667	-1.95362	0.387833	0.155541	0.140187	9.83312e-07	0.0450478	230	0.712423	0.12123	chr17:44909667	hg19_cpg_inter	1		hg19_genes_intergenic	Enhancers	Enhancers	Weak Repressed PolyComb	rs1019443194		rs1019443194	+	C	C	C/T	unknown	0	0	chr17:44909667	+	109.791	35.8271
chr3:16596707	-1.16331	0.231274	0.165165	0.149488	1.04032e-06	0.0450478	223	0.45469	0.202962	chr3:16596707	hg19_cpg_inter	1		hg19_genes_intergenic	Quiescent/Low	Weak Repressed PolyComb	Weak Repressed PolyComb	rs532416908		rs532416908	+	C	C	C/T	by-cluster,by-frequency,by-1000genomes	0.000798	0.019964	chr3:16596707	+	47.6099	19.4247
chr2:128644077	21.6475	4.2812	0.197394	0.179459	1.05091e-06	0.0450478	188	0.00141066	0.0111948	chr2:128644077	hg19_cpg_islands	2	AMMECR1L	hg19_genes_promoters	Active TSS	Active TSS	Active TSS	rs937250873		rs937250873	+	C	C	A/C	unknown	0	0	chr2:128644077	+	27.9362	11.6287
chr22:51169809	-1.12646	0.222935	0.169983	0.151435	1.0681e-06	0.0450478	188	0.516411	0.231391	chr22:51169809	hg19_cpg_islands	2	SHANK3	hg19_genes_exons	Weak Repressed PolyComb	Weak Repressed PolyComb	Repressed PolyComb	none	rs1410602790(11bp)	none		NA	NA	No SNP				chr22:51169809	-	25.7181	9.18906
chr5:179473873	-2.22045	0.443231	0.154586	0.139215	1.11857e-06	0.0453617	230	0.76347	0.106503	chr5:179473873	hg19_cpg_inter	2	RNF130	hg19_genes_introns	Enhancers	Weak transcription	Weak transcription	none	rs1269859158(1bp)	none		NA	NA	No SNP				chr5:179473873	+	183.839	57.8628
chr17:7915945	-1.33306	0.268253	0.156521	0.140901	1.36528e-06	0.0533161	226	0.765135	0.17053	chr17:7915945	hg19_cpg_shelves	2	GUCY2D	hg19_genes_intronexonboundaries	Weak Repressed PolyComb	Repressed PolyComb	Repressed PolyComb	rs184164679		rs184164679	+	C	C	A/C/T	by-cluster,by-frequency,by-1000genomes	0.000288	0.01199	chr17:7915945	+	42.0531	14.9392
chr7:45068297	1.88575	0.380957	0.152532	0.137123	1.47552e-06	0.0555631	230	0.724078	0.123823	chr7:45068297	hg19_cpg_inter	7	CCM2	hg19_genes_introns	Active TSS	Strong transcription	Weak transcription	rs979454090		rs979454090	+	C	C	C/T	unknown	0	0	chr7:45068297	+	145.113	42.4625
chr16:10933307	-1.01022	0.203616	0.175045	0.156914	1.59941e-06	0.0576073	190	0.375818	0.238136	chr16:10933307	hg19_cpg_inter	1		hg19_genes_intergenic	Weak Repressed PolyComb	Weak Repressed PolyComb	Weak Repressed PolyComb	rs1004302151		rs1004302151	+	C	C	C/G/T	unknown	0	0	chr16:10933307	+	27.2526	10.1517
chr7:101343795	-1.08064	0.218789	0.160092	0.143377	1.6468e-06	0.0576073	211	0.425924	0.215897	chr7:101343795	hg19_cpg_inter	1		hg19_genes_intergenic	Repressed PolyComb	Repressed PolyComb	Repressed PolyComb	rs1489982943		rs1489982943	+	C	C	C/T	unknown	0	0	chr7:101343795	+	32.8199	12.6779
chr10:6260758	-2.30667	0.468961	0.151545	0.136048	1.70993e-06	0.0576073	229	0.899236	0.0976318	chr10:6260758	hg19_cpg_shores	5	PFKFB3	hg19_genes_introns	Strong transcription	Strong transcription	Strong transcription	rs975166979		rs975166979	+	G	G	A/G	unknown	0	0	chr10:6260758	-	67.821	23.6632
chr19:45261396	-1.23728	0.251989	0.151163	0.13573	1.77407e-06	0.0576073	230	0.40826	0.184029	chr19:45261396	hg19_cpg_islands	2	BCL3	hg19_genes_intronexonboundaries	Transcr. at gene 5' and 3'	Transcr. at gene 5' and 3'	Transcr. at gene 5' and 3'	none	rs893088899(1bp)	none		NA	NA	No SNP				chr19:45261396	-	75.687	23.269
chr9:130517111	-1.28463	0.261618	0.150401	0.134521	1.80298e-06	0.0576073	223	0.307583	0.177011	chr9:130517111	hg19_cpg_islands	7	SH2D3C	hg19_genes_introns	Bivalent Enhancer	Repressed PolyComb	Repressed PolyComb	rs1318244748		rs1318244748	+	G	G	A/G/T	unknown	0	0	chr9:130517111	-	43.0134	14.8262
chr5:140871486	1.15674	0.236587	0.154286	0.138625	1.9735e-06	0.0612011	226	0.64918	0.197373	chr5:140871486	hg19_cpg_islands	24	PCDHGA1	hg19_genes_introns	Genic enhancers	Weak transcription	Strong transcription	rs1177043977		rs1177043977	+	C	C	A/C/G	unknown	0	0	chr5:140871486	+	39.469	13.348
chr10:3138671	1.27814	0.261783	0.154903	0.139107	2.04817e-06	0.0617017	224	0.762686	0.175271	chr10:3138671	hg19_cpg_inter	3	PFKP	hg19_genes_introns	Flanking Active TSS	Enhancers	Enhancers	rs1207756599		rs1207756599	+	G	G	A/G	unknown	0	0	chr10:3138671	-	35.9062	12.6287
chr7:28850020	-2.5066	0.51645	0.192432	0.174585	2.609e-06	0.0737592	191	0.95391	0.0990977	chr7:28850020	hg19_cpg_inter	4	CREB5	hg19_genes_introns	Weak transcription	Weak transcription	Weak transcription	rs537535763		rs537535763	+	C	C	A/C/T	by-frequency,by-1000genomes	0.000798	0.019964	chr7:28850020	+	27.4869	10.5775
chr19:42654947	-2.11934	0.440248	0.147902	0.132409	2.74986e-06	0.0737592	230	0.285693	0.106131	chr19:42654947	hg19_cpg_inter	0			Repressed PolyComb	Repressed PolyComb	Repressed PolyComb	rs978664792		rs978664792	+	G	G	A/G	unknown	0	0	chr19:42654947	-	253.048	78.0196
chr13:110918595	-1.08475	0.224087	0.176126	0.157295	2.8286e-06	0.0737592	183	0.325738	0.225083	chr13:110918595	hg19_cpg_islands	1	COL4A1	hg19_genes_introns	Genic enhancers	Strong transcription	Quiescent/Low	none	rs570460166(1bp)	none		NA	NA	No SNP				chr13:110918595	-	32.3661	14.6806
chr20:54951639	1.96406	0.408669	0.147633	0.132135	2.85087e-06	0.0737592	230	0.740044	0.112737	chr20:54951639	hg19_cpg_inter	8	AURKA	hg19_genes_introns	Weak transcription	Weak transcription	Weak transcription	rs919024088		rs919024088	+	C	C	C/T	unknown	0	0	chr20:54951639	+	262.926	74.9873
chr20:62695532	-1.03814	0.214735	0.167125	0.148409	2.87292e-06	0.0737592	188	0.346762	0.248632	chr20:62695532	hg19_cpg_shores	4	TCEA2	hg19_genes_introns	Flanking Active TSS	Flanking Active TSS	Flanking Active TSS	rs564948879		rs564948879	+	G	G	A/G	by-1000genomes	0.000399	0.014124	chr20:62695532	-	29.266	12.2397
chr8:130996050	-1.06051	0.219834	0.165122	0.147168	2.91881e-06	0.0737592	196	0.3676	0.219215	chr8:130996050	hg19_cpg_islands	3	FAM49B	hg19_genes_introns	Flanking Active TSS	Active TSS	Flanking Active TSS	rs1295513928		rs1295513928	+	G	G	A/G	unknown	0	0	chr8:130996050	-	28.8061	10.7505
chr17:7757475	-4.11427	0.856837	0.14956	0.133811	2.93809e-06	0.0737592	226	0.853944	0.0561125	chr17:7757475	hg19_cpg_islands	4	TMEM88	hg19_genes_promoters	Weak transcription	Weak transcription	Weak transcription	rs758253355		rs758253355	+	G	G	A/G	unknown	0	0	chr17:7757475	-	300.898	80.135
chr11:17034867	-1.95125	0.406925	0.160634	0.14457	3.086e-06	0.0756706	218	0.11407	0.11193	chr11:17034867	hg19_cpg_islands	2	PLEKHA7	hg19_genes_introns	Flanking Active TSS	Flanking Active TSS	Bivalent/Poised TSS	none	rs1007989517(6bp)	none		NA	NA	No SNP				chr11:17034867	-	40.2294	14.802
chr12:49783222	1.31928	0.275911	0.147214	0.131638	3.19194e-06	0.0764896	229	0.770312	0.166187	chr12:49783222	hg19_cpg_shores	7	LOC100335030	hg19_genes_5UTRs	Quiescent/Low	Quiescent/Low	Quiescent/Low	rs1428746273		rs1428746273	+	C	C	C/T	unknown	0	0	chr12:49783222	+	69.9607	31.4672
chr5:140683423	-1.14195	0.239227	0.14808	0.132006	3.3718e-06	0.0790041	222	0.663653	0.197706	chr5:140683423	hg19_cpg_islands	2	SLC25A2	hg19_genes_exons	ZNF genes & repeats	Heterochromatin	Heterochromatin	none	rs782237183(1bp)	none		NA	NA	No SNP				chr5:140683423	+	34.1306	13.3055
chr1:16489294	1.27787	0.268372	0.146504	0.130915	3.4918e-06	0.080037	229	0.66964	0.174149	chr1:16489294	hg19_cpg_inter	1		hg19_genes_intergenic	Quiescent/Low	Weak Repressed PolyComb	Weak Repressed PolyComb	none	rs371944308(1bp)	none		NA	NA	No SNP				chr1:16489294	-	64.2926	24.1064
chr19:45261369	-1.19781	0.251915	0.145914	0.130385	3.59003e-06	0.0801103	230	0.476304	0.181975	chr19:45261369	hg19_cpg_islands	2	BCL3	hg19_genes_intronexonboundaries	Transcr. at gene 5' and 3'	Transcr. at gene 5' and 3'	Transcr. at gene 5' and 3'	none	rs1218448681(13bp)	none		NA	NA	No SNP				chr19:45261369	-	75.3565	23.2614
chr1:155291272	-1.31536	0.27684	0.145796	0.130266	3.64695e-06	0.0801103	230	0.243819	0.167187	chr1:155291272	hg19_cpg_shores	12	RUSC1-AS1	hg19_genes_exons	Flanking Active TSS	Active TSS	Active TSS	rs761686787		rs761686787	+	G	G	A/G/T	by-cluster	0	0	chr1:155291272	-	55.9	20.9135
chr18:29232526	1.32446	0.279164	0.151511	0.135725	3.81061e-06	0.081997	225	0.655684	0.170004	chr18:29232526	hg19_cpg_inter	3	B4GALT6	hg19_genes_introns	Quiescent/Low	Quiescent/Low	Weak transcription	rs1028324491		rs1028324491	+	G	G	A/G	unknown	0	0	chr18:29232526	-	81.8978	37.7602
chr9:130607242	-1.22107	0.257896	0.145242	0.129701	3.92796e-06	0.0825854	230	0.307106	0.179654	chr9:130607242	hg19_cpg_inter	3	ENG	hg19_genes_introns	Flanking Active TSS	Enhancers	Genic enhancers	rs903747450		rs903747450	+	C	C	C/T	unknown	0	0	chr9:130607242	+	71.6652	19.9089
chr19:35745667	-1.53069	0.323878	0.144955	0.129409	4.08213e-06	0.0825854	230	0.708681	0.140913	chr19:35745667	hg19_cpg_inter	6	LSR	hg19_genes_introns	Weak Repressed PolyComb	Weak Repressed PolyComb	Weak Repressed PolyComb	rs757573066		rs757573066	+	C	C	C/T	unknown	0	0	chr19:35745667	+	69.4	20.8403
chr7:135486851	-0.961991	0.202187	0.180556	0.161388	4.14114e-06	0.0825854	179	0.568637	0.245983	chr7:135486851	hg19_cpg_inter	1		hg19_genes_intergenic	Enhancers	Weak transcription	Weak transcription	rs979114077		rs979114077	+	C	C	A/C/G/T	unknown	0	0	chr7:135486851	+	25.8045	8.95876
chr16:2954128	-1.15525	0.244337	0.159589	0.142947	4.24641e-06	0.0825854	212	0.232223	0.198619	chr16:2954128	hg19_cpg_shores	1		hg19_genes_intergenic	Flanking Active TSS	Flanking Active TSS	Flanking Active TSS	rs1028408717		rs1028408717	+	G	G	A/G	unknown	0	0	chr16:2954128	-	38.4434	14.4367
chr16:25084915	-1.22941	0.260169	0.159465	0.142984	4.27282e-06	0.0825854	214	0.751373	0.183332	chr16:25084915	hg19_cpg_inter	1		hg19_genes_intergenic	Quiescent/Low	Quiescent/Low	Quiescent/Low	rs1324517000		rs1324517000	+	C	C	C/T	unknown	0	0	chr16:25084915	+	35.7383	13.5908
chr17:80262617	-2.1818	0.462826	0.144553	0.129	4.3079e-06	0.0825854	230	0.31818	0.101765	chr17:80262617	hg19_cpg_inter	1		hg19_genes_intergenic	Weak Repressed PolyComb	Weak Repressed PolyComb	Weak Repressed PolyComb	rs1326767649		rs1326767649	+	G	G	A/G	unknown	0	0	chr17:80262617	-	166.004	45.3762
chr10:851018	1.1158	0.237126	0.149717	0.133824	4.54309e-06	0.0836106	224	0.542752	0.197602	chr10:851018	hg19_cpg_shores	1		hg19_genes_intergenic	Weak transcription	Weak transcription	Weak transcription	rs908601383		rs908601383	+	G	G	A/G	unknown	0	0	chr10:851018	-	44.1429	17.166
chr7:75618759	-1.12088	0.238236	0.140119	0.124121	4.54332e-06	0.0836106	225	0.370155	0.197126	chr7:75618759	hg19_cpg_inter	4	TMEM120A	hg19_genes_introns	Flanking Active TSS	Enhancers	Enhancers	none	rs561511588(1bp)	none		NA	NA	No SNP				chr7:75618759	+	41.4622	15.9732
chr13:113926945	2.4983	0.531625	0.144064	0.128502	4.59928e-06	0.0836106	230	0.782561	0.0874594	chr13:113926945	hg19_cpg_inter	1		hg19_genes_intergenic	Weak transcription	Enhancers	Genic enhancers	rs1458744462		rs1458744462	+	G	G	A/G/T	unknown	0	0	chr13:113926945	-	242.839	66.3292
chr7:157478795	1.20526	0.256679	0.14666	0.129678	4.91635e-06	0.0878599	211	0.2168	0.186444	chr7:157478795	hg19_cpg_islands	5	PTPRN2	hg19_genes_introns	Repressed PolyComb	Repressed PolyComb	Repressed PolyComb	none	rs907611260(1bp)	none		NA	NA	No SNP				chr7:157478795	+	31.8341	10.617
chr20:46486513	-1.47055	0.314203	0.1436	0.127592	5.08107e-06	0.0880154	224	0.142167	0.147726	chr20:46486513	hg19_cpg_inter	1		hg19_genes_intergenic	Flanking Active TSS	Enhancers	Enhancers	rs1172463949		rs1172463949	+	C	C	C/T	unknown	0	0	chr20:46486513	+	51.4152	22.6609
chr15:32872042	1.54186	0.328922	0.15961	0.142886	5.092e-06	0.0880154	211	0.791821	0.145747	chr15:32872042	hg19_cpg_inter	2	LINC02256	hg19_genes_exons	Quiescent/Low	Quiescent/Low	Quiescent/Low	none	rs1398590738(1bp)	none		NA	NA	No SNP				chr15:32872042	+	59.6635	27.3157
chr15:75019303	-1.01719	0.217454	0.154557	0.138376	5.20484e-06	0.0885147	219	0.324505	0.217288	chr15:75019303	hg19_cpg_islands	8	CYP1A1	hg19_genes_1to5kb	Flanking Bivalent TSS/Enh	Repressed PolyComb	Flanking Bivalent TSS/Enh	none	rs1215956157(1bp)	none		NA	NA	No SNP				chr15:75019303	-	34.3059	13.6755
chr12:58131784	-1.0698	0.228225	0.164854	0.146797	5.35233e-06	0.0886487	195	0.309843	0.21675	chr12:58131784	hg19_cpg_islands	3	AGAP2	hg19_genes_exons	Flanking Bivalent TSS/Enh	Weak Repressed PolyComb	Repressed PolyComb	rs752991698		rs752991698	+	G	G	A/G	unknown	0.000827	0.020315	chr12:58131784	-	27.0359	9.76865
chr4:81128131	-1.33826	0.286835	0.145736	0.129989	5.38087e-06	0.0886487	227	0.279806	0.16295	chr4:81128131	hg19_cpg_shores	1		hg19_genes_intergenic	Flanking Active TSS	Flanking Active TSS	Flanking Active TSS	none	rs1452522001(1bp)	none		NA	NA	No SNP				chr4:81128131	+	51.4934	17.204
chr19:35745655	-1.45342	0.312928	0.14225	0.126655	5.8624e-06	0.095096	230	0.698344	0.146255	chr19:35745655	hg19_cpg_inter	6	LSR	hg19_genes_introns	Weak Repressed PolyComb	Weak Repressed PolyComb	Weak Repressed PolyComb	rs1389949667		rs1389949667	+	C	C	C/T	unknown	0	0	chr19:35745655	+	69.1087	20.7548
chr12:68826353	-1.90337	0.410493	0.141993	0.126393	6.06745e-06	0.0956566	230	0.78852	0.112568	chr12:68826353	hg19_cpg_inter	1		hg19_genes_intergenic	Quiescent/Low	Quiescent/Low	Quiescent/Low	rs1037053408		rs1037053408	+	G	G	A/G	unknown	0	0	chr12:68826353	-	121.296	41.4938
chr2:10954509	-1.00303	0.215487	0.169534	0.151578	6.172e-06	0.0956566	195	0.405609	0.22465	chr2:10954509	hg19_cpg_shores	5	PDIA6	hg19_genes_introns	Flanking Active TSS	Weak transcription	Weak Repressed PolyComb	rs545270606		rs545270606	+	C	C	C/T	by-frequency,by-1000genomes	0.000798	0.019964	chr2:10954509	+	26.6205	9.01657
chr9:131397881	-1.10055	0.236731	0.148044	0.129917	6.26879e-06	0.0956566	197	0.317797	0.210811	chr9:131397881	hg19_cpg_inter	2	WDR34	hg19_genes_intronexonboundaries	Enhancers	Enhancers	Flanking Active TSS	rs530517395		rs530517395	+	G	G	A/G	by-1000genomes	0.000399	0.014124	chr9:131397881	-	28.4975	10.2448
chr4:153882652	-0.863026	0.185261	0.177764	0.158643	6.35364e-06	0.0956566	181	0.499789	0.281313	chr4:153882652	hg19_cpg_inter	1	FHDC1	hg19_genes_introns	Enhancers	Enhancers	Quiescent/Low	rs775346370		rs775346370	+	G	G	A/G	by-cluster	0	0	chr4:153882652	-	30.884	12.8687
chr17:7757497	-2.58831	0.559344	0.140034	0.123959	6.41281e-06	0.0956566	223	0.694047	0.0888147	chr17:7757497	hg19_cpg_islands	4	TMEM88	hg19_genes_promoters	Weak transcription	Weak transcription	Weak transcription	none	rs1386283858(3bp)	none		NA	NA	No SNP				chr17:7757497	-	321.682	84.2022
chr16:2088957	-0.991406	0.213787	0.17613	0.158786	6.55219e-06	0.0956566	199	0.437512	0.22325	chr16:2088957	hg19_cpg_islands	10	SLC9A3R2	hg19_genes_exons	Enhancers	Enhancers	Enhancers	rs1479044414		rs1479044414	+	G	G	A/G	unknown	0	0	chr16:2088957	-	27.7538	10.692
chr3:32858345	12.8994	2.79048	0.149117	0.132909	6.61278e-06	0.0956566	220	0.00340472	0.0166942	chr3:32858345	hg19_cpg_islands	1	TRIM71	hg19_genes_1to5kb	Flanking Bivalent TSS/Enh	Active TSS	Bivalent/Poised TSS	rs968729445		rs968729445	+	C	C	C/G	unknown	0	0	chr3:32858345	+	42.7955	15.7079
chr12:6681058	-6.45534	1.39921	0.141229	0.125615	6.71988e-06	0.0956566	230	0.980511	0.0329812	chr12:6681058	hg19_cpg_shelves	9	CHD4	hg19_genes_introns	Strong transcription	Strong transcription	Strong transcription	none	rs1033749262(1bp)	none		NA	NA	No SNP				chr12:6681058	+	127.465	40.1773
chr8:130996034	-1.04121	0.224771	0.157821	0.13971	6.78087e-06	0.0956566	196	0.294161	0.215583	chr8:130996034	hg19_cpg_islands	3	FAM49B	hg19_genes_introns	Flanking Active TSS	Active TSS	Flanking Active TSS	none	rs772269602(1bp)	none		NA	NA	No SNP				chr8:130996034	-	28.7959	10.7546
chr9:36458725	1.10074	0.238661	0.147831	0.131752	6.8891e-06	0.0956566	222	0.67946	0.197748	chr9:36458725	hg19_cpg_inter	1		hg19_genes_intergenic	Weak transcription	Weak transcription	Weak transcription	rs1234434071		rs1234434071	+	G	G	A/G	unknown	0	0	chr9:36458725	-	43.6081	15.4543
chr19:7805354	2.9643	0.643338	0.141036	0.125419	6.89491e-06	0.0956566	230	0.815484	0.0735763	chr19:7805354	hg19_cpg_inter	24	CD209	hg19_genes_exons	Weak Repressed PolyComb	Weak Repressed PolyComb	Repressed PolyComb	rs1006246175		rs1006246175	+	C	C	C/T	unknown	0	0	chr19:7805354	+	245.778	72.6119
chr10:73527791	-1.01146	0.219336	0.157888	0.141046	7.12544e-06	0.0975711	210	0.265229	0.210979	chr10:73527791	hg19_cpg_inter	3	CDH23	hg19_genes_introns	Flanking Active TSS	Enhancers	Flanking Active TSS	rs1028126622		rs1028126622	+	G	G	A/G	unknown	0	0	chr10:73527791	-	31.7095	11.7545

## Sheet: table-S4
Supplementary Table-4: CpG sites associated with SI (Insulin sensitivity index from FSIGT)
No CpG site is significantly associated at FDR-P<0.05. Results for CpG sites associated with SI at FDR-P<0.1 in epigenome wide association study (EWAS) are shown.
Results are sorted by EWAS p-value.
EWAS							Methylation Level			ANNOTATR CpG siteAnnotation					ChromHMM_15state annotation			FALCAN annotation		UCSC allSNP151								RRBS seq-coverage
CpG_site	Beta	StdErr	R2_full	adj_R2_full	P-value	FDR_P	N	Mean	StDev	CpG_site	CpG_annottype	CountOfgene annoation	annotsymbol	gene_annottype	E063_adipose-nuclei	E023_Mesenchymal Stem Cell Derived Adipocyte Cultured Cells	E025_Adipose Derived Mesenchymal Stem Cell Cultured Cells	snpName	nearestReferenceSNP	name	strand	refNCBI	refUCSC	observed	valid	avHet	avHetSE	CpG site	CpG_strand	mean_cov (X)	sd_cov
chr7:1314462	-1.18092	0.212053	0.189328	0.170475	9.70357e-08	0.0614506	178	0.630012	0.238129	chr7:1314462	hg19_cpg_shores	1		hg19_genes_intergenic	Repressed PolyComb	Weak Repressed PolyComb	Weak Repressed PolyComb	rs1214287379		rs1214287379	+	C	C	A/C/T	unknown	0	0	chr7:1314462	+	26.1742	10.1407
chr17:7757500	-3.16005	0.584948	0.129382	0.113334	1.72447e-07	0.0614506	223	0.686202	0.0867957	chr17:7757500	hg19_cpg_islands	4	TMEM88	hg19_genes_promoters	Weak transcription	Weak transcription	Weak transcription	none	rs1313634607(2bp)	none		NA	NA	No SNP				chr17:7757500	-	321.014	83.7746
chr20:30458102	-17.7298	3.37287	0.132162	0.115311	3.65784e-07	0.0614506	212	0.00152928	0.0138337	chr20:30458102	hg19_cpg_islands	10	TTLL9	hg19_genes_promoters	Active TSS	Bivalent/Poised TSS	Bivalent/Poised TSS	rs1366337408		rs1366337408	+	G	G	G/T	unknown	0	0	chr20:30458102	-	34.9293	12.8808
chr13:40342448	-1.01909	0.19422	0.135644	0.118094	3.97602e-07	0.0614506	203	0.449284	0.25731	chr13:40342448	hg19_cpg_inter	1	COG6	hg19_genes_introns	Enhancers	Enhancers	Weak transcription	rs372236048		rs372236048	+	G	G	A/G	by-cluster	0	0	chr13:40342448	-	32.5566	14.5415
chr14:97093526	1.8475	0.354412	0.123347	0.107692	4.2192e-07	0.0614506	230	0.660106	0.131269	chr14:97093526	hg19_cpg_inter	1		hg19_genes_intergenic	Weak Repressed PolyComb	Repressed PolyComb	Repressed PolyComb	rs185570525		rs185570525	+	C	C	C/T	by-1000genomes	0.000399	0.014124	chr14:97093526	+	210.713	62.2817
chr14:72062339	-2.25682	0.435078	0.122412	0.106741	4.77362e-07	0.0614506	230	0.770176	0.104276	chr14:72062339	hg19_cpg_inter	5	SIPA1L1	hg19_genes_introns	Weak transcription	Enhancers	Enhancers	rs554171848		rs554171848	+	G	G	A/G	by-cluster	0	0	chr14:72062339	-	158.326	57.3961
chr17:7757497	-2.87695	0.554995	0.121123	0.104922	4.97006e-07	0.0614506	223	0.694047	0.0888147	chr17:7757497	hg19_cpg_islands	4	TMEM88	hg19_genes_promoters	Weak transcription	Weak transcription	Weak transcription	none	rs1386283858(3bp)	none		NA	NA	No SNP				chr17:7757497	-	321.682	84.2022
chr19:6271838	-1.04692	0.201517	0.142835	0.125519	5.06478e-07	0.0614506	204	0.329825	0.23106	chr19:6271838	hg19_cpg_shores	1	MLLT1	hg19_genes_introns	Flanking Active TSS	Flanking Active TSS	Flanking Active TSS	none	rs1429374346(1bp)	none		NA	NA	No SNP				chr19:6271838	-	33.2255	12.6584
chr11:60543393	-1.63552	0.316501	0.1217	0.106017	5.24386e-07	0.0614506	230	0.38269	0.144207	chr11:60543393	hg19_cpg_inter	7	MS4A15	hg19_genes_exons	Enhancers	Enhancers	Weak Repressed PolyComb	rs573518947		rs573518947	+	G	G	A/C/G	by-1000genomes	0.000399	0.014124	chr11:60543393	-	74.8478	23.4312
chr17:76333706	1.09562	0.212476	0.158028	0.137739	7.09459e-07	0.0701139	172	0.545222	0.250889	chr17:76333706	hg19_cpg_inter	1		hg19_genes_intergenic	Enhancers	Enhancers	Enhancers	rs556127459		rs556127459	+	G	G	A/G	by-1000genomes	0.000399	0.014124	chr17:76333706	-	24.6686	8.59352
chr11:95600522	1.18712	0.233292	0.122114	0.105931	7.80453e-07	0.0701139	223	0.701773	0.194862	chr11:95600522	hg19_cpg_inter	5	MTMR2	hg19_genes_introns	Weak transcription	Weak transcription	Weak transcription	rs374080984		rs374080984	+	G	G	A/G	by-cluster	0	0	chr11:95600522	-	45.9462	18.47
chr15:74425798	1.06577	0.210881	0.12226	0.10593	9.24508e-07	0.0701139	221	0.38569	0.219381	chr15:74425798	hg19_cpg_islands	5	ISLR2	hg19_genes_exons	Repressed PolyComb	Weak Repressed PolyComb	Repressed PolyComb	rs747591965		rs747591965	+	G	G	C/G/T	by-frequency	6.9e-05	0.005876	chr15:74425798	-	37.1946	13.8029
chr13:114898203	-17.571	3.49586	0.117336	0.100914	1.05189e-06	0.0701139	221	0.00201509	0.0134278	chr13:114898203	hg19_cpg_islands	6	RASA3	hg19_genes_promoters	Active TSS	Active TSS	Active TSS	none	rs953932369(4bp)	none		NA	NA	No SNP				chr13:114898203	+	40.1267	14.1634
chr12:58131782	-1.12307	0.223019	0.139598	0.121484	1.10168e-06	0.0701139	196	0.316763	0.221319	chr12:58131782	hg19_cpg_islands	3	AGAP2	hg19_genes_exons	Flanking Bivalent TSS/Enh	Weak Repressed PolyComb	Repressed PolyComb	none	rs1047483524(1bp)	none		NA	NA	No SNP				chr12:58131782	-	26.9898	9.7381
chr1:155291272	-1.37914	0.27701	0.114936	0.099131	1.2773e-06	0.0701139	230	0.243819	0.167187	chr1:155291272	hg19_cpg_shores	12	RUSC1-AS1	hg19_genes_exons	Flanking Active TSS	Active TSS	Active TSS	rs761686787		rs761686787	+	G	G	A/G/T	by-cluster	0	0	chr1:155291272	-	55.9	20.9135
chr9:74526039	-12.1668	2.43797	0.121587	0.10453	1.27878e-06	0.0701139	212	0.00277393	0.0191615	chr9:74526039	hg19_cpg_islands	10	C9orf85	hg19_genes_promoters	Active TSS	Active TSS	Active TSS	none	rs1373845666(1bp)	none		NA	NA	No SNP				chr9:74526039	+	32.1368	12.756
chr17:19880955	2.70621	0.543086	0.119896	0.103132	1.30655e-06	0.0701139	216	0.0544883	0.0871297	chr17:19880955	hg19_cpg_islands	7	AKAP10	hg19_genes_5UTRs	Active TSS	Active TSS	Active TSS	none	rs1160761542(1bp)	none		NA	NA	No SNP				chr17:19880955	+	32.4954	10.9064
chr6:138188305	-24.7402	4.97046	0.117448	0.100875	1.32789e-06	0.0701139	219	0.000878349	0.00918402	chr6:138188305	hg19_cpg_islands	6	TNFAIP3	hg19_genes_promoters	Active TSS	Active TSS	Active TSS	rs1189246640		rs1189246640	+	C	C	C/G	unknown	0	0	chr6:138188305	+	35.7899	12.8599
chr15:23158313	-5.17935	1.04074	0.122143	0.105734	1.32877e-06	0.0701139	220	0.0163666	0.0449008	chr15:23158313	hg19_cpg_islands	1		hg19_genes_intergenic	Active TSS	Weak Repressed PolyComb	Weak Repressed PolyComb	none	rs1290172091(4bp)	none		NA	NA	No SNP				chr15:23158313	-	36.8091	13.383
chr2:171672983	-5.96875	1.1954	0.13143	0.113335	1.32959e-06	0.0701139	198	0.0143206	0.0416044	chr2:171672983	hg19_cpg_islands	2	GAD1	hg19_genes_promoters	Flanking Bivalent TSS/Enh	Bivalent Enhancer	Flanking Bivalent TSS/Enh	none	rs1418976974(1bp)	none		NA	NA	No SNP				chr2:171672983	+	30.9697	13.777
chr1:164290576	-4.56423	0.919336	0.143632	0.124495	1.59591e-06	0.0703013	185	0.0181466	0.0543812	chr1:164290576	hg19_cpg_islands	1		hg19_genes_intergenic	Active TSS	Active TSS	Active TSS	rs1031491911		rs1031491911	+	C	C	C/G	unknown	0	0	chr1:164290576	+	26.7459	9.55051
chr16:25084915	-1.27577	0.258452	0.124401	0.107563	1.63132e-06	0.0703013	214	0.751373	0.183332	chr16:25084915	hg19_cpg_inter	1		hg19_genes_intergenic	Quiescent/Low	Quiescent/Low	Quiescent/Low	rs1324517000		rs1324517000	+	C	C	C/T	unknown	0	0	chr16:25084915	+	35.7383	13.5908
chr17:1552872	-114.232	23.1163	0.14169	0.121959	1.8105e-06	0.0703013	180	0.000230294	0.00218438	chr17:1552872	hg19_cpg_islands	6	RILP	hg19_genes_exons	Active TSS	Active TSS	Active TSS	rs1438278855		rs1438278855	+	G	G	A/G	unknown	0	0	chr17:1552872	-	25.8278	9.51202
chr17:3749360	-8.76784	1.78049	0.124873	0.106352	1.8394e-06	0.0703013	194	0.00340686	0.0279886	chr17:3749360	hg19_cpg_islands	2	NCBP3	hg19_genes_exons	Active TSS	Active TSS	Active TSS	none	rs1380561321(1bp)	none		NA	NA	No SNP				chr17:3749360	+	27.7835	9.95558
chr2:38303022	-3.94926	0.799355	0.15792	0.137751	1.8793e-06	0.0703013	173	0.014995	0.0627866	chr2:38303022	hg19_cpg_islands	2	CYP1B1	hg19_genes_5UTRs	Flanking Bivalent TSS/Enh	Active TSS	Active TSS	none	rs76923223(3bp)	none		NA	NA	No SNP				chr2:38303022	-	24.474	7.69519
chr19:38398186	-6.45699	1.31588	0.118278	0.10099	1.88872e-06	0.0703013	210	0.00444401	0.0342419	chr19:38398186	hg19_cpg_shores	3	WDR87	hg19_genes_promoters	Active TSS	Active TSS	Active TSS	none	rs974981961(1bp)	none		NA	NA	No SNP				chr19:38398186	-	32.0857	11.4446
chr4:54175157	2.40823	0.488769	0.165849	0.147208	1.89101e-06	0.0703013	185	0.954794	0.104418	chr4:54175157	hg19_cpg_inter	2	SCFD2	hg19_genes_introns	Weak transcription	Enhancers	Enhancers	rs188761465		rs188761465	+	G	G	A/G	by-1000genomes	0	0	chr4:54175157	-	26.4378	9.94756
chr18:58324043	1.10997	0.225865	0.135083	0.11668	1.93272e-06	0.0703013	194	0.606505	0.223161	chr18:58324043	hg19_cpg_inter	1		hg19_genes_intergenic	Quiescent/Low	Quiescent/Low	Quiescent/Low	rs912744701		rs912744701	+	G	G	A/G	unknown	0	0	chr18:58324043	-	38.3196	16.8526
chr4:141391113	-1.2023	0.245644	0.116717	0.100284	1.93305e-06	0.0703013	221	0.242794	0.187411	chr4:141391113	hg19_cpg_inter	1	MGAT4D	hg19_genes_introns	Flanking Bivalent TSS/Enh	Weak Repressed PolyComb	Repressed PolyComb	rs1337266705		rs1337266705	+	G	G	A/G/T	unknown	0	0	chr4:141391113	-	42.2081	19.698
chr1:21948847	-6.97228	1.41745	0.140916	0.121167	2.00513e-06	0.0704918	180	0.00655769	0.0350945	chr1:21948847	hg19_cpg_islands	6	RAP1GAP	hg19_genes_exons	Bivalent Enhancer	Weak Repressed PolyComb	Repressed PolyComb	none	rs1212083966(2bp)	none		NA	NA	No SNP				chr1:21948847	+	26.4111	9.57638
chr1:41922306	-1.11327	0.228168	0.121465	0.103806	2.17858e-06	0.0734152	205	0.743155	0.206512	chr1:41922306	hg19_cpg_inter	1		hg19_genes_intergenic	Quiescent/Low	Weak Repressed PolyComb	Enhancers	rs1273807788		rs1273807788	+	C	C	C/T	unknown	0	0	chr1:41922306	+	34.2585	13.0435
chr15:65067196	-6.34225	1.29635	0.139995	0.11976	2.29773e-06	0.0734152	176	0.0095943	0.0405549	chr15:65067196	hg19_cpg_islands	1	RBPMS2	hg19_genes_introns	Active TSS	Active TSS	Repressed PolyComb	none	rs1356971593(1bp)	none		NA	NA	No SNP				chr15:65067196	-	25.0171	9.62109
chr18:58324079	1.09462	0.224785	0.133297	0.114857	2.36379e-06	0.0734152	194	0.685209	0.22263	chr18:58324079	hg19_cpg_inter	1		hg19_genes_intergenic	Quiescent/Low	Quiescent/Low	Quiescent/Low	rs189614078		rs189614078	+	G	G	A/G	by-frequency,by-1000genomes	0.000798	0.019964	chr18:58324079	-	38.201	16.8023
chr8:132054009	-3.73292	0.764201	0.140158	0.120044	2.36672e-06	0.0734152	177	0.0229401	0.0711734	chr8:132054009	hg19_cpg_islands	2	ADCY8	hg19_genes_1to5kb	Flanking Bivalent TSS/Enh	Flanking Bivalent TSS/Enh	Bivalent/Poised TSS	rs948107503		rs948107503	+	C	C	C/G	unknown	0	0	chr8:132054009	+	25.4068	10.0704
chr12:58131784	-1.12382	0.231273	0.132509	0.114149	2.4675e-06	0.0743543	195	0.309843	0.21675	chr12:58131784	hg19_cpg_islands	3	AGAP2	hg19_genes_exons	Flanking Bivalent TSS/Enh	Weak Repressed PolyComb	Repressed PolyComb	rs752991698		rs752991698	+	G	G	A/G	unknown	0.000827	0.020315	chr12:58131784	-	27.0359	9.76865
chr6:161776827	1.23479	0.255688	0.119837	0.103537	2.5935e-06	0.0748416	222	0.773954	0.179248	chr6:161776827	hg19_cpg_inter	15	PRKN	hg19_genes_introns	Quiescent/Low	Quiescent/Low	Quiescent/Low	rs969572157		rs969572157	+	G	G	A/G	unknown	0	0	chr6:161776827	-	35.7613	13.9259
chr19:11456704	-4.81504	0.996124	0.11742	0.099769	2.66514e-06	0.0748416	206	0.0118531	0.0486199	chr19:11456704	hg19_cpg_shores	11	CCDC159	hg19_genes_promoters	Flanking Active TSS	Active TSS	Active TSS	none	rs573077462(1bp)	none		NA	NA	No SNP				chr19:11456704	+	31.8544	12.6575
chr15:80743334	-1.05931	0.219345	0.114325	0.096787	2.70094e-06	0.0748416	208	0.696155	0.215899	chr15:80743334	hg19_cpg_inter	8	ARNT2	hg19_genes_exons	Weak Repressed PolyComb	Weak Repressed PolyComb	Weak Repressed PolyComb	rs777511006		rs777511006	+	G	G	A/G	unknown	1.7e-05	0.00288	chr15:80743334	-	30.3365	11.5295
chr12:115627670	-1.22275	0.254195	0.109033	0.093123	2.76751e-06	0.0748416	230	0.647582	0.179775	chr12:115627670	hg19_cpg_inter	1		hg19_genes_intergenic	Quiescent/Low	Quiescent/Low	Enhancers	rs527948173		rs527948173	+	G	G	A/G	by-frequency,by-1000genomes	0.000798	0.019964	chr12:115627670	-	64.5609	24.8359
chr4:149366042	-5.70465	1.18044	0.13867	0.11974	2.85256e-06	0.0752128	188	0.00711182	0.0423391	chr4:149366042	hg19_cpg_islands	3	NR3C2	hg19_genes_1to5kb	Active TSS	Active TSS	Active TSS	none	rs1313139346(2bp)	none		NA	NA	No SNP				chr4:149366042	-	26.2234	8.50499
chr14:75530812	-7.74203	1.61484	0.113442	0.097024	3.03763e-06	0.0760748	222	0.00412655	0.0279308	chr14:75530812	hg19_cpg_inter	4	ACYP1	hg19_genes_promoters	Flanking Active TSS	Active TSS	Active TSS	rs1416206437		rs1416206437	+	G	G	A/G	unknown	0	0	chr14:75530812	-	38.3288	13.0639
chr2:242500435	-1.11524	0.231699	0.138133	0.119498	3.07412e-06	0.0760748	191	0.218065	0.213983	chr2:242500435	hg19_cpg_shores	2	BOK	hg19_genes_introns	Flanking Active TSS	Flanking Active TSS	Flanking Active TSS	rs1466612969		rs1466612969	+	G	G	A/G	unknown	0	0	chr2:242500435	-	27.5864	9.91976
chr11:73018899	-4.48228	0.934855	0.127762	0.110988	3.10164e-06	0.0760748	214	0.0176555	0.0485327	chr11:73018899	hg19_cpg_islands	1	ARHGEF17	hg19_genes_promoters	Flanking Active TSS	Active TSS	Active TSS	rs1366959619		rs1366959619	+	G	G	C/G	unknown	0	0	chr11:73018899	-	33.4439	12.4642
chr2:10361108	1.08753	0.227376	0.118804	0.101939	3.25859e-06	0.0772188	214	0.728372	0.204688	chr2:10361108	hg19_cpg_inter	1		hg19_genes_intergenic	Repressed PolyComb	Weak Repressed PolyComb	Weak transcription	rs1018367278		rs1018367278	+	C	C	C/T	unknown	0	0	chr2:10361108	+	33.6355	13.1001
chr6:28602939	-3.5715	0.748167	0.116319	0.100104	3.31578e-06	0.0772188	224	0.0184626	0.0613495	chr6:28602939	hg19_cpg_islands	0			Flanking Active TSS	Flanking Active TSS	Bivalent/Poised TSS	none	rs1017353756(1bp)	none		NA	NA	No SNP				chr6:28602939	-	38.3973	13.6746
chr12:6961388	-13.1349	2.75616	0.112996	0.096339	3.48299e-06	0.0772188	219	0.0027569	0.0171752	chr12:6961388	hg19_cpg_islands	4	CDCA3	hg19_genes_promoters	Flanking Active TSS	Active TSS	Active TSS	none	rs782767824(1bp)	none		NA	NA	No SNP				chr12:6961388	-	37.8584	15.5107
chr1:53393901	-1.26062	0.263983	0.117479	0.099093	3.55127e-06	0.0772188	198	0.181757	0.188414	chr1:53393901	hg19_cpg_shores	7	SCP2	hg19_genes_introns	Flanking Active TSS	Active TSS	Active TSS	rs914205099		rs914205099	+	G	G	C/G	unknown	0	0	chr1:53393901	-	32.697	12.6951
chr8:21900749	-1.36692	0.286923	0.122054	0.104839	3.59798e-06	0.0772188	210	0.166052	0.164215	chr8:21900749	hg19_cpg_inter	5	FGF17	hg19_genes_intronexonboundaries	Repressed PolyComb	Repressed PolyComb	Repressed PolyComb	rs3176271		rs3176271	+	C	C	C/T	by-cluster,by-frequency,by-1000genomes	0.018202	0.093646	chr8:21900749	+	30.6238	10.9905
chr17:18266628	-12.9341	2.70845	0.127066	0.108293	3.62334e-06	0.0772188	192	0.00201823	0.0181995	chr17:18266628	hg19_cpg_islands	5	SHMT1	hg19_genes_introns	Active TSS	Active TSS	Active TSS	none	rs1043856482(2bp)	none		NA	NA	No SNP				chr17:18266628	+	27.1615	10.0595
chr12:121563985	3.51722	0.740737	0.106891	0.090943	3.66079e-06	0.0772188	230	0.887832	0.0614049	chr12:121563985	hg19_cpg_inter	1		hg19_genes_intergenic	Quiescent/Low	Weak Repressed PolyComb	Weak Repressed PolyComb	rs557992330		rs557992330	+	C	C	C/T	by-1000genomes	0.000399	0.014124	chr12:121563985	+	177.326	76.8951
chr6:5701466	-1.46894	0.309973	0.10657	0.090616	3.81769e-06	0.0789493	230	0.565967	0.149847	chr6:5701466	hg19_cpg_inter	2	FARS2	hg19_genes_introns	Quiescent/Low	Quiescent/Low	Quiescent/Low	rs1159545137		rs1159545137	+	C	C	C/T	unknown	0	0	chr6:5701466	+	76.5565	22.7488
chr10:126826805	-1.07693	0.227879	0.11308	0.095775	4.25176e-06	0.0847461	211	0.583592	0.217237	chr10:126826805	hg19_cpg_inter	4	CTBP2	hg19_genes_introns	Enhancers	Weak transcription	Weak transcription	none	rs1319455715(1bp)	none		NA	NA	No SNP				chr10:126826805	-	31.0474	11.2507
chr1:53034075	-2.6181	0.55142	0.133372	0.113563	4.25871e-06	0.0847461	181	0.469198	0.0989877	chr1:53034075	hg19_cpg_inter	1		hg19_genes_intergenic	Quiescent/Low	Weak Repressed PolyComb	Weak Repressed PolyComb	rs943017428		rs943017428	+	G	G	A/C/G/T	unknown	0	0	chr1:53034075	-	387.575	83.6732
chr7:67478975	1.88018	0.397747	0.132217	0.113851	4.44041e-06	0.0852025	195	0.92652	0.122493	chr7:67478975	hg19_cpg_inter	1		hg19_genes_intergenic	Quiescent/Low	Quiescent/Low	Quiescent/Low	none	rs1180719133(1bp)	none		NA	NA	No SNP				chr7:67478975	-	30.4513	12.1117
chr12:58131816	-1.07543	0.227475	0.126845	0.108267	4.44321e-06	0.0852025	194	0.305418	0.21944	chr12:58131816	hg19_cpg_islands	3	AGAP2	hg19_genes_exons	Flanking Bivalent TSS/Enh	Weak Repressed PolyComb	Repressed PolyComb	none	rs1174914217(3bp)	none		NA	NA	No SNP				chr12:58131816	-	27.134	9.79757
chr16:27379016	2.05766	0.437958	0.105178	0.089199	4.57758e-06	0.0862115	230	0.130181	0.106782	chr16:27379016	hg19_cpg_inter	1		hg19_genes_intergenic	Flanking Bivalent TSS/Enh	Flanking Active TSS	Flanking Active TSS	rs1040335826		rs1040335826	+	C	C	A/C/T	unknown	0	0	chr16:27379016	+	91.5696	29.3222
chr12:58132409	-1.12704	0.240876	0.104517	0.088526	4.98945e-06	0.0923199	230	0.353015	0.190129	chr12:58132409	hg19_cpg_shores	3	AGAP2	hg19_genes_promoters	Weak Repressed PolyComb	Weak Repressed PolyComb	Repressed PolyComb	rs1425164875		rs1425164875	+	C	C	C/G	unknown	0	0	chr12:58132409	+	73.2	28.7647
chr16:79312518	1.748	0.373731	0.103799	0.087355	5.1005e-06	0.0927475	224	0.915678	0.125244	chr16:79312518	hg19_cpg_inter	1		hg19_genes_intergenic	Quiescent/Low	Weak Repressed PolyComb	Quiescent/Low	rs1045372299		rs1045372299	+	G	G	A/G	unknown	0	0	chr16:79312518	-	46.2098	19.5181
chr17:7757490	-3.89934	0.838343	0.101835	0.085279	5.73303e-06	0.0987951	223	0.886687	0.0578769	chr17:7757490	hg19_cpg_islands	4	TMEM88	hg19_genes_promoters	Weak transcription	Weak transcription	Weak transcription	rs1400460017		rs1400460017	+	G	G	A/G/T	unknown	0	0	chr17:7757490	-	321.57	84.2384
chr1:228400210	-1.00186	0.214208	0.121626	0.101433	5.81988e-06	0.0987951	180	0.348763	0.243727	chr1:228400210	hg19_cpg_islands	5	OBSCN	hg19_genes_exons	Bivalent Enhancer	Repressed PolyComb	Repressed PolyComb	none	rs199979779(1bp)	none		NA	NA	No SNP				chr1:228400210	+	25.4889	9.34592
chr6:15505349	-1.12761	0.24268	0.107072	0.090763	5.82639e-06	0.0987951	225	0.267403	0.195772	chr6:15505349	hg19_cpg_inter	3	JARID2	hg19_genes_introns	Flanking Active TSS	Active TSS	Flanking Active TSS	rs192742962		rs192742962	+	G	G	A/G	by-1000genomes	0	0	chr6:15505349	-	53.7022	20.1642
chr15:41788177	-1.09444	0.234773	0.111283	0.092768	5.85842e-06	0.0987951	198	0.330337	0.219959	chr15:41788177	hg19_cpg_islands	1	ITPKA	hg19_genes_introns	Flanking Bivalent TSS/Enh	Weak Repressed PolyComb	Repressed PolyComb	none	rs373418264(1bp)	none		NA	NA	No SNP				chr15:41788177	+	28.1515	11.0301
chr19:57149220	-1.64837	0.355345	0.103153	0.087137	5.9598e-06	0.0987951	230	0.58291	0.129354	chr19:57149220	hg19_cpg_shores	1		hg19_genes_intergenic	Heterochromatin	Quiescent/Low	Quiescent/Low	rs1010971076		rs1010971076	+	G	G	C/G	unknown	0	0	chr19:57149220	-	145.487	41.6471
chr17:76333716	1.01662	0.21735	0.136913	0.116116	5.99512e-06	0.0987951	172	0.575156	0.244779	chr17:76333716	hg19_cpg_inter	1		hg19_genes_intergenic	Enhancers	Enhancers	Enhancers	rs532643358		rs532643358	+	G	G	A/G	by-cluster,by-frequency,by-1000genomes	0.001197	0.024439	chr17:76333716	-	24.5814	8.65379
chr16:88603751	1.34592	0.288809	0.123807	0.104227	6.14845e-06	0.0997631	185	0.761851	0.173933	chr16:88603751	hg19_cpg_shelves	1		hg19_genes_intergenic	Weak Repressed PolyComb	Weak Repressed PolyComb	Weak Repressed PolyComb	none	rs1460383556(1bp)	none		NA	NA	No SNP				chr16:88603751	+	27.5351	11.209

## Sheet: table-S5
Supplementary Table-5: CpG sites associated with BMI (Body Mass Index)
A total of 15 CpG sites are significantly associated at FDR-P<0.05. Results for CpG sites associated with BMI at FDR-P<0.1 in epigenome wide association study (EWAS) are shown.
Results are sorted by EWAS p-value.
EWAS							Methylation Level			ANNOTATR CpG site annotation					ChromHMM_15state annotation			FALCAN annotation		UCSC allSNP151								RRBS seq-coverage
CpG_site	Beta	StdErr	R2_full	adj_R2_full	P-value	FDR_P	N	Mean	StDev	CpG_site	CpG_annottype	CountOfgene annotation	annotsymbol	gene_annottype	E063_adipose-nuclei	E023_Mesenchymal Stem Cell Derived Adipocyte Cultured Cells	E025_Adipose Derived Mesenchymal Stem Cell Cultured Cells	snpName	nearestReferenceSNP	name	strand	refNCBI	refUCSC	observed	valid	avHet	avHetSE	CpG site	CpG_strand	mean_cov (X)	sd_cov
chr11:63974831	-0.832712	0.140789	0.214952	0.199782	1.35858e-08	0.0143292	212	0.381856	0.23621	chr11:63974831	hg19_cpg_islands	6	FERMT3	hg19_genes_5UTRs	Active TSS	Flanking Active TSS	Flanking Active TSS	rs1412649492		rs1412649492	+	G	G	A/G	unknown	0	0	chr11:63974831	-	36.5236	14.2248
chr13:113926948	-2.08777	0.368722	0.190944	0.17656	4.53426e-08	0.0238605	230	0.76238	0.0854501	chr13:113926948	hg19_cpg_inter	1		hg19_genes_intergenic	Weak transcription	Enhancers	Genic enhancers	rs553867087		rs553867087	+	G	G	A/G	by-1000genomes	0.000399	0.014124	chr13:113926948	-	242.183	66.0308
chr17:76333706	-0.796132	0.142568	0.238965	0.220736	9.34082e-08	0.0238605	172	0.545222	0.250889	chr17:76333706	hg19_cpg_inter	1		hg19_genes_intergenic	Enhancers	Enhancers	Enhancers	rs556127459		rs556127459	+	G	G	A/G	by-1000genomes	0.000399	0.014124	chr17:76333706	-	24.6686	8.59352
chr9:130281888	-0.884027	0.163439	0.175327	0.159693	1.71194e-07	0.0238605	216	0.262016	0.196461	chr9:130281888	hg19_cpg_inter	3	FAM129B	hg19_genes_introns	Enhancers	Enhancers	Enhancers	rs1390710535		rs1390710535	+	G	G	A/G	unknown	0	0	chr9:130281888	-	29.8843	11.6663
chr5:55380949	0.925416	0.171674	0.181797	0.167186	1.77712e-07	0.0238605	229	0.276619	0.181587	chr5:55380949	hg19_cpg_inter	1		hg19_genes_intergenic	Flanking Active TSS	Enhancers	Enhancers	none	rs1043159916(1bp)	none		NA	NA	No SNP				chr5:55380949	-	61.3712	23.5101
chr5:60630630	1.05893	0.196749	0.181091	0.166532	1.84534e-07	0.0238605	230	0.351214	0.16444	chr5:60630630	hg19_cpg_shores	1	ZSWIM6	hg19_genes_introns	Flanking Active TSS	Flanking Active TSS	Active TSS	rs1191417839		rs1191417839	+	G	G	A/G	unknown	0	0	chr5:60630630	-	114.009	45.8981
chr8:125774328	-0.815273	0.151537	0.189458	0.173795	2.00627e-07	0.0238605	212	0.337502	0.211162	chr8:125774328	hg19_cpg_inter	1		hg19_genes_intergenic	Quiescent/Low	Enhancers	Enhancers	rs902542288		rs902542288	+	G	G	A/G	unknown	0	0	chr8:125774328	-	40.434	16.0936
chr2:147146589	-0.992063	0.185107	0.178832	0.164169	2.07103e-07	0.0238605	229	0.400254	0.172999	chr2:147146589	hg19_cpg_inter	1		hg19_genes_intergenic	Quiescent/Low	Quiescent/Low	Quiescent/Low	none	rs188498353(1bp)	none		NA	NA	No SNP				chr2:147146589	-	94.6725	35.0637
chr5:137990473	-1.43862	0.269311	0.179697	0.165113	2.24842e-07	0.0238605	230	0.371342	0.118918	chr5:137990473	hg19_cpg_inter	1		hg19_genes_intergenic	Weak Repressed PolyComb	Weak Repressed PolyComb	Enhancers	rs1438809474		rs1438809474	+	C	C	C/T	unknown	0	0	chr5:137990473	+	278.996	87.7438
chr19:1215266	0.77523	0.14503	0.181898	0.165617	2.43874e-07	0.0238605	206	0.41352	0.233432	chr19:1215266	hg19_cpg_inter	1	STK11	hg19_genes_introns	Enhancers	Enhancers	Enhancers	rs1007716654		rs1007716654	+	G	G	A/G	unknown	0	0	chr19:1215266	-	28.7815	10.9047
chr10:3138667	-0.902325	0.169877	0.184031	0.169127	2.66479e-07	0.0238605	224	0.693743	0.185719	chr10:3138667	hg19_cpg_inter	3	PFKP	hg19_genes_introns	Flanking Active TSS	Enhancers	Enhancers	rs1212952355		rs1212952355	+	G	G	A/C/G	unknown	0	0	chr10:3138667	-	36.0045	12.6493
chr17:7757490	2.99044	0.564347	0.170167	0.154941	2.84496e-07	0.0238605	223	0.886687	0.0578769	chr17:7757490	hg19_cpg_islands	4	TMEM88	hg19_genes_promoters	Weak transcription	Weak transcription	Weak transcription	rs1400460017		rs1400460017	+	G	G	A/G/T	unknown	0	0	chr17:7757490	-	321.57	84.2384
chr1:155291256	0.897156	0.170059	0.177412	0.162788	3.1063e-07	0.0238605	230	0.303957	0.185891	chr1:155291256	hg19_cpg_shores	12	RUSC1-AS1	hg19_genes_exons	Flanking Active TSS	Active TSS	Active TSS	rs773040464		rs773040464	+	G	G	A/C/G	by-frequency	6.3e-05	0.005628	chr1:155291256	-	56.0957	20.9437
chr12:116963375	1.56483	0.296845	0.177275	0.162649	3.16717e-07	0.0238605	230	0.216982	0.106301	chr12:116963375	hg19_cpg_inter	1		hg19_genes_intergenic	Weak Repressed PolyComb	Enhancers	Active TSS	rs1024486119		rs1024486119	+	G	G	A/G	unknown	0	0	chr12:116963375	-	202.122	56.5314
chr17:7757500	2.0951	0.40161	0.167242	0.151962	4.22905e-07	0.0297364	223	0.686202	0.0867957	chr17:7757500	hg19_cpg_islands	4	TMEM88	hg19_genes_promoters	Weak transcription	Weak transcription	Weak transcription	none	rs1313634607(2bp)	none		NA	NA	No SNP				chr17:7757500	-	321.014	83.7746
chr6:1389868	2.49427	0.487171	0.221455	0.20396	7.88326e-07	0.0505696	183	0.023312	0.0696894	chr6:1389868	hg19_cpg_islands	1	FOXF2	hg19_genes_promoters	Active TSS	Active TSS	Active TSS	none	rs1278169204(3bp)	none		NA	NA	No SNP				chr6:1389868	-	25.4863	8.54906
chr1:89932065	-0.63145	0.124515	0.16933	0.153042	8.85362e-07	0.0505696	209	0.527379	0.265821	chr1:89932065	hg19_cpg_inter	1		hg19_genes_intergenic	Quiescent/Low	Quiescent/Low	Quiescent/Low	rs985097858		rs985097858	+	C	C	C/T	unknown	0	0	chr1:89932065	+	40.0239	17.9868
chr1:8612852	1.2281	0.242597	0.17875	0.163471	8.88724e-07	0.0505696	220	0.84866	0.135553	chr1:8612852	hg19_cpg_inter	3	RERE	hg19_genes_introns	Weak transcription	Weak transcription	Weak transcription	rs947669548		rs947669548	+	G	G	A/G	unknown	0	0	chr1:8612852	-	46.8727	19.5451
chr17:7915945	0.92782	0.183771	0.174996	0.160064	9.28855e-07	0.0505696	226	0.765135	0.17053	chr17:7915945	hg19_cpg_shelves	2	GUCY2D	hg19_genes_intronexonboundaries	Weak Repressed PolyComb	Repressed PolyComb	Repressed PolyComb	rs184164679		rs184164679	+	C	C	A/C/T	by-cluster,by-frequency,by-1000genomes	0.000288	0.01199	chr17:7915945	+	42.0531	14.9392
chr1:155291272	0.957355	0.189974	0.16941	0.154644	9.5892e-07	0.0505696	230	0.243819	0.167187	chr1:155291272	hg19_cpg_shores	12	RUSC1-AS1	hg19_genes_exons	Flanking Active TSS	Active TSS	Active TSS	rs761686787		rs761686787	+	G	G	A/G/T	by-cluster	0	0	chr1:155291272	-	55.9	20.9135
chr5:138189089	1.41445	0.282473	0.168341	0.153556	1.11399e-06	0.05595	230	0.638804	0.117076	chr5:138189089	hg19_cpg_inter	5	CTNNA1	hg19_genes_introns	Weak transcription	Weak transcription	Weak transcription	rs1221086286		rs1221086286	+	G	G	A/G	unknown	0	0	chr5:138189089	-	179.17	57.4738
chr19:3403712	1.02185	0.2045	0.16799	0.153199	1.17019e-06	0.0561012	230	0.258551	0.155197	chr19:3403712	hg19_cpg_inter	5	NFIC	hg19_genes_introns	Flanking Active TSS	Active TSS	Weak transcription	rs1357153280		rs1357153280	+	G	G	A/G	unknown	0	0	chr19:3403712	-	55.387	18.6782
chr17:7757497	1.90219	0.381066	0.159368	0.143944	1.22339e-06	0.0561016	223	0.694047	0.0888147	chr17:7757497	hg19_cpg_islands	4	TMEM88	hg19_genes_promoters	Weak transcription	Weak transcription	Weak transcription	none	rs1386283858(3bp)	none		NA	NA	No SNP				chr17:7757497	-	321.682	84.2022
chr8:130996067	0.748257	0.150021	0.181823	0.164688	1.36846e-06	0.0587914	196	0.366701	0.223253	chr8:130996067	hg19_cpg_islands	3	FAM49B	hg19_genes_introns	Flanking Active TSS	Active TSS	Flanking Active TSS	none	rs1276351285(1bp)	none		NA	NA	No SNP				chr8:130996067	-	28.8112	10.7541
chr14:97093542	-1.62425	0.327565	0.16672	0.151906	1.3983e-06	0.0587914	230	0.35618	0.0985378	chr14:97093542	hg19_cpg_inter	1		hg19_genes_intergenic	Weak Repressed PolyComb	Repressed PolyComb	Repressed PolyComb	rs550409999		rs550409999	+	C	C	C/T	by-1000genomes	0.000399	0.014124	chr14:97093542	+	210.77	62.3056
chr14:104348314	0.837611	0.169102	0.174181	0.159234	1.44927e-06	0.0587914	226	0.445703	0.188104	chr14:104348314	hg19_cpg_inter	1		hg19_genes_intergenic	Enhancers	Weak Repressed PolyComb	Repressed PolyComb	rs987073852		rs987073852	+	C	C	C/G/T	unknown	0	0	chr14:104348314	+	43.5221	15.2395
chr15:51148882	1.30728	0.264992	0.165885	0.151056	1.5718e-06	0.0601314	230	0.533364	0.119377	chr15:51148882	hg19_cpg_inter	0			Quiescent/Low	Quiescent/Low	Quiescent/Low	rs1013102297		rs1013102297	+	G	G	A/G	unknown	0	0	chr15:51148882	-	169.174	53.2655
chr22:23487962	0.890068	0.18013	0.167409	0.151243	1.60444e-06	0.0601314	211	0.283846	0.188732	chr22:23487962	hg19_cpg_islands	4	RAB36	hg19_genes_introns	Flanking Active TSS	Active TSS	Active TSS	none	rs1470374471(6bp)	none		NA	NA	No SNP				chr22:23487962	+	33.6777	13.3663
chr1:35612147	0.877063	0.176855	0.157513	0.137689	1.70389e-06	0.0601314	175	0.627245	0.204661	chr1:35612147	hg19_cpg_inter	1		hg19_genes_intergenic	Quiescent/Low	Weak Repressed PolyComb	Quiescent/Low	rs549287954		rs549287954	+	C	C	C/T	by-1000genomes	0.000399	0.014124	chr1:35612147	+	36.1314	17.2384
chr17:76333716	-0.728215	0.146771	0.212886	0.194033	1.71035e-06	0.0601314	172	0.575156	0.244779	chr17:76333716	hg19_cpg_inter	1		hg19_genes_intergenic	Enhancers	Enhancers	Enhancers	rs532643358		rs532643358	+	G	G	A/G	by-cluster,by-frequency,by-1000genomes	0.001197	0.024439	chr17:76333716	-	24.5814	8.65379
chr14:104651762	1.21591	0.247898	0.164948	0.150103	1.7919e-06	0.0609662	230	0.275729	0.128199	chr14:104651762	hg19_cpg_inter	1		hg19_genes_intergenic	Bivalent Enhancer	Weak Repressed PolyComb	Weak Repressed PolyComb	rs527776593		rs527776593	+	C	C	C/T	by-frequency,by-1000genomes	0.000798	0.019964	chr14:104651762	+	110.104	44.039
chr21:36577157	-1.57636	0.326908	0.157557	0.142378	2.63746e-06	0.0826658	227	0.349963	0.0980188	chr21:36577157	hg19_cpg_inter	1	RUNX1	hg19_genes_introns	Enhancers	Flanking Active TSS	Flanking Active TSS	rs749367954		rs749367954	+	C	C	C/G/T	unknown	0	0	chr21:36577157	+	288.507	88.9867
chr3:172374480	1.03384	0.214009	0.1762	0.160126	2.65919e-06	0.0826658	210	0.854165	0.154113	chr3:172374480	hg19_cpg_inter	4	NCEH1	hg19_genes_introns	Quiescent/Low	Quiescent/Low	Weak transcription	rs562554333		rs562554333	+	C	C	C/T	by-1000genomes	0.000399	0.014124	chr3:172374480	+	34.3905	13.885
chr19:48221862	0.641987	0.132293	0.167467	0.147762	2.75167e-06	0.0826658	174	0.353108	0.2649	chr19:48221862	hg19_cpg_shores	4	EHD2	hg19_genes_exons	Enhancers	Enhancers	Flanking Active TSS	rs368179494		rs368179494	+	C	C	A/C/T	by-cluster	0	0	chr19:48221862	+	25.5517	9.26209
chr13:113926945	-1.73607	0.361303	0.161685	0.146781	2.82702e-06	0.0826658	230	0.782561	0.0874594	chr13:113926945	hg19_cpg_inter	1		hg19_genes_intergenic	Weak transcription	Enhancers	Genic enhancers	rs1458744462		rs1458744462	+	G	G	A/G/T	unknown	0	0	chr13:113926945	-	242.839	66.3292
chr11:119514512	0.963961	0.200498	0.172534	0.156995	2.88148e-06	0.0826658	218	0.795836	0.163015	chr11:119514512	hg19_cpg_inter	1	NECTIN1	hg19_genes_introns	Weak Repressed PolyComb	Weak Repressed PolyComb	Weak Repressed PolyComb	rs546269781		rs546269781	+	C	C	C/T	by-1000genomes	0.000399	0.014124	chr11:119514512	+	35.211	13.5847
chr1:155291235	0.818313	0.170503	0.161502	0.146596	2.89995e-06	0.0826658	230	0.311484	0.186202	chr1:155291235	hg19_cpg_shores	12	RUSC1-AS1	hg19_genes_exons	Flanking Active TSS	Active TSS	Active TSS	rs1253705789		rs1253705789	+	G	G	A/G/T	unknown	0	0	chr1:155291235	-	56.1	20.9531
chr18:22915823	1.63063	0.340929	0.161189	0.14621	3.13226e-06	0.0869384	229	0.814573	0.0938026	chr18:22915823	hg19_cpg_inter	4	ZNF521	hg19_genes_introns	Weak transcription	Quiescent/Low	Quiescent/Low	rs568128079		rs568128079	+	C	C	C/T	by-frequency,by-1000genomes	0.000798	0.019964	chr18:22915823	+	219.673	70.9718
chr5:112601519	1.00847	0.211338	0.163334	0.148122	3.32609e-06	0.0899202	225	0.759394	0.15292	chr5:112601519	hg19_cpg_inter	5	MCC	hg19_genes_introns	Weak transcription	Quiescent/Low	Quiescent/Low	rs1413398317		rs1413398317	+	G	G	A/G	unknown	0	0	chr5:112601519	-	49.1822	18.6521
chr2:134865985	-1.03876	0.218067	0.16034	0.145413	3.4102e-06	0.0899202	230	0.634627	0.145014	chr2:134865985	hg19_cpg_inter	1		hg19_genes_intergenic	Quiescent/Low	Quiescent/Low	Quiescent/Low	rs757072595		rs757072595	+	C	C	C/T	unknown	0	0	chr2:134865985	+	75.9304	22.8514
chr19:7805350	-1.88813	0.398401	0.159559	0.144618	3.80241e-06	0.0931772	230	0.833815	0.0798731	chr19:7805350	hg19_cpg_inter	24	CD209	hg19_genes_exons	Weak Repressed PolyComb	Weak Repressed PolyComb	Repressed PolyComb	rs11465419		rs11465419	-	C	C	A/G	by-cluster,by-frequency,by-1000genomes	0.001596	0.028205	chr19:7805350	+	245.752	72.5669
chr19:48221860	0.657757	0.137646	0.164368	0.144589	3.81384e-06	0.0931772	174	0.368409	0.255113	chr19:48221860	hg19_cpg_shores	4	EHD2	hg19_genes_exons	Enhancers	Enhancers	Flanking Active TSS	rs779700524		rs779700524	+	C	C	C/T	unknown	7.5e-05	0.006135	chr19:48221860	+	25.523	9.26969
chr17:13504942	2.93519	0.617117	0.178232	0.161112	3.86493e-06	0.0931772	197	0.015239	0.0542103	chr17:13504942	hg19_cpg_islands	2	HS3ST3A1	hg19_genes_5UTRs	Flanking Bivalent TSS/Enh	Active TSS	Active TSS	none	rs1268994353(3bp)	none		NA	NA	No SNP				chr17:13504942	-	28.4061	10.299
chr9:124620053	1.11172	0.234395	0.188056	0.17259	3.8871e-06	0.0931772	215	0.854501	0.135914	chr9:124620053	hg19_cpg_inter	2	TTLL11	hg19_genes_introns	Weak transcription	Quiescent/Low	Weak Repressed PolyComb	rs913253024		rs913253024	+	C	C	C/T	unknown	0	0	chr9:124620053	+	35.9674	13.5275
chr11:63974842	-0.726295	0.153332	0.172025	0.156025	4.02849e-06	0.0944204	212	0.346758	0.2198	chr11:63974842	hg19_cpg_islands	4	FERMT3	hg19_genes_exons	Active TSS	Flanking Active TSS	Flanking Active TSS	rs767213325		rs767213325	+	G	G	A/G	by-frequency	5e-05	0.004984	chr11:63974842	-	36.5566	14.2307

## Sheet: table-S6
Supplementary Table-6: CpG regions associated with Matsuda insulin sensitivity index (from OGTT)
Results for CpG regions (tilling window of 1000bp region) associated with Matsuda index at FDR-P<0.05 in epigenome wide association study (EWAS) are shown.
Results are sorted by EWAS p-value.
EWAS	age, gender, admixture adjusted						Methylation Level			age, gender, admixture and cell type adjusted					ANNOTATR CpG region annotation
CpG_region	Beta	StdErr	R2_full	adj_R2_full	P-value	FDR_P	N	Mean	StDev	Beta	StdErr	R2_full	adj_R2_full	P-value	CountOfCpGannot	annottype_CpG	CountOf gene annot	annotsymbol_gene	annottype_gene
chr8:125774001-125775000	1.3303	0.217246	0.211459	0.195844	4.69688e-09	0.000943135	212	0.337502	0.211162	1.00493	0.197433	0.383362	0.368023	8.20614e-07	1	hg19_cpg_inter	1		hg19_genes_intergenic
chr16:11503001-11504000	-2.28704	0.396419	0.183796	0.16875	2.72327e-08	0.00240745	227	0.438627	0.115027	-1.81338	0.361104	0.347301	0.332193	1.07064e-06	1	hg19_cpg_inter	1		hg19_genes_intergenic
chr19:45261001-45262000	-2.15171	0.376695	0.179788	0.164875	3.59679e-08	0.00240745	230	0.39281	0.12305	-1.6224	0.348228	0.33404	0.318836	5.51332e-06	2	hg19_cpg_islands	7	BCL3	hg19_genes_exons
chr17:7757001-7758000	-5.25294	0.970077	0.168912	0.153801	1.60049e-07	0.00797243	230	0.773117	0.0522397	-3.4458	0.92457	0.311689	0.295974	0.00024675	2	hg19_cpg_islands	9	TMEM88	hg19_genes_promoters
chr17:62785001-62786000	-2.2783	0.424173	0.167334	0.152194	1.98517e-07	0.00797243	230	0.635356	0.108812	-1.75182	0.388015	0.330361	0.315072	1.035e-05	1	hg19_cpg_inter	2	PLEKHM1P1	hg19_genes_introns
chr3:16596001-16597000	-1.37411	0.258058	0.16847	0.153212	2.50897e-07	0.00839668	228	0.411487	0.178084	-0.973049	0.241016	0.319506	0.303826	7.499e-05	1	hg19_cpg_inter	1		hg19_genes_intergenic
chr3:67945001-67946000	-7.56637	1.43021	0.164442	0.149251	2.94319e-07	0.00844275	230	0.947501	0.0314984	-6.18981	1.28906	0.337757	0.322637	2.91324e-06	1	hg19_cpg_inter	1		hg19_genes_introns
chr7:33814001-33815000	1.32845	0.259021	0.168108	0.151796	6.7644e-07	0.0162192	213	0.826047	0.185569	0.915142	0.242281	0.321611	0.304902	0.00020833	1	hg19_cpg_inter	1		hg19_genes_intergenic
chr1:241715001-241716000	2.24116	0.440454	0.157315	0.141993	7.73779e-07	0.0162192	230	0.720128	0.10548	1.45287	0.416605	0.306543	0.290711	0.00058933	1	hg19_cpg_inter	3	KMO	hg19_genes_introns
chr19:773001-774000	-1.04158	0.202963	0.216072	0.196835	8.07839e-07	0.0162192	172	0.606562	0.25405	-0.897206	0.183606	0.372191	0.352815	2.44809e-06	1	hg19_cpg_inter	1		hg19_genes_intergenic
chr22:37799001-37800000	-2.34786	0.464106	0.156591	0.141187	8.91447e-07	0.0162192	229	0.288849	0.10015	-1.8119	0.422301	0.325403	0.30993	2.68e-05	1	hg19_cpg_inter	1	ELFN2	hg19_genes_introns
chr12:58132001-58133000	-2.05116	0.406947	0.155648	0.140296	9.69273e-07	0.0162192	230	0.308173	0.114124	-1.59431	0.369762	0.325307	0.309903	2.45e-05	4	hg19_cpg_islands	7	AGAP2	hg19_genes_promoters
chr20:54951001-54952000	2.10292	0.420985	0.154087	0.138707	1.19649e-06	0.016285	230	0.735155	0.109701	1.31852	0.399951	0.302641	0.286719	0.00114128	1	hg19_cpg_inter	8	AURKA	hg19_genes_introns
chr4:81128001-81129000	-1.77009	0.355154	0.156422	0.141015	1.2644e-06	0.016285	229	0.267847	0.134805	-1.17164	0.333157	0.310153	0.294331	0.00053138	3	hg19_cpg_islands	1		hg19_genes_intergenic
chr19:42654001-42655000	-2.49035	0.500465	0.153427	0.138034	1.30792e-06	0.016285	230	0.27204	0.0941341	-1.75083	0.463704	0.31277	0.29708	0.0002055	1	hg19_cpg_inter	1		hg19_genes_1to5kb
chr10:135202001-135203000	1.47943	0.297661	0.153224	0.137828	1.34413e-06	0.016285	230	0.679798	0.154197	1.04606	0.275435	0.313262	0.297583	0.00018905	1	hg19_cpg_shores	39	PAOX	hg19_genes_exons
chr14:103470001-103471000	-1.04834	0.209956	0.157257	0.138837	1.37871e-06	0.016285	193	0.577973	0.228773	-0.827166	0.187679	0.347782	0.329864	1.785e-05	1	hg19_cpg_inter	4	CDC42BPB	hg19_genes_exons
chr21:45292001-45293000	2.92707	0.595303	0.151398	0.135969	1.71876e-06	0.0191737	230	0.855306	0.0770215	2.09012	0.549157	0.313446	0.297771	0.00018327	1	hg19_cpg_inter	1	AGPAT3	hg19_genes_introns
chr9:101761001-101762000	-2.08463	0.4265	0.150403	0.134955	1.96511e-06	0.0201217	230	0.262233	0.111431	-1.50905	0.392156	0.314391	0.298738	0.00015618	1	hg19_cpg_inter	1	COL15A1	hg19_genes_introns
chr22:46454001-46455000	-1.50365	0.307869	0.145928	0.130328	2.00416e-06	0.0201217	229	0.302981	0.147847	-1.00609	0.28672	0.306585	0.290681	0.00054637	1	hg19_cpg_shelves	6		hg19_genes_promoters
chr7:157512001-157513000	-4.73126	0.976237	0.148999	0.133526	2.37314e-06	0.0206357	230	0.89005	0.0476757	-3.19273	0.90939	0.307035	0.291214	0.00054225	1	hg19_cpg_inter	5	PTPRN2	hg19_genes_introns
chr8:8647001-8648000	2.87506	0.593724	0.148863	0.133388	2.41688e-06	0.0206357	230	0.828451	0.0792527	1.77098	0.563237	0.29965	0.28366	0.00189567	1	hg19_cpg_inter	1	MFHAS1	hg19_genes_introns
chr6:170586001-170587000	-1.56466	0.323341	0.148749	0.133272	2.45401e-06	0.0206357	230	0.314224	0.144589	-1.05361	0.301273	0.306748	0.290921	0.00056924	2	hg19_cpg_shores	1		hg19_genes_intergenic
chr18:77941001-77942000	-1.51993	0.313087	0.166437	0.149338	2.46642e-06	0.0206357	205	0.439242	0.160373	-1.12536	0.29431	0.30212	0.284133	0.00017707	1	hg19_cpg_inter	4	PARD6G	hg19_genes_exons
chr15:32872001-32873000	1.88946	0.390949	0.164795	0.148174	2.66583e-06	0.0212171	211	0.784954	0.123081	1.4516	0.356272	0.330847	0.314118	6.649e-05	1	hg19_cpg_inter	3	LINC02256	hg19_genes_exons
chr4:1047001-1048000	-2.1274	0.442081	0.147843	0.13235	2.77141e-06	0.0212171	230	0.506851	0.104779	-1.39259	0.413931	0.304004	0.288114	0.00090584	2	hg19_cpg_shores	1		hg19_genes_intergenic
chr13:113926001-113927000	2.81669	0.586097	0.147628	0.13213	2.8529e-06	0.0212171	230	0.773361	0.0791483	1.30987	0.586524	0.284332	0.267992	0.0265417	1	hg19_cpg_inter	1		hg19_genes_intergenic
chr5:625001-626000	-1.73697	0.363597	0.147292	0.131574	3.27224e-06	0.0225822	227	0.706486	0.125711	-1.4693	0.324169	0.332972	0.317532	9.64953e-06	2	hg19_cpg_shores	2	CEP72	hg19_genes_introns
chr17:79000001-79001000	-1.69693	0.355748	0.146424	0.130904	3.35284e-06	0.0225822	230	0.421306	0.12899	-1.27855	0.32403	0.316616	0.301013	0.00010714	1	hg19_cpg_inter	1		hg19_genes_intergenic
chr5:158488001-158489000	-1.65058	0.346131	0.146377	0.130857	3.37383e-06	0.0225822	230	0.303385	0.131104	-1.18045	0.318305	0.311285	0.29556	0.00026421	1	hg19_cpg_inter	4	EBF1	hg19_genes_introns
chr19:7805001-7806000	3.73353	0.785012	0.145954	0.130425	3.571e-06	0.0231309	230	0.809671	0.0604267	1.86333	0.773063	0.286949	0.270669	0.0167641	1	hg19_cpg_inter	24	CD209	hg19_genes_exons
chr18:29232001-29233000	1.32446	0.279164	0.151511	0.135725	3.81061e-06	0.0237129	225	0.655684	0.170004	1.00458	0.256078	0.311639	0.295556	0.00011785	1	hg19_cpg_inter	3	B4GALT6	hg19_genes_introns
chr19:49841001-49842000	-1.15437	0.244009	0.145537	0.129931	4.00723e-06	0.0237129	229	0.449961	0.194879	-0.816716	0.224368	0.311786	0.296001	0.00034042	3	hg19_cpg_islands	36	CD37	hg19_genes_exons
chr1:35150001-35151000	2.79395	0.590837	0.145044	0.1295	4.03367e-06	0.0237129	230	0.121851	0.0776956	2.01747	0.541987	0.311588	0.295871	0.00025097	1	hg19_cpg_inter	1		hg19_genes_intergenic
chr5:140871001-140872000	2.37222	0.502419	0.144804	0.129255	4.16566e-06	0.0237129	230	0.535242	0.0924316	1.75873	0.458634	0.314089	0.298429	0.00016437	2	hg19_cpg_islands	26	PCDHGC5	hg19_genes_exons
chr3:194845001-194846000	-2.1584	0.458166	0.144964	0.129346	4.37893e-06	0.0237129	229	0.544464	0.104151	-1.52943	0.421576	0.310121	0.294298	0.00035594	1	hg19_cpg_inter	3	XXYLT1	hg19_genes_introns
chr17:40839001-40840000	-5.68663	1.20863	0.144251	0.128692	4.48558e-06	0.0237129	230	0.831236	0.0400265	-3.65515	1.13227	0.301281	0.285329	0.0014371	3	hg19_cpg_islands	12	CNTNAP1	hg19_genes_exons
chr1:8410001-8411000	-1.53365	0.32593	0.14698	0.1314	4.4875e-06	0.0237129	229	0.253176	0.144938	-1.19046	0.294878	0.321726	0.306169	7.493e-05	1	hg19_cpg_inter	1		hg19_genes_intergenic
chr17:80262001-80263000	-2.31669	0.493087	0.14403	0.128467	4.62049e-06	0.0237896	230	0.321869	0.0963819	-1.61423	0.455009	0.307814	0.29201	0.00047534	1	hg19_cpg_inter	1		hg19_genes_intergenic
chr7:45068001-45069000	1.88204	0.402139	0.143424	0.12785	5.01074e-06	0.0251539	230	0.692154	0.119258	1.38972	0.367124	0.312985	0.2973	0.00019814	1	hg19_cpg_inter	7	CCM2	hg19_genes_introns
chr21:44819001-44820000	1.96986	0.42156	0.143182	0.127604	5.17552e-06	0.0253474	230	0.624769	0.111596	1.41812	0.386538	0.310415	0.294671	0.00030608	2	hg19_cpg_islands	1		hg19_genes_intergenic
chr15:60653001-60654000	-1.59426	0.342213	0.143105	0.127454	5.52179e-06	0.0263994	229	0.612672	0.138037	-1.17646	0.313293	0.309328	0.293487	0.0002223	1	hg19_cpg_inter	24	ANXA2	hg19_genes_exons
chr2:177028001-177029000	1.34536	0.289474	0.142349	0.126756	5.78519e-06	0.0267821	230	0.61843	0.159062	0.94332	0.266547	0.30763	0.291822	0.00049034	2	hg19_cpg_islands	4	HOXD3	hg19_genes_promoters
chr5:154117001-154118000	-2.13858	0.460931	0.142089	0.126491	5.99028e-06	0.0267821	230	0.487946	0.104449	-1.62234	0.418603	0.315013	0.299374	0.00014056	1	hg19_cpg_inter	1	LARP1	hg19_genes_introns
chr17:77925001-77926000	-1.44495	0.311503	0.142054	0.126455	6.0183e-06	0.0267821	230	0.273651	0.152821	-1.10608	0.282462	0.31593	0.300312	0.00012034	1	hg19_cpg_shores	10	TBC1D16	hg19_genes_promoters
chr10:43698001-43699000	-3.09662	0.668201	0.14191	0.126308	6.13535e-06	0.0267821	230	0.275405	0.071318	-2.20882	0.613268	0.308966	0.293189	0.00039113	2	hg19_cpg_islands	8	RASGEF1A	hg19_genes_exons
chr7:150778001-150779000	-2.08261	0.450039	0.141692	0.126086	6.31704e-06	0.0268825	230	0.238177	0.103014	-1.61899	0.40698	0.31736	0.301775	9.444e-05	1	hg19_cpg_islands	32	FASTK	hg19_genes_promoters
chr16:88677001-88678000	-8.02844	1.73636	0.141563	0.125956	6.4261e-06	0.0268825	230	0.902138	0.0295217	-5.88218	1.58594	0.311293	0.295569	0.00026382	1	hg19_cpg_inter	16	ZC3H18	hg19_genes_promoters
chr8:145900001-145901000	1.31474	0.285193	0.145078	0.129392	6.85648e-06	0.0272316	228	0.676887	0.163632	0.778484	0.270743	0.297141	0.280946	0.00443757	1	hg19_cpg_inter	1	ARHGAP39	hg19_genes_introns
chr1:16489001-16490000	1.73286	0.376011	0.141064	0.125447	6.86919e-06	0.0272316	230	0.538194	0.124606	1.1239	0.35075	0.300813	0.284849	0.00155602	1	hg19_cpg_inter	1		hg19_genes_intergenic
chr19:2291001-2292000	-1.69907	0.368929	0.140961	0.125342	6.96439e-06	0.0272316	230	0.244165	0.128832	-1.2068	0.338673	0.308146	0.29235	0.00044938	2	hg19_cpg_islands	11		hg19_genes_promoters
chr5:149970001-149971000	-1.78216	0.387262	0.136331	0.120556	7.08585e-06	0.0272316	229	0.211271	0.12099	-1.34136	0.351167	0.312944	0.297186	0.00017422	1	hg19_cpg_inter	1		hg19_genes_intergenic
chr22:50764001-50765000	-2.2004	0.479307	0.140483	0.124855	7.42399e-06	0.0272316	230	0.225511	0.0964927	-1.36645	0.450343	0.297563	0.281525	0.00270301	1	hg19_cpg_shores	1	DENND6B	hg19_genes_introns
chr2:134865001-134866000	1.47204	0.321145	0.140251	0.124619	7.65753e-06	0.0272316	230	0.634627	0.145014	0.910018	0.301914	0.297189	0.281143	0.0028807	1	hg19_cpg_inter	1		hg19_genes_intergenic
chr20:46486001-46487000	-1.62456	0.354876	0.140143	0.124071	7.96399e-06	0.0272316	224	0.143689	0.130986	-1.17541	0.32499	0.308648	0.292419	0.00037251	1	hg19_cpg_inter	1		hg19_genes_intergenic
chr19:533001-534000	-1.45553	0.318932	0.140002	0.124294	8.37148e-06	0.0272316	229	0.22704	0.144243	-0.991007	0.294627	0.304621	0.288672	0.00090875	1	hg19_cpg_shores	1	CDC34	hg19_genes_introns
chr8:41400001-41401000	-1.46545	0.321158	0.139575	0.123931	8.38069e-06	0.0272316	230	0.279925	0.145185	-0.97926	0.297682	0.302499	0.286574	0.00116901	1	hg19_cpg_inter	4	GINS4	hg19_genes_exons
chr6:35286001-35287000	-1.10199	0.24058	0.162863	0.144156	8.66424e-06	0.0272316	189	0.234931	0.206686	-0.778436	0.217607	0.348598	0.330301	0.00044736	1	hg19_cpg_inter	12	DEF6	hg19_genes_exons
chr16:10933001-10934000	-1.02409	0.22388	0.160038	0.141577	8.8157e-06	0.0272316	190	0.326283	0.218519	-0.999038	0.198844	0.341247	0.32305	1.20676e-06	1	hg19_cpg_inter	1		hg19_genes_intergenic
chr4:153882001-153883000	-1.24294	0.273066	0.139008	0.123282	8.81866e-06	0.0272316	229	0.40766	0.171414	-0.701816	0.26117	0.289107	0.272802	0.00776113	1	hg19_cpg_inter	2	FHDC1	hg19_genes_intronexonboundaries
chr10:34517001-34518000	1.88511	0.414255	0.139171	0.123519	8.8451e-06	0.0272316	230	0.784369	0.113974	1.31511	0.381057	0.305789	0.28994	0.00066957	1	hg19_cpg_inter	8	PARD3	hg19_genes_introns
chr3:72621001-72622000	-1.76174	0.387174	0.139159	0.123508	8.85865e-06	0.0272316	230	0.578444	0.121771	-1.2411	0.355557	0.30661	0.290779	0.00058272	1	hg19_cpg_inter	1		hg19_genes_intergenic
chr21:44802001-44803000	-2.2878	0.503218	0.139032	0.123378	9.01007e-06	0.0272316	230	0.41145	0.0944756	-1.61842	0.461769	0.306909	0.291085	0.00055399	1	hg19_cpg_inter	1		hg19_genes_intergenic
chr11:65939001-65940000	-2.15333	0.473348	0.140453	0.123763	9.19153e-06	0.0272316	214	0.883257	0.101495	-1.70543	0.431169	0.305944	0.289016	0.00010525	1	hg19_cpg_inter	2	PACS1	hg19_genes_introns
chr17:56409001-56410000	1.05422	0.230505	0.169794	0.15026	9.20499e-06	0.0272316	180	0.647551	0.217022	0.847136	0.206847	0.349646	0.330404	6.521e-05	1	hg19_cpg_inter	14	MIR142	hg19_genes_promoters
chr18:55915001-55916000	-1.11071	0.244614	0.139289	0.123568	9.25451e-06	0.0272316	229	0.398936	0.190347	-0.893404	0.219765	0.320109	0.304515	6.7e-05	1	hg19_cpg_inter	24	NEDD4L	hg19_genes_intronexonboundaries
chr20:49209001-49210000	-1.00129	0.2191	0.155817	0.135837	9.37761e-06	0.0272316	177	0.502703	0.23493	-0.741316	0.191137	0.380713	0.362282	0.00015065	1	hg19_cpg_inter	15	RIPOR3	hg19_genes_exons
chr5:149844001-149845000	-1.20771	0.266055	0.13951	0.123275	9.45415e-06	0.0272316	221	0.417032	0.180534	-0.889305	0.24316	0.308427	0.292039	0.00032192	1	hg19_cpg_inter	1		hg19_genes_intergenic
chr10:135092001-135093000	1.67079	0.368463	0.142697	0.127039	9.50579e-06	0.0272316	229	0.66558	0.124852	1.35253	0.329399	0.328523	0.313122	5.692e-05	2	hg19_cpg_shores	16	TUBGCP2	hg19_genes_exons
chr1:155291001-155292000	-1.41842	0.313235	0.138446	0.122782	9.74236e-06	0.0272316	230	0.320255	0.147992	-0.880861	0.293754	0.296901	0.280849	0.00302538	2	hg19_cpg_islands	24		hg19_genes_promoters
chr19:56122001-56123000	-1.33403	0.294619	0.138436	0.122771	9.75638e-06	0.0272316	230	0.391714	0.157894	-0.99103	0.268093	0.311022	0.295292	0.00027619	1	hg19_cpg_shelves	1	ZNF865	hg19_genes_1to5kb
chr11:1043001-1044000	-3.66066	0.808488	0.138429	0.122765	9.76431e-06	0.0272316	230	0.780992	0.0563911	-2.99418	0.724609	0.320974	0.305471	5.117e-05	1	hg19_cpg_inter	1		hg19_genes_intergenic
chr17:19314001-19315000	-2.11178	0.46689	0.138277	0.122609	9.96504e-06	0.027295	230	0.234869	0.100601	-1.35115	0.435563	0.298842	0.282834	0.00217454	1	hg19_cpg_inter	22	RNF112	hg19_genes_promoters
chr22:37608001-37609000	-2.2612	0.500166	0.138207	0.122538	1.006e-05	0.027295	230	0.362803	0.0924105	-1.54479	0.461432	0.30367	0.287772	0.00095867	1	hg19_cpg_inter	6	SSTR3	hg19_genes_promoters
chr19:7204001-7205000	-1.44919	0.319416	0.139547	0.121043	1.021e-05	0.0273448	195	0.682354	0.161824	-0.89111	0.304053	0.290759	0.27159	0.0038075	1	hg19_cpg_inter	3	INSR	hg19_genes_introns
chr1:44463001-44464000	-2.88445	0.638978	0.138335	0.122597	1.038e-05	0.0274208	229	0.813965	0.0728365	-2.13903	0.58163	0.310732	0.294923	0.00029654	1	hg19_cpg_inter	43	SLC6A9	hg19_genes_exons
chr7:97916001-97917000	-1.36431	0.30351	0.137061	0.120931	1.139e-05	0.0288241	224	0.508336	0.156426	-1.07321	0.274172	0.313546	0.297432	0.00012198	1	hg19_cpg_inter	2	BRI3	hg19_genes_introns
chr15:70449001-70450000	-1.57319	0.350318	0.139938	0.124229	1.148e-05	0.0288241	229	0.337681	0.135944	-1.12562	0.320346	0.310089	0.294266	0.00053713	1	hg19_cpg_inter	1		hg19_genes_intergenic
chr19:35791001-35792000	-1.3073	0.29125	0.137161	0.121473	1.156e-05	0.0288241	230	0.510449	0.158324	-1.01698	0.262967	0.314826	0.299183	0.00014509	3	hg19_cpg_islands	16	MAG	hg19_genes_exons
chr22:51158001-51159000	-1.77841	0.396665	0.136994	0.121303	1.182e-05	0.0288241	230	0.509242	0.11801	-1.68372	0.348232	0.338632	0.323532	2.50593e-06	2	hg19_cpg_islands	6	SHANK3	hg19_genes_exons
chr1:27941001-27942000	-1.73183	0.386348	0.136967	0.121276	1.187e-05	0.0288241	230	0.435031	0.120507	-1.34469	0.348912	0.314523	0.298873	0.00015273	2	hg19_cpg_islands	40	FGR	hg19_genes_exons
chr22:51135001-51136000	-1.68614	0.376216	0.136944	0.121252	1.19e-05	0.0288241	230	0.412486	0.125554	-1.27541	0.341149	0.311946	0.296237	0.00023625	2	hg19_cpg_islands	5	SHANK3	hg19_genes_promoters
chr1:27676001-27677000	-1.70616	0.380725	0.136928	0.121235	1.193e-05	0.0288241	230	0.395968	0.12451	-1.10229	0.35421	0.299031	0.283027	0.00210588	1	hg19_cpg_islands	36	SYTL1	hg19_genes_exons
chr7:30491001-30492000	-1.84859	0.412741	0.136847	0.121153	1.206e-05	0.0288241	230	0.765351	0.114712	-1.36188	0.375821	0.30944	0.293673	0.00036102	1	hg19_cpg_inter	3	NOD1	hg19_genes_exons
chr19:3403001-3404000	-1.98324	0.443546	0.136606	0.120908	1.245e-05	0.0290906	230	0.228638	0.106937	-1.30495	0.411304	0.300198	0.284221	0.00172698	1	hg19_cpg_inter	5	NFIC	hg19_genes_introns
chr11:123432001-123433000	-2.02747	0.453452	0.136601	0.120903	1.246e-05	0.0290906	230	0.732542	0.102301	-1.56434	0.409864	0.313685	0.298016	0.00017601	1	hg19_cpg_inter	5	GRAMD1B	hg19_genes_introns
chr19:47112001-47113000	-5.58346	1.25465	0.135927	0.120216	1.363e-05	0.0314582	230	0.875134	0.0366642	-4.00812	1.14664	0.306714	0.290885	0.00057259	1	hg19_cpg_inter	21	CALM3	hg19_genes_exons
chr17:2085001-2086000	-1.53751	0.346048	0.135698	0.119983	1.405e-05	0.0320526	230	0.290189	0.134313	-1.03766	0.31936	0.301696	0.285753	0.00133956	1	hg19_cpg_inter	3	SMG6	hg19_genes_introns
chr6:156297001-156298000	-2.56297	0.577481	0.135542	0.119824	1.435e-05	0.0320526	230	0.882893	0.0806522	-1.74276	0.532246	0.302195	0.286263	0.00123083	1	hg19_cpg_inter	1		hg19_genes_intergenic
chr4:8116001-8117000	1.1436	0.257165	0.147906	0.131033	1.437e-05	0.0320526	212	0.30472	0.187352	0.651826	0.243595	0.306629	0.289381	0.00806856	1	hg19_cpg_inter	8	ABLIM2	hg19_genes_introns
chr7:139573001-139574000	-1.18185	0.266627	0.13651	0.120666	1.475e-05	0.0320824	227	0.610479	0.178832	-0.77714	0.246152	0.305044	0.289031	0.0018196	1	hg19_cpg_inter	8	TBXAS1	hg19_genes_introns
chr20:56016001-56017000	-1.66702	0.376996	0.13502	0.119293	1.538e-05	0.0320824	230	0.306956	0.127034	-1.15898	0.346123	0.303682	0.287785	0.0009566	1	hg19_cpg_inter	1		hg19_genes_intergenic
chr11:62247001-62248000	-1.73156	0.391785	0.13495	0.119221	1.552e-05	0.0320824	230	0.44664	0.119887	-1.21013	0.35939	0.304063	0.288174	0.0008969	1	hg19_cpg_inter	1	AHNAK	hg19_genes_introns
chr2:122447001-122448000	-1.94585	0.440335	0.13493	0.119201	1.556e-05	0.0320824	230	0.45506	0.107916	-1.64654	0.392463	0.322486	0.307017	3.958e-05	1	hg19_cpg_inter	1	NIFK-AS1	hg19_genes_introns
chr8:22769001-22770000	-2.31682	0.524398	0.134898	0.119169	1.563e-05	0.0320824	230	0.268161	0.0903761	-1.65502	0.479367	0.305816	0.289967	0.0006665	1	hg19_cpg_inter	1	PEBP4	hg19_genes_introns
chr11:350001-351000	1.15158	0.260593	0.138041	0.122079	1.569e-05	0.0320824	226	0.36462	0.181854	0.900533	0.236281	0.309565	0.293508	0.00018051	1	hg19_cpg_inter	1		hg19_genes_intergenic
chr9:137128001-137129000	-1.69905	0.3852	0.134668	0.118934	1.612e-05	0.0320824	230	0.321316	0.124419	-1.01586	0.362214	0.293411	0.277279	0.00549125	1	hg19_cpg_inter	1		hg19_genes_intergenic
chr4:187921001-187922000	-1.86418	0.421691	0.14194	0.124064	1.644e-05	0.0320824	202	0.325449	0.114077	-1.35612	0.38962	0.300031	0.281707	0.00061984	1	hg19_cpg_inter	1		hg19_genes_intergenic
chr3:177169001-177170000	-2.20458	0.500356	0.134515	0.118779	1.645e-05	0.0320824	230	0.29384	0.0950847	-1.29707	0.471642	0.292467	0.276314	0.00645558	1	hg19_cpg_inter	1	LINC00578	hg19_genes_introns
chr19:17453001-17454000	-4.03597	0.916148	0.134494	0.118757	1.649e-05	0.0320824	230	0.829275	0.0508555	-2.70365	0.845811	0.300662	0.284695	0.00159642	2	hg19_cpg_shelves	9	GTPBP3	hg19_genes_exons
chr16:2975001-2976000	-3.73413	0.847862	0.134456	0.118719	1.658e-05	0.0320824	230	0.735558	0.0554957	-2.77149	0.770317	0.308883	0.293104	0.00039665	1	hg19_cpg_inter	3	FLYWCH1	hg19_genes_introns
chr3:107675001-107676000	-1.10153	0.250012	0.137067	0.121013	1.662e-05	0.0320824	225	0.261757	0.19119	-0.831806	0.226023	0.315874	0.29989	0.00029499	1	hg19_cpg_inter	1		hg19_genes_intergenic
chr15:75019001-75020000	-1.65672	0.376264	0.134421	0.118683	1.665e-05	0.0320824	230	0.369914	0.123389	-1.08301	0.348711	0.298912	0.282905	0.00214887	2	hg19_cpg_islands	9	CYP1A1	hg19_genes_1to5kb
chr1:833001-834000	0.857207	0.193273	0.161447	0.141119	1.674e-05	0.0320824	173	0.53708	0.275933	0.584015	0.177938	0.333015	0.31268	0.00125898	1	hg19_cpg_inter	1		hg19_genes_intergenic
chr17:75380001-75381000	-1.02287	0.231113	0.146492	0.126984	1.686e-05	0.0320824	183	0.371375	0.234248	-0.826636	0.200671	0.37011	0.352009	5.865e-05	1	hg19_cpg_inter	6	9-Sep	hg19_genes_introns
chr9:130517001-130518000	-1.75697	0.399464	0.134269	0.118528	1.699e-05	0.0320824	230	0.500548	0.116347	-1.18824	0.368183	0.301264	0.285311	0.00144124	2	hg19_cpg_islands	15	SH2D3C	hg19_genes_promoters
chr1:153652001-153653000	-4.42507	1.00641	0.134224	0.118483	1.71e-05	0.0320824	230	0.0829947	0.0465512	-3.69168	0.898694	0.320397	0.304881	5.643e-05	2	hg19_cpg_islands	8	NPR1	hg19_genes_promoters
chr1:16862001-16863000	-2.6787	0.609919	0.134065	0.118321	1.746e-05	0.0322339	230	0.326626	0.0805529	-1.72263	0.566576	0.297679	0.281644	0.00265023	2	hg19_cpg_islands	8		hg19_genes_promoters
chr20:43229001-43230000	-1.32777	0.302325	0.133357	0.117528	1.75e-05	0.0322339	229	0.267923	0.154707	-0.904667	0.277762	0.303523	0.287549	0.00130579	1	hg19_cpg_inter	3	PKIG	hg19_genes_introns
chr9:139158001-139159000	-2.87222	0.654645	0.133924	0.118177	1.779e-05	0.0324801	230	0.831624	0.0703459	-2.40838	0.584138	0.320756	0.305248	5.309e-05	1	hg19_cpg_shores	1		hg19_genes_intergenic
chr9:35609001-35610000	-1.82831	0.417432	0.133684	0.117933	1.837e-05	0.0332317	230	0.736526	0.112966	-1.04649	0.394846	0.290781	0.274589	0.00862717	2	hg19_cpg_shelves	10	TESK1	hg19_genes_exons
chr11:47594001-47595000	-1.39376	0.318534	0.133546	0.117792	1.871e-05	0.0335459	230	0.299903	0.147115	-1.02392	0.289736	0.307523	0.291713	0.00049927	1	hg19_cpg_inter	17	PTPMT1	hg19_genes_exons
chr19:30600001-30601000	-2.76777	0.633647	0.133952	0.118134	1.935e-05	0.0343837	229	0.823492	0.0748251	-1.90391	0.58276	0.301462	0.285441	0.00126234	1	hg19_cpg_inter	1		hg19_genes_intergenic
chr10:6260001-6261000	-2.18667	0.500996	0.133213	0.117381	1.963e-05	0.0344564	229	0.879733	0.0939259	-1.43446	0.464705	0.29618	0.280037	0.0022855	2	hg19_cpg_shores	5	PFKFB3	hg19_genes_introns
chr7:100045001-100046000	1.09956	0.251947	0.140388	0.124245	1.988e-05	0.0344564	223	0.732146	0.190293	0.845866	0.225158	0.331049	0.315272	0.00022244	1	hg19_cpg_inter	1		hg19_genes_intergenic
chr1:53034001-53035000	-2.84445	0.648129	0.146254	0.126283	1.991e-05	0.0344564	181	0.505555	0.0831187	-1.99897	0.585974	0.335967	0.316436	0.00080768	1	hg19_cpg_inter	1		hg19_genes_intergenic
chr3:14844001-14845000	-2.10122	0.482314	0.132944	0.11718	2.027e-05	0.0347852	230	0.608234	0.0972959	-1.76239	0.430288	0.320113	0.304591	5.921e-05	1	hg19_cpg_inter	1		hg19_genes_intergenic
chr3:52746001-52747000	-5.35468	1.2312	0.132711	0.116942	2.091e-05	0.0355751	230	0.955236	0.0374134	-4.75678	1.08996	0.326598	0.311223	1.966e-05	1	hg19_cpg_inter	4	NEK4	hg19_genes_intronexonboundaries
chr6:7706001-7707000	2.93291	0.674951	0.131427	0.11549	2.132e-05	0.0359748	228	0.745165	0.0702515	1.84747	0.628611	0.294601	0.278348	0.00364912	1	hg19_cpg_inter	1		hg19_genes_intergenic
chr19:15564001-15565000	-0.967845	0.222858	0.141509	0.124425	2.229e-05	0.0372975	211	0.354592	0.215513	-0.804057	0.195391	0.350535	0.334298	5.655e-05	2	hg19_cpg_islands	11	RASAL3	hg19_genes_exons
chr1:249141001-249142000	-5.93349	1.36897	0.141183	0.124261	2.3e-05	0.0381262	213	0.959872	0.0350147	-5.24634	1.2135	0.332216	0.315686	2.413e-05	2	hg19_cpg_islands	6		hg19_genes_promoters
chr11:75313001-75314000	-3.00081	0.693813	0.131927	0.116072	2.316e-05	0.0381262	229	0.900724	0.0664966	-2.17201	0.632256	0.305115	0.289177	0.00070847	1	hg19_cpg_inter	3	MAP6	hg19_genes_exons
chr12:108039001-108040000	-1.82343	0.422575	0.131637	0.115848	2.411e-05	0.0393674	230	0.295404	0.11731	-1.44729	0.379794	0.31355	0.297878	0.00018006	1	hg19_cpg_inter	4	BTBD11	hg19_genes_introns
chr11:63532001-63533000	-3.57978	0.830405	0.131506	0.115716	2.454e-05	0.0397317	230	0.902373	0.0562814	-3.08566	0.737991	0.322144	0.306668	4.195e-05	3	hg19_cpg_islands	7	C11orf95	hg19_genes_exons
chr22:24820001-24821000	-5.52299	1.28445	0.131162	0.115365	2.568e-05	0.0412587	230	0.0816688	0.0364609	-4.40362	1.15353	0.313702	0.298034	0.00017548	2	hg19_cpg_islands	5	SPECC1L	hg19_genes_introns
chr16:27378001-27379000	3.20874	0.748276	0.130795	0.114991	2.697e-05	0.0426327	230	0.122337	0.0655343	1.92463	0.700608	0.292415	0.27626	0.00651347	1	hg19_cpg_inter	1		hg19_genes_intergenic
chr14:69229001-69230000	-2.17785	0.508023	0.130755	0.114951	2.711e-05	0.0426327	230	0.117801	0.0907094	-1.4626	0.46765	0.299328	0.283331	0.00200204	1	hg19_cpg_inter	1		hg19_genes_intergenic
chr12:49783001-49784000	1.37997	0.321917	0.131094	0.115223	2.718e-05	0.0426327	229	0.733705	0.144591	1.15244	0.287064	0.319378	0.303768	8.192e-05	2	hg19_cpg_islands	8	LOC100335030	hg19_genes_5UTRs
chr12:113677001-113678000	-0.964125	0.224467	0.149792	0.131798	2.789e-05	0.042747	198	0.380264	0.224092	-0.674748	0.201714	0.342548	0.325063	0.00099309	1	hg19_cpg_inter	3	TPCN1	hg19_genes_introns
chr10:82025001-82026000	-1.01335	0.236476	0.128935	0.112183	2.791e-05	0.042747	217	0.352162	0.204354	-0.690394	0.21754	0.298672	0.281731	0.00173469	1	hg19_cpg_inter	1		hg19_genes_intergenic
chr15:40583001-40584000	-1.32987	0.310925	0.13045	0.11464	2.823e-05	0.042747	230	0.341398	0.153803	-0.972158	0.282624	0.305552	0.289697	0.00069702	3	hg19_cpg_islands	48	PLCB2	hg19_genes_promoters
chr1:92947001-92948000	-1.85368	0.433406	0.130446	0.114636	2.825e-05	0.042747	230	0.166953	0.106686	-1.22528	0.399821	0.298132	0.282107	0.00245359	1	hg19_cpg_islands	3	GFI1	hg19_genes_introns
chr17:2879001-2880000	-4.17748	0.97686	0.130428	0.114618	2.831e-05	0.042747	230	0.859894	0.0494871	-2.97096	0.891486	0.303362	0.287457	0.00100999	1	hg19_cpg_inter	2	RAP1GAP2	hg19_genes_introns
chr19:1070001-1071000	-1.66622	0.391423	0.129817	0.113995	3.071e-05	0.0460138	230	0.317799	0.120568	-1.29499	0.352642	0.310491	0.294749	0.00030217	2	hg19_cpg_islands	6	ARHGAP45	hg19_genes_promoters
chr3:29072001-29073000	1.29791	0.305135	0.128987	0.113078	3.117e-05	0.0463686	229	0.4238	0.152597	0.95517	0.276496	0.30754	0.291658	0.00066229	1	hg19_cpg_inter	1		hg19_genes_intergenic
chr22:50347001-50348000	-1.07571	0.252977	0.134588	0.118412	3.163e-05	0.0466946	224	0.386689	0.191549	-0.773326	0.230328	0.308872	0.292649	0.00093152	1	hg19_cpg_inter	1		hg19_genes_intergenic
chr22:38178001-38179000	-1.51906	0.357703	0.129502	0.113675	3.202e-05	0.0469255	230	0.386758	0.133145	-0.838404	0.338589	0.287968	0.271711	0.0140378	1	hg19_cpg_inter	1		hg19_genes_intergenic
chr5:172175001-172176000	-1.68119	0.396454	0.129312	0.113481	3.283e-05	0.0474183	230	0.463263	0.120697	-1.19407	0.361663	0.302739	0.28682	0.00112243	3	hg19_cpg_islands	1		hg19_genes_intergenic
chr1:2979001-2980000	-1.56546	0.369223	0.12929	0.113459	3.293e-05	0.0474183	230	0.318746	0.127761	-1.04296	0.339943	0.298198	0.282175	0.00242629	2	hg19_cpg_islands	1	LINC00982	hg19_genes_exons
chr7:41926001-41927000	-1.17121	0.276192	0.13222	0.11615	3.306e-05	0.0474183	226	0.39645	0.168412	-0.932059	0.246311	0.32367	0.307942	0.00020006	1	hg19_cpg_inter	1		hg19_genes_intergenic
chr7:2059001-2060000	1.65144	0.389734	0.127552	0.111617	3.333e-05	0.0474608	229	0.310105	0.123362	1.16722	0.355755	0.301128	0.285099	0.00120451	2	hg19_cpg_islands	8	MAD1L1	hg19_genes_introns
chr15:80743001-80744000	-1.82228	0.43041	0.129103	0.113268	3.376e-05	0.0475319	230	0.728641	0.107855	-1.2366	0.395174	0.299361	0.283365	0.00199093	1	hg19_cpg_inter	18	ARNT2	hg19_genes_5UTRs
chr8:38307001-38308000	-1.44466	0.341272	0.129082	0.113248	3.385e-05	0.0475319	230	0.354595	0.137221	-0.998281	0.312512	0.30062	0.284652	0.0016078	1	hg19_cpg_inter	15	FGFR1	hg19_genes_introns
chr9:101679001-101680000	-1.70901	0.404154	0.128941	0.113104	3.449e-05	0.0479766	230	0.592419	0.116898	-1.26504	0.366473	0.305804	0.289955	0.00066787	1	hg19_cpg_inter	1		hg19_genes_intergenic
chr9:132104001-132105000	-1.62367	0.383665	0.133253	0.116664	3.467e-05	0.0479766	218	0.843204	0.124179	-1.13046	0.344693	0.327472	0.311306	0.00121855	1	hg19_cpg_inter	2		hg19_genes_promoters
chr1:158146001-158147000	1.77991	0.421197	0.128856	0.113017	3.488e-05	0.0479766	230	0.759632	0.109956	1.07712	0.393125	0.292292	0.276135	0.00665255	1	hg19_cpg_shores	4	CD1D	hg19_genes_1to5kb
chr20:61807001-61808000	-4.816	1.1417	0.128621	0.112778	3.598e-05	0.0485096	230	0.0885877	0.0402287	-3.7917	1.02641	0.310969	0.295237	0.00027872	1	hg19_cpg_islands	1	MIR124-3	hg19_genes_1to5kb
chr2:171572001-171573000	-18.9479	4.49336	0.128578	0.112734	3.619e-05	0.0485096	230	0.0274381	0.0107713	-12.6311	4.13468	0.29795	0.281921	0.00253062	1	hg19_cpg_islands	7	LINC01124	hg19_genes_promoters
chr1:18957001-18958000	-28.0222	6.64781	0.128528	0.112683	3.643e-05	0.0485096	230	0.0175498	0.00705833	-21.1314	6.01149	0.307126	0.291307	0.00053397	1	hg19_cpg_islands	9	PAX7	hg19_genes_promoters
chr3:71275001-71276000	2.04686	0.485763	0.128953	0.113044	3.673e-05	0.0485096	229	0.678145	0.0972456	1.48807	0.441375	0.30494	0.288998	0.00088452	1	hg19_cpg_inter	9	FOXP1	hg19_genes_introns
chr15:68906001-68907000	-1.44314	0.342637	0.128423	0.112577	3.694e-05	0.0485096	230	0.315451	0.138366	-1.14198	0.307811	0.311317	0.295593	0.00026277	1	hg19_cpg_inter	2	CORO2B	hg19_genes_introns
chr18:77218001-77219000	-1.34097	0.318404	0.128413	0.112566	3.699e-05	0.0485096	230	0.245766	0.146269	-0.998563	0.288415	0.306019	0.290174	0.00064407	3	hg19_cpg_islands	11	NFATC1	hg19_genes_introns
chr14:94373001-94374000	-0.945369	0.224328	0.120992	0.104406	3.709e-05	0.0485096	222	0.403347	0.212195	-0.723514	0.202317	0.303843	0.287346	0.00043233	1	hg19_cpg_inter	1	FAM181A-AS1	hg19_genes_introns
chr17:65971001-65972000	-2.12813	0.505476	0.12837	0.112522	3.72e-05	0.0485096	230	0.65308	0.0920832	-1.51253	0.460846	0.302349	0.286421	0.00119916	1	hg19_cpg_inter	15	BPTF	hg19_genes_exons
chr4:151504001-151505000	-1.35623	0.322497	0.138288	0.122331	3.818e-05	0.0494661	226	0.519328	0.149952	-0.847795	0.297477	0.310039	0.293994	0.00479779	2	hg19_cpg_islands	6	MAB21L2	hg19_genes_5UTRs

## Sheet: table-S7
Supplementary Table-7: CpG regions associated with SI (Insulin sensitivity index from FSIGT)
Results for CpG regions (tilling window of 1000bp region) associated with SI at FDR-P<0.05 in epigenome wide association study (EWAS) are shown.
Results are sorted by EWAS p-value.
	age, gender, admixture adjusted						Methylation Level			age, gender, admixture and cell type adjusted					ANNOTATR CpG region annotation
CpG_region	Beta	StdErr	R2_full	adj_R2_full	P-value	FDR_P	N	Mean	StDev	Beta	StdErr	R2_full	adj_R2_full	P-value	CountOfCpG_region_CpGannot	annottype_CpG	CountOf_gene annot	annotsymbol_gene	annottype_gene
chr17:7757001-7758000	-5.91924	0.952746	0.161488	0.146515	2.50662e-09	0.000503329	230	0.773117	0.0522397	-4.74959	0.960906	0.222618	0.205188	1.51244e-06	2	hg19_cpg_islands	9	TMEM88	hg19_genes_promoters
chr1:27676001-27677000	-2.20572	0.370203	0.151471	0.136319	9.80498e-09	0.000907593	230	0.395968	0.12451	-1.80291	0.366432	0.221915	0.204469	1.67912e-06	1	hg19_cpg_islands	36	SYTL1	hg19_genes_exons
chr19:6271001-6272000	-1.38252	0.234218	0.151217	0.135643	1.35597e-08	0.000907593	224	0.327108	0.193381	-1.20992	0.22537	0.236637	0.219048	2.03421e-07	2	hg19_cpg_islands	1	MLLT1	hg19_genes_introns
chr17:76333001-76334000	1.34767	0.247251	0.13525	0.119236	1.36459e-07	0.00685023	222	0.55899	0.192748	0.979389	0.26041	0.18642	0.1675	0.00021823	2	hg19_cpg_shelves	1		hg19_genes_intergenic
chr18:58324001-58325000	1.35906	0.250748	0.155877	0.137917	1.81193e-07	0.00727671	194	0.621955	0.197855	1.16259	0.244229	0.231479	0.21093	3.86202e-06	1	hg19_cpg_inter	1		hg19_genes_intergenic
chr13:40342001-40343000	-1.01909	0.19422	0.135644	0.118094	3.97602e-07	0.0133064	203	0.449284	0.25731	-0.916218	0.1831	0.244256	0.224976	1.24601e-06	1	hg19_cpg_inter	1	COG6	hg19_genes_introns
chr3:16596001-16597000	-1.31911	0.257755	0.12069	0.104847	6.68997e-07	0.0168683	228	0.411487	0.178084	-1.02569	0.2555	0.195275	0.177069	8.163e-05	1	hg19_cpg_inter	1		hg19_genes_intergenic
chr14:97093001-97094000	2.27544	0.446557	0.119105	0.103374	7.3834e-07	0.0168683	230	0.533936	0.10611	1.63471	0.456616	0.184329	0.166041	0.00042153	1	hg19_cpg_inter	1		hg19_genes_intergenic
chr11:95600001-95601000	1.18712	0.233292	0.122114	0.105931	7.80453e-07	0.0168683	223	0.701773	0.194862	0.952314	0.226754	0.210883	0.192616	3.907e-05	1	hg19_cpg_inter	5	MTMR2	hg19_genes_introns
chr12:12175001-12176000	2.29233	0.452298	0.118124	0.102376	8.40053e-07	0.0168683	230	0.598405	0.103327	1.78341	0.446955	0.194927	0.176876	8.959e-05	1	hg19_cpg_inter	1	ETV6	hg19_genes_introns
chr2:242500001-242501000	-1.23298	0.246452	0.12718	0.110866	1.17629e-06	0.0214726	220	0.292784	0.192717	-1.07978	0.233592	0.231205	0.213158	6.56793e-06	1	hg19_cpg_shores	2	BOK	hg19_genes_introns
chr19:19625001-19626000	-1.66118	0.334681	0.114399	0.098585	1.3705e-06	0.0218106	230	0.535029	0.139466	-1.37027	0.323917	0.201525	0.183622	3.408e-05	1	hg19_cpg_islands	6		hg19_genes_exons
chr10:126826001-126827000	-1.30809	0.263209	0.122211	0.105084	1.41204e-06	0.0218106	211	0.562436	0.186924	-1.07648	0.257727	0.197725	0.178061	4.38e-05	1	hg19_cpg_inter	4	CTBP2	hg19_genes_introns
chr14:72062001-72063000	-3.03595	0.615774	0.113228	0.097392	1.59813e-06	0.0229217	230	0.828394	0.0740354	-2.70008	0.584953	0.212674	0.195021	6.60639e-06	1	hg19_cpg_inter	5	SIPA1L1	hg19_genes_introns
chr1:53034001-53035000	-3.18262	0.648879	0.139964	0.120306	2.12638e-06	0.0234396	181	0.505555	0.0831187	-2.53513	0.629191	0.235255	0.21328	8.352e-05	1	hg19_cpg_inter	1		hg19_genes_intergenic
chr6:15505001-15506000	-1.48121	0.304489	0.110923	0.095046	2.16145e-06	0.0234396	230	0.248188	0.152053	-1.21915	0.29445	0.199025	0.181066	4.918e-05	1	hg19_cpg_inter	3	JARID2	hg19_genes_introns
chr19:1815001-1816000	-6.08236	1.25141	0.110777	0.094898	2.20297e-06	0.0234396	230	0.887817	0.0375611	-4.98684	1.21134	0.198373	0.180399	5.411e-05	2	hg19_cpg_islands	12	REXO1	hg19_genes_exons
chr6:21139001-21140000	-1.15512	0.23765	0.111477	0.095174	2.23704e-06	0.0234396	224	0.545876	0.195691	-0.957706	0.230149	0.196935	0.178431	4.563e-05	1	hg19_cpg_inter	4	CDKAL1	hg19_genes_introns
chr16:72318001-72319000	2.75991	0.567779	0.119604	0.102509	2.31401e-06	0.0234396	212	0.883922	0.0829543	2.68808	0.534382	0.224421	0.205504	1.06772e-06	1	hg19_cpg_inter	1		hg19_genes_intergenic
chr20:60869001-60870000	-1.70732	0.352193	0.110334	0.094447	2.33463e-06	0.0234396	230	0.634164	0.129755	-1.5242	0.334168	0.211052	0.193363	8.39373e-06	1	hg19_cpg_inter	9	OSBPL2	hg19_genes_exons
chr11:1155001-1156000	-3.02704	0.628864	0.109145	0.093237	2.72728e-06	0.0260779	230	0.843505	0.0721199	-2.53509	0.605029	0.2004	0.182472	4.02e-05	3	hg19_cpg_islands	8	MUC5B	hg19_genes_exons
chr12:58132001-58133000	-1.93138	0.406432	0.107021	0.091075	3.59938e-06	0.032648	230	0.308173	0.114124	-1.58445	0.392735	0.196123	0.178099	7.522e-05	4	hg19_cpg_islands	7	AGAP2	hg19_genes_promoters
chr2:10361001-10362000	1.44307	0.304697	0.117104	0.100207	4.01806e-06	0.032648	214	0.743705	0.153053	1.34476	0.288557	0.215459	0.1966	5.63439e-06	1	hg19_cpg_inter	1		hg19_genes_intergenic
chr19:17453001-17454000	-4.25536	0.90116	0.105992	0.090028	4.11636e-06	0.032648	230	0.829275	0.0508555	-3.27157	0.886095	0.187138	0.168913	0.00027967	2	hg19_cpg_shelves	9	GTPBP3	hg19_genes_exons
chr2:71734001-71735000	-2.58284	0.547958	0.1057	0.08973	4.27637e-06	0.032648	230	0.730466	0.0868321	-2.04922	0.533846	0.19091	0.172769	0.00016119	1	hg19_cpg_inter	15	DYSF	hg19_genes_introns
chr11:118489001-118490000	-1.56608	0.332287	0.105681	0.089711	4.28665e-06	0.032648	230	0.260063	0.138095	-1.28868	0.320671	0.195697	0.177664	8.005e-05	1	hg19_cpg_inter	5	PHLDB1	hg19_genes_introns
chr1:2979001-2980000	-1.72871	0.367215	0.105497	0.089524	4.39109e-06	0.032648	230	0.318746	0.127761	-1.34997	0.359306	0.1888	0.170611	0.00021942	2	hg19_cpg_islands	1	LINC00982	hg19_genes_exons
chr1:151345001-151346000	-1.59448	0.339506	0.105115	0.089135	4.6152e-06	0.032648	230	0.352476	0.138618	-1.33896	0.325997	0.198111	0.180131	5.622e-05	1	hg19_cpg_inter	20	SELENBP1	hg19_genes_promoters
chr7:157512001-157513000	-4.54322	0.968362	0.104951	0.088968	4.7151e-06	0.032648	230	0.89005	0.0476757	-3.45616	0.954472	0.185348	0.167083	0.00036324	1	hg19_cpg_inter	5	PTPRN2	hg19_genes_introns
chr9:126970001-126971000	1.21994	0.260486	0.103773	0.087552	4.92783e-06	0.0329836	227	0.599054	0.184177	0.969962	0.253948	0.18804	0.169586	0.00017393	1	hg19_cpg_inter	1		hg19_genes_intergenic
chr16:10933001-10934000	-1.02974	0.2202	0.136309	0.117533	5.63596e-06	0.0361975	190	0.326283	0.218519	-1.02014	0.209204	0.224729	0.203547	2.33834e-06	1	hg19_cpg_inter	1		hg19_genes_intergenic
chr6:149772001-149773000	-5.10968	1.09976	0.103403	0.087392	5.76852e-06	0.0361975	230	0.0619645	0.0428094	-4.08427	1.06801	0.190534	0.172385	0.0001703	2	hg19_cpg_islands	3	ZC3H12D	hg19_genes_exons
chr17:4425001-4426000	-1.8437	0.399373	0.103783	0.087635	6.60429e-06	0.037109	228	0.804523	0.116572	-1.41087	0.39247	0.185596	0.167171	0.00040028	1	hg19_cpg_inter	1	SPNS2	hg19_genes_introns
chr7:84945001-84946000	-3.48466	0.755299	0.103465	0.087383	6.6729e-06	0.037109	229	0.726078	0.0624514	-2.92648	0.724875	0.196828	0.178738	7.448e-05	1	hg19_cpg_inter	1		hg19_genes_intergenic
chr11:10161001-10162000	-1.35195	0.29343	0.102092	0.086058	6.84233e-06	0.037109	230	0.551397	0.160042	-1.15891	0.280265	0.198876	0.180914	5.026e-05	1	hg19_cpg_inter	2	SBF2	hg19_genes_introns
chr11:65352001-65353000	-6.61253	1.43854	0.10173	0.085689	7.17217e-06	0.037109	230	0.823694	0.0346815	-4.79186	1.43529	0.17851	0.160091	0.00098669	2	hg19_cpg_islands	5	EHBP1L1	hg19_genes_exons
chr7:150778001-150779000	-2.06922	0.45027	0.101691	0.085649	7.20887e-06	0.037109	230	0.238177	0.103014	-1.72507	0.432571	0.194868	0.176816	9.037e-05	1	hg19_cpg_islands	32	FASTK	hg19_genes_promoters
chr7:151157001-151158000	-2.28711	0.498124	0.101682	0.085496	7.37044e-06	0.037109	228	0.097263	0.0932976	-1.90941	0.478623	0.194555	0.176332	9.009e-05	1	hg19_cpg_inter	1		hg19_genes_intergenic
chr1:155291001-155292000	-1.44245	0.314453	0.10141	0.085363	7.47701e-06	0.037109	230	0.320255	0.147992	-1.06916	0.311462	0.180739	0.16237	0.0007122	2	hg19_cpg_islands	24		hg19_genes_promoters
chr13:100516001-100517000	-2.22222	0.484595	0.1015	0.085384	7.54072e-06	0.037109	229	0.715658	0.0966671	-1.97096	0.461293	0.19844	0.180387	2.866e-05	1	hg19_cpg_inter	6	CLYBL	hg19_genes_intronexonboundaries
chr17:2879001-2880000	-4.28125	0.933927	0.101308	0.085259	7.57703e-06	0.037109	230	0.859894	0.0494871	-3.407	0.906996	0.188779	0.17059	0.00022009	1	hg19_cpg_inter	2	RAP1GAP2	hg19_genes_introns
chr17:77925001-77926000	-1.41332	0.310734	0.100107	0.084037	8.85718e-06	0.0423458	230	0.273651	0.152821	-1.16941	0.298851	0.192868	0.174771	0.00012108	1	hg19_cpg_shores	10	TBC1D16	hg19_genes_promoters
chr9:133346001-133347000	-2.55103	0.562175	0.099754	0.083678	9.27298e-06	0.0433027	230	0.860959	0.081686	-2.21252	0.535433	0.198797	0.180833	5.084e-05	1	hg19_cpg_inter	21	ASS1	hg19_genes_exons
chr8:22769001-22770000	-2.35176	0.519945	0.099264	0.08318	9.8819e-06	0.0450974	230	0.268161	0.0903761	-1.88448	0.503579	0.188415	0.170218	0.0002321	1	hg19_cpg_inter	1	PEBP4	hg19_genes_introns
chr16:32095001-32096000	3.79901	0.843075	0.098699	0.082605	1.063e-05	0.0473697	230	0.550404	0.0545948	3.62535	0.790798	0.211739	0.194065	7.58391e-06	2	hg19_cpg_islands	1		hg19_genes_intergenic
chr16:3234001-3235000	-3.49496	0.775914	0.099556	0.083034	1.085e-05	0.0473697	224	0.0779714	0.0607328	-3.20313	0.730885	0.208927	0.190699	1.827e-05	2	hg19_cpg_islands	7		hg19_genes_promoters

## Sheet: table-S8
Supplementary Table-8: CpG regions associated with BMI (Body Mass Index)
Results for CpG regions (tilling window of 1000bp region) associated with BMI at FDR-P<0.05 in epigenome wide association study (EWAS) are shown.
Results are sorted by EWAS p-value.
	age, gender, admixture adjusted						Methylation Level			age, gender, admixture and cell type adjusted					ANNOTATR CpG region annotation
CpG_region	Beta	StdErr	R2_full	adj_R2_full	P-value	FDR_P	N	Mean	StDev	Beta	StdErr	R2_full	adj_R2_full	P-value	CountOfCpG_region_CpGannot	annottype_CpG	CountOf_gene annot	annotsymbol_gene	annottype_gene
chr17:7757001-7758000	4.50322	0.642214	0.24143	0.227944	2.7148e-11	5.45129e-06	230	0.773117	0.0522397	3.13945	0.595503	0.405675	0.392409	3.1725e-07	2	hg19_cpg_islands	9	TMEM88	hg19_genes_promoters
chr17:76333001-76334000	-1.0407	0.166404	0.220833	0.20647	2.09817e-09	0.000210656	222	0.55899	0.192748	-0.590688	0.16165	0.374764	0.360291	0.00032401	2	hg19_cpg_shelves	1		hg19_genes_intergenic
chr3:16596001-16597000	1.02343	0.174249	0.199411	0.185051	1.5385e-08	0.000901522	228	0.411487	0.178084	0.695571	0.157478	0.389779	0.376036	1.564e-05	1	hg19_cpg_inter	1		hg19_genes_intergenic
chr16:72981001-72982000	1.80844	0.310352	0.196863	0.182585	1.93861e-08	0.000901522	230	0.650838	0.0996883	1.34763	0.274844	0.396687	0.38322	1.80999e-06	1	hg19_cpg_inter	2	ZFHX3	hg19_genes_introns
chr7:157512001-157513000	3.76642	0.649512	0.195844	0.181548	2.24483e-08	0.000901522	230	0.89005	0.0476757	2.5667	0.587707	0.384354	0.370612	1.923e-05	1	hg19_cpg_inter	5	PTPRN2	hg19_genes_introns
chr11:119514001-119515000	1.35499	0.245155	0.19339	0.178791	9.13183e-08	0.00294256	226	0.740356	0.131229	0.991364	0.215141	0.404295	0.390756	6.88645e-06	1	hg19_cpg_inter	1	NECTIN1	hg19_genes_introns
chr11:63974001-63975000	-0.949104	0.172497	0.181855	0.167179	1.02579e-07	0.00294256	228	0.339168	0.183864	-0.689898	0.152399	0.388735	0.374967	9.76026e-06	2	hg19_cpg_islands	16	FERMT3	hg19_genes_promoters
chr5:60630001-60631000	1.34359	0.250083	0.18076	0.166195	1.93399e-07	0.00393202	230	0.284985	0.129424	0.893411	0.225311	0.375751	0.361816	9.866e-05	1	hg19_cpg_shores	1	ZSWIM6	hg19_genes_introns
chr8:125774001-125775000	-0.815273	0.151537	0.189458	0.173795	2.00627e-07	0.00393202	212	0.337502	0.211162	-0.572775	0.136414	0.37916	0.364091	3.992e-05	1	hg19_cpg_inter	1		hg19_genes_intergenic
chr5:137990001-137991000	-1.43862	0.269311	0.179697	0.165113	2.24842e-07	0.00393202	230	0.371342	0.118918	-0.902149	0.245377	0.369953	0.355889	0.00029593	1	hg19_cpg_inter	1		hg19_genes_intergenic
chr2:127812001-127813000	1.58404	0.298116	0.183497	0.168652	2.63075e-07	0.00393202	225	0.848658	0.109022	1.06341	0.267996	0.379086	0.36491	9.824e-05	1	hg19_cpg_inter	13	BIN1	hg19_genes_introns
chr5:55380001-55381000	0.974525	0.183644	0.178883	0.164221	2.68077e-07	0.00393202	229	0.324731	0.17153	0.697222	0.162732	0.383331	0.369505	2.724e-05	1	hg19_cpg_inter	1		hg19_genes_intergenic
chr16:679001-680000	2.14065	0.403971	0.178219	0.163609	2.77151e-07	0.00393202	230	0.45248	0.0812049	1.45978	0.361514	0.377263	0.363362	7.406e-05	1	hg19_cpg_shores	14		hg19_genes_promoters
chr16:49869001-49870000	1.58809	0.299873	0.17811	0.163499	2.81442e-07	0.00393202	230	0.379277	0.110134	1.11748	0.266663	0.380501	0.366672	4.004e-05	1	hg19_cpg_shelves	1	ZNF423	hg19_genes_introns
chr9:116930001-116931000	1.43421	0.271267	0.177808	0.163191	2.93727e-07	0.00393202	230	0.677788	0.121524	0.898467	0.246832	0.369242	0.355163	0.00033858	3	hg19_cpg_islands	4	COL27A1	hg19_genes_5UTRs
chr13:113926001-113927000	-2.09923	0.398079	0.177338	0.162713	3.13888e-07	0.00393929	230	0.773361	0.0791483	-0.910447	0.387634	0.34799	0.333436	0.0197081	1	hg19_cpg_inter	1		hg19_genes_intergenic
chr1:89932001-89933000	-0.726794	0.138701	0.175573	0.159408	3.99238e-07	0.0047157	209	0.580702	0.237178	-0.454233	0.124672	0.383462	0.368276	0.00034164	1	hg19_cpg_inter	1		hg19_genes_intergenic
chr2:121508001-121509000	1.61234	0.315389	0.171855	0.157132	6.80052e-07	0.00758635	230	0.818783	0.0992145	1.22552	0.275643	0.386107	0.372404	1.377e-05	1	hg19_cpg_inter	2	GLI2	hg19_genes_introns
chr1:241715001-241716000	-1.52144	0.299622	0.170699	0.155956	8.00065e-07	0.00845543	230	0.720128	0.10548	-0.877615	0.275139	0.360959	0.346694	0.00162796	1	hg19_cpg_inter	3	KMO	hg19_genes_introns
chr5:138189001-138190000	1.41445	0.282473	0.168341	0.153556	1.11399e-06	0.0111845	230	0.638804	0.117076	1.06834	0.246875	0.383475	0.369714	2.274e-05	1	hg19_cpg_inter	5	CTNNA1	hg19_genes_introns
chr5:112601001-112602000	1.50822	0.30313	0.17012	0.155031	1.3115e-06	0.0117954	225	0.831652	0.106137	1.17977	0.26126	0.398041	0.384298	1.031e-05	1	hg19_cpg_inter	5	MCC	hg19_genes_introns
chr1:27676001-27677000	1.28982	0.259725	0.166969	0.15216	1.35027e-06	0.0117954	230	0.395968	0.12451	0.81934	0.233772	0.366665	0.352528	0.0005516	1	hg19_cpg_islands	36	SYTL1	hg19_genes_exons
chr19:7805001-7806000	-2.64169	0.532447	0.166815	0.152003	1.37982e-06	0.0117954	230	0.809671	0.0604267	-1.17898	0.507357	0.347659	0.333098	0.021034	1	hg19_cpg_inter	24	CD209	hg19_genes_exons
chr9:130517001-130518000	1.34211	0.270763	0.166661	0.151846	1.4098e-06	0.0117954	230	0.500548	0.116347	0.886699	0.242016	0.369704	0.355635	0.00031021	2	hg19_cpg_islands	15	SH2D3C	hg19_genes_promoters
chr22:18260001-18261000	-1.80013	0.365798	0.165482	0.150646	1.66284e-06	0.0133264	230	0.378192	0.0874437	-0.995461	0.336533	0.357047	0.342696	0.00342863	1	hg19_cpg_shelves	9	BID	hg19_genes_1to5kb
chr16:30736001-30737000	-1.65076	0.336095	0.165169	0.150328	1.73728e-06	0.0133264	230	0.693501	0.0983477	-0.916745	0.308892	0.357209	0.342861	0.00332465	1	hg19_cpg_inter	6	SRCAP	hg19_genes_exons
chr14:104651001-104652000	1.21591	0.247898	0.164948	0.150103	1.7919e-06	0.0133264	230	0.275729	0.128199	0.753266	0.223732	0.364112	0.349918	0.00089481	1	hg19_cpg_inter	1		hg19_genes_intergenic
chr20:50114001-50115000	-1.35157	0.276785	0.16557	0.15067	1.98551e-06	0.0138837	229	0.197277	0.112973	-0.96246	0.24416	0.375488	0.361485	0.00010821	1	hg19_cpg_inter	8	NFATC2	hg19_genes_introns
chr7:641001-642000	-2.93255	0.600937	0.164131	0.149271	2.00895e-06	0.0138837	230	0.0727615	0.0518813	-2.0302	0.532128	0.372697	0.358695	0.00017599	1	hg19_cpg_shelves	11	PRKAR1B	hg19_genes_promoters
chr15:51148001-51149000	1.36178	0.279806	0.163702	0.148834	2.13303e-06	0.0138837	230	0.531944	0.113061	0.830541	0.252929	0.362614	0.348387	0.00118877	1	hg19_cpg_inter	1		hg19_genes_1to5kb
chr1:155291001-155292000	1.04613	0.214996	0.163667	0.148799	2.14341e-06	0.0138837	230	0.320255	0.147992	0.626768	0.194903	0.361414	0.34716	0.00149294	2	hg19_cpg_islands	24		hg19_genes_promoters
chr2:228581001-228582000	1.40246	0.290212	0.164715	0.149665	2.51429e-06	0.0152561	227	0.870243	0.11006	1.04519	0.254543	0.377046	0.362952	5.664e-05	1	hg19_cpg_shores	3	SLC19A3	hg19_genes_introns
chr21:36577001-36578000	-1.57636	0.326908	0.157557	0.142378	2.63746e-06	0.0152561	227	0.349963	0.0980188	-0.85134	0.300974	0.351532	0.33686	0.00510487	1	hg19_cpg_inter	1	RUNX1	hg19_genes_introns
chr10:13771001-13772000	1.59526	0.331001	0.162156	0.147261	2.64716e-06	0.0152561	230	0.74443	0.0977281	0.98825	0.298089	0.36318	0.348965	0.0010678	1	hg19_cpg_inter	4	FRMD4A	hg19_genes_introns
chr3:172374001-172375000	1.03384	0.214009	0.1762	0.160126	2.65919e-06	0.0152561	210	0.854165	0.154113	0.773715	0.188465	0.382059	0.366913	5.838e-05	1	hg19_cpg_inter	4	NCEH1	hg19_genes_introns
chr1:3320001-3321000	1.03255	0.215388	0.161324	0.146414	2.97296e-06	0.0165231	230	0.478989	0.150478	0.652743	0.193228	0.364317	0.350128	0.00086063	1	hg19_cpg_shores	4	PRDM16	hg19_genes_introns
chr12:116963001-116964000	1.71627	0.35849	0.161117	0.146203	3.06016e-06	0.0165231	230	0.23422	0.0891147	1.22547	0.315392	0.374117	0.360146	0.00013447	1	hg19_cpg_inter	1		hg19_genes_intergenic
chr17:40839001-40840000	3.95074	0.826041	0.160962	0.146046	3.12687e-06	0.0165231	230	0.831236	0.0400265	2.34397	0.748259	0.359971	0.345685	0.00196416	3	hg19_cpg_islands	12	CNTNAP1	hg19_genes_exons
chr2:134865001-134866000	-1.03876	0.218067	0.16034	0.145413	3.4102e-06	0.0175231	230	0.634627	0.145014	-0.623233	0.197087	0.360482	0.346207	0.00178237	1	hg19_cpg_inter	1		hg19_genes_intergenic
chr22:38148001-38149000	1.04095	0.219065	0.159962	0.145028	3.59458e-06	0.0175231	230	0.264257	0.145644	0.595313	0.199378	0.357504	0.343163	0.00314222	1	hg19_cpg_inter	6	TRIOBP	hg19_genes_introns
chr17:71289001-71290000	1.03863	0.218713	0.159868	0.144932	3.64243e-06	0.0175231	230	0.501312	0.146798	0.594689	0.199004	0.357545	0.343205	0.00311784	1	hg19_cpg_inter	3	CDC42EP4	hg19_genes_introns
chr12:52215001-52216000	-1.4516	0.306095	0.159657	0.144717	3.75104e-06	0.0175231	230	0.600205	0.106391	-0.682024	0.286531	0.348414	0.333869	0.0181376	1	hg19_cpg_islands	1	FIGNL2	hg19_genes_exons
chr19:3403001-3404000	1.44327	0.304578	0.159536	0.144595	3.81448e-06	0.0175231	230	0.228638	0.106937	0.902663	0.273343	0.362947	0.348727	0.001116	1	hg19_cpg_inter	5	NFIC	hg19_genes_introns
chr14:97093001-97094000	-1.45882	0.307956	0.159489	0.144547	3.83971e-06	0.0175231	230	0.533936	0.10611	-0.71141	0.286725	0.349802	0.335289	0.0138311	1	hg19_cpg_inter	1		hg19_genes_intergenic
chr16:85180001-85181000	1.01304	0.214814	0.158808	0.143853	4.22194e-06	0.0188392	230	0.273243	0.146988	0.709601	0.189356	0.371345	0.357313	0.00022734	1	hg19_cpg_inter	1	LINC02139	hg19_genes_introns
chr1:8612001-8613000	2.59492	0.551049	0.166799	0.151297	4.46033e-06	0.0191725	220	0.928339	0.0597658	1.84752	0.486318	0.375413	0.36082	0.00018933	1	hg19_cpg_inter	3	RERE	hg19_genes_introns
chr1:167557001-167558000	-1.2918	0.274721	0.15837	0.143407	4.48758e-06	0.0191725	230	0.708379	0.117862	-0.827402	0.245446	0.364188	0.349996	0.00088199	1	hg19_cpg_inter	1		hg19_genes_intergenic
chr7:73448001-73449000	1.07645	0.229745	0.157832	0.14286	4.8361e-06	0.020231	230	0.34141	0.140793	0.828501	0.19955	0.37967	0.365824	4.689e-05	1	hg19_cpg_inter	16	ELN	hg19_genes_introns
chr11:68145001-68146000	1.20741	0.258177	0.157552	0.142575	5.02831e-06	0.0206058	230	0.648332	0.122678	0.797339	0.229479	0.366097	0.351948	0.00061423	1	hg19_cpg_inter	2	LRP5	hg19_genes_introns
chr16:27379001-27380000	-2.08312	0.446553	0.157176	0.142193	5.29827e-06	0.0212779	230	0.0966716	0.0714296	-1.54108	0.390103	0.375445	0.361504	0.00010454	1	hg19_cpg_inter	1		hg19_genes_intergenic
chr15:77200001-77201000	-1.78825	0.384004	0.156921	0.141933	5.4898e-06	0.0213511	230	0.826877	0.0823624	-1.07213	0.346112	0.359375	0.345075	0.00220004	1	hg19_cpg_shelves	4	SCAPER	hg19_genes_1to5kb
chr15:70433001-70434000	-1.37322	0.295152	0.156785	0.141794	5.59488e-06	0.0213511	230	0.231485	0.107451	-0.681649	0.273196	0.349998	0.335489	0.013314	1	hg19_cpg_inter	1		hg19_genes_intergenic
chr5:43034001-43035000	0.74158	0.158916	0.191493	0.175159	5.63551e-06	0.0213511	203	0.482579	0.207928	0.483594	0.138785	0.414694	0.399838	0.00060762	1	hg19_cpg_shelves	1		hg19_genes_intergenic
chr7:1141001-1142000	1.48671	0.320293	0.156439	0.141442	5.87023e-06	0.0214603	230	0.761958	0.10456	1.26738	0.273955	0.390196	0.376585	6.29908e-06	3	hg19_cpg_islands	3	C7orf50	hg19_genes_introns
chr17:65971001-65972000	1.60297	0.345586	0.156334	0.141336	5.95648e-06	0.0214603	230	0.65308	0.0920832	1.119	0.304425	0.369938	0.355874	0.00029679	1	hg19_cpg_inter	15	BPTF	hg19_genes_exons
chr6:161776001-161777000	-1.74762	0.376859	0.1563	0.141301	5.98494e-06	0.0214603	230	0.795614	0.0851157	-0.988987	0.342333	0.355931	0.341554	0.00424442	1	hg19_cpg_inter	15	PRKN	hg19_genes_introns
chr6:26598001-26599000	0.906457	0.194805	0.171038	0.152514	6.33979e-06	0.0219989	184	0.48291	0.177161	0.480922	0.184506	0.344207	0.325786	0.00992156	5	hg19_cpg_islands	7	ABT1	hg19_genes_exons
chr19:2040001-2041000	1.99133	0.430722	0.155853	0.140846	6.36837e-06	0.0219989	230	0.848419	0.0736732	1.55131	0.373249	0.379764	0.365919	4.606e-05	1	hg19_cpg_shores	27		hg19_genes_promoters
chr20:36042001-36043000	0.97731	0.211545	0.155746	0.140737	6.46382e-06	0.0219989	230	0.335462	0.149728	0.777448	0.182754	0.381872	0.368075	3.085e-05	1	hg19_cpg_inter	1		hg19_genes_intergenic
chr5:175079001-175080000	-1.53833	0.333499	0.157499	0.142454	6.68516e-06	0.022373	229	0.694924	0.0946132	-1.24999	0.287976	0.382335	0.368486	2.155e-05	1	hg19_cpg_inter	1		hg19_genes_intergenic
chr16:27378001-27379000	-2.31268	0.503494	0.154905	0.139881	7.26487e-06	0.0239145	230	0.122337	0.0655343	-1.29773	0.4573	0.355118	0.340723	0.00495929	1	hg19_cpg_inter	1		hg19_genes_intergenic
chr2:71819001-71820000	2.105	0.459703	0.154457	0.139425	7.73114e-06	0.0246095	230	0.874454	0.0688479	1.48755	0.403869	0.370083	0.356022	0.00028873	1	hg19_cpg_inter	16	DYSF	hg19_genes_introns
chr14:104197001-104198000	1.92051	0.419835	0.154313	0.139278	7.88789e-06	0.0246095	230	0.873249	0.0754902	1.21767	0.374615	0.362024	0.347784	0.00132963	1	hg19_cpg_shelves	5	ZFYVE21	hg19_genes_promoters
chr2:74412001-74413000	-1.02072	0.223192	0.154276	0.139241	7.92793e-06	0.0246095	230	0.707656	0.144473	-0.591222	0.201704	0.35661	0.342249	0.00372724	1	hg19_cpg_inter	1		hg19_genes_intergenic
chr16:86337001-86338000	1.51452	0.331245	0.154242	0.139206	7.96621e-06	0.0246095	230	0.412159	0.098657	0.947107	0.296133	0.361107	0.346846	0.00158259	3	hg19_cpg_islands	1		hg19_genes_intergenic
chr14:56333001-56334000	-1.45603	0.319251	0.153883	0.138841	8.37303e-06	0.0246911	230	0.703376	0.0994684	-0.691397	0.296127	0.347805	0.333247	0.0204386	1	hg19_cpg_inter	1		hg19_genes_intergenic
chr16:4356001-4357000	0.801997	0.175805	0.155109	0.139607	8.46012e-06	0.0246911	223	0.525257	0.183568	0.631054	0.152636	0.376383	0.362014	5.086e-05	1	hg19_cpg_shores	1		hg19_genes_intergenic
chr9:136268001-136269000	1.69177	0.371416	0.153699	0.138654	8.58945e-06	0.0246911	230	0.758506	0.086149	1.32022	0.321609	0.378675	0.364806	5.665e-05	1	hg19_cpg_inter	13	STKLD1	hg19_genes_exons
chr19:3656001-3657000	-1.38352	0.303721	0.158256	0.143021	8.65101e-06	0.0246911	226	0.808551	0.103992	-1.04608	0.265806	0.372027	0.357755	0.00011137	1	hg19_cpg_shelves	12	PIP5K1C	hg19_genes_exons
chr11:69345001-69346000	-2.09631	0.460449	0.153631	0.138584	8.67101e-06	0.0246911	230	0.878804	0.0680197	-1.61718	0.399348	0.377505	0.36361	7.073e-05	1	hg19_cpg_inter	1		hg19_genes_intergenic
chr15:74702001-74703000	1.81898	0.399672	0.153582	0.138534	8.73041e-06	0.0246911	230	0.771058	0.0798184	1.06911	0.360243	0.357207	0.342859	0.0033258	1	hg19_cpg_shores	6	SEMA7A	hg19_genes_exons
chr17:80052001-80053000	1.91174	0.420795	0.15333	0.138278	9.04029e-06	0.0252124	230	0.880742	0.07543	1.29525	0.371717	0.366283	0.352138	0.00059297	1	hg19_cpg_shores	1	FASN	hg19_genes_introns
chr21:45356001-45357000	1.83372	0.404121	0.153155	0.1381	9.26245e-06	0.0254781	230	0.769367	0.0794195	1.26771	0.355936	0.367738	0.353625	0.00045016	1	hg19_cpg_inter	2	AGPAT3	hg19_genes_introns
chr17:2881001-2882000	0.851872	0.187854	0.194369	0.178094	9.97644e-06	0.0269279	203	0.719372	0.175114	0.623348	0.163451	0.409674	0.394691	0.00018311	1	hg19_cpg_inter	2	RAP1GAP2	hg19_genes_introns
chr19:17453001-17454000	2.80742	0.621308	0.152562	0.137496	1.006e-05	0.0269279	230	0.829275	0.0508555	1.71775	0.556453	0.359194	0.34489	0.00227716	2	hg19_cpg_shelves	9	GTPBP3	hg19_genes_exons
chr18:29213001-29214000	-0.964554	0.214199	0.152079	0.137005	1.075e-05	0.0284118	230	0.670253	0.148741	-0.579013	0.192269	0.357928	0.343596	0.00289826	1	hg19_cpg_inter	3	B4GALT6	hg19_genes_introns
chr18:22915001-22916000	1.59739	0.355915	0.151799	0.136653	1.149e-05	0.0294316	229	0.797482	0.0907598	1.05744	0.315195	0.363888	0.349626	0.00093306	1	hg19_cpg_inter	4	ZNF521	hg19_genes_introns
chr17:1975001-1976000	1.13979	0.254019	0.15158	0.136497	1.152e-05	0.0294316	230	0.437855	0.125167	0.719763	0.226358	0.360785	0.346517	0.00168244	1	hg19_cpg_inter	4	SMG6	hg19_genes_introns
chr12:58132001-58133000	1.25857	0.280829	0.151412	0.136326	1.179e-05	0.0294316	230	0.308173	0.114124	0.875941	0.246902	0.367474	0.353355	0.00047324	4	hg19_cpg_islands	7	AGAP2	hg19_genes_promoters
chr2:129063001-129064000	1.19982	0.26782	0.151359	0.136273	1.188e-05	0.0294316	230	0.467202	0.118512	0.707974	0.240816	0.356752	0.342394	0.00362732	1	hg19_cpg_inter	1	HS6ST1	hg19_genes_introns
chr19:3464001-3465000	2.29483	0.512959	0.151166	0.136076	1.22e-05	0.0294316	230	0.633829	0.063578	1.34973	0.461363	0.356519	0.342156	0.00379247	4	hg19_cpg_islands	10	NFIC	hg19_genes_exons
chr19:47838001-47839000	-1.15679	0.258386	0.138799	0.122924	1.223e-05	0.0294316	222	0.798795	0.123033	-0.845271	0.226286	0.359292	0.344461	0.00023984	1	hg19_cpg_inter	3	C5AR2	hg19_genes_introns
chr19:11590001-11591000	2.05029	0.458462	0.151117	0.136026	1.229e-05	0.0294316	230	0.237582	0.0725369	1.35157	0.406027	0.363423	0.349213	0.00101978	2	hg19_cpg_islands	2	ELAVL3	hg19_genes_introns
chr22:46454001-46455000	0.958074	0.214349	0.151319	0.136164	1.244e-05	0.0294316	229	0.302981	0.147847	0.555552	0.193204	0.355696	0.34125	0.0044251	1	hg19_cpg_shelves	6		hg19_genes_promoters
chr20:50279001-50280000	-0.872088	0.195136	0.153899	0.138722	1.25e-05	0.0294316	228	0.539712	0.165537	-0.566278	0.173199	0.364542	0.35023	0.00124862	1	hg19_cpg_inter	3	ATP9A	hg19_genes_introns
chr8:142416001-142417000	1.30447	0.29217	0.150889	0.135794	1.268e-05	0.0294316	230	0.443843	0.109205	0.817046	0.260519	0.360034	0.345749	0.00194084	1	hg19_cpg_inter	1		hg19_genes_introns
chr11:63932001-63933000	1.27758	0.286231	0.150849	0.135753	1.275e-05	0.0294316	230	0.288608	0.111076	0.860015	0.252732	0.364771	0.350592	0.00078977	2	hg19_cpg_islands	1	MACROD1	hg19_genes_introns
chr7:157295001-157296000	-1.88636	0.422841	0.152515	0.137245	1.296e-05	0.0295615	227	0.130465	0.075381	-1.36509	0.371968	0.364521	0.350143	0.0003042	1	hg19_cpg_shores	1		hg19_genes_intergenic
chr19:5038001-5039000	1.42527	0.320716	0.150249	0.135142	1.386e-05	0.0309109	230	0.669022	0.0987081	1.1228	0.277128	0.377547	0.363653	7.017e-05	1	hg19_cpg_shores	3	KDM4B	hg19_genes_introns
chr5:176759001-176760000	-1.00559	0.226376	0.147985	0.132771	1.4e-05	0.0309109	229	0.662744	0.139747	-0.72793	0.197434	0.370953	0.356849	0.00028508	3	hg19_cpg_islands	4	LMAN2	hg19_genes_exons
chr5:126338001-126339000	0.975049	0.219373	0.153058	0.137518	1.401e-05	0.0309109	223	0.639565	0.148228	0.802001	0.190176	0.373296	0.358855	3.633e-05	1	hg19_cpg_inter	2	3-Mar	hg19_genes_introns
chr3:11610001-11611000	0.829524	0.186983	0.150241	0.135067	1.435e-05	0.0313124	229	0.338418	0.172268	0.582872	0.164022	0.368181	0.354015	0.00046369	3	hg19_cpg_islands	10	VGLL4	hg19_genes_promoters
chr14:104102001-104103000	1.2589	0.284047	0.166652	0.149986	1.537e-05	0.0331401	205	0.814705	0.117699	0.862339	0.251453	0.374619	0.358906	0.00073525	1	hg19_cpg_inter	5	KLC1	hg19_genes_introns
chr19:710001-711000	1.4148	0.320266	0.149434	0.134313	1.551e-05	0.0331401	230	0.197187	0.100933	0.960172	0.282258	0.36475	0.35057	0.00079285	2	hg19_cpg_islands	3	PALM	hg19_genes_introns
chr10:49674001-49675000	1.04197	0.236131	0.149284	0.13416	1.584e-05	0.0331694	230	0.342873	0.139135	0.62256	0.211614	0.356786	0.342429	0.00360404	3	hg19_cpg_islands	6	ARHGAP22	hg19_genes_introns
chr9:140094001-140095000	3.61123	0.818426	0.149275	0.134151	1.586e-05	0.0331694	230	0.0813446	0.0393326	2.45481	0.721081	0.364798	0.350619	0.00078575	1	hg19_cpg_islands	4	TPRN	hg19_genes_exons
chr3:175073001-175074000	-1.70139	0.386094	0.1491	0.133972	1.625e-05	0.0334331	230	0.831586	0.0815228	-1.0289	0.345413	0.357388	0.343044	0.00321289	1	hg19_cpg_inter	4	NAALADL2	hg19_genes_introns
chr14:78601001-78602000	-0.631471	0.142805	0.173182	0.156045	1.632e-05	0.0334331	198	0.345824	0.239926	-0.473662	0.123315	0.400463	0.38485	0.00016634	1	hg19_cpg_inter	1		hg19_genes_intergenic
chr6:7706001-7707000	-2.02802	0.461023	0.142541	0.127161	1.685e-05	0.034026	228	0.745165	0.0702515	-1.15469	0.411259	0.361068	0.346678	0.00543405	1	hg19_cpg_inter	1		hg19_genes_intergenic
chr6:37093001-37094000	0.947581	0.215695	0.147857	0.13264	1.724e-05	0.034026	229	0.31839	0.149107	0.638179	0.191084	0.358106	0.343714	0.00098272	1	hg19_cpg_inter	1		hg19_genes_intergenic
chr18:32822001-32823000	0.966408	0.220022	0.148246	0.133037	1.73e-05	0.034026	229	0.778114	0.144729	0.807977	0.188775	0.381033	0.367155	2.774e-05	1	hg19_cpg_shores	26	ZNF397	hg19_genes_5UTRs
chr19:42654001-42655000	1.5334	0.349298	0.148587	0.133451	1.744e-05	0.034026	230	0.27204	0.0941341	0.942339	0.311723	0.35812	0.343792	0.00279427	1	hg19_cpg_inter	1		hg19_genes_1to5kb
chr3:47326001-47327000	-1.95996	0.44661	0.148543	0.133406	1.755e-05	0.034026	230	0.780248	0.0726524	-0.517989	0.434808	0.336139	0.321321	0.234795	2	hg19_cpg_shores	10	KLHL18	hg19_genes_introns
chr14:34139001-34140000	2.17462	0.495917	0.148437	0.133298	1.781e-05	0.034026	230	0.868038	0.0633847	1.69074	0.42909	0.375237	0.361291	0.00010876	1	hg19_cpg_inter	5	NPAS3	hg19_genes_introns
chr11:68178001-68179000	1.40923	0.32148	0.148391	0.133252	1.792e-05	0.034026	230	0.793314	0.0994532	0.952723	0.283315	0.364038	0.349843	0.00090742	2	hg19_cpg_islands	6	LRP5	hg19_genes_exons
chr8:11705001-11706000	1.65712	0.378035	0.150395	0.134947	1.809e-05	0.034026	225	0.858274	0.0858039	1.21885	0.328507	0.375729	0.361476	0.00026251	1	hg19_cpg_inter	62	CTSB	hg19_genes_5UTRs
chr4:160268001-160269000	3.74688	0.852079	0.147841	0.130087	1.813e-05	0.034026	197	0.980134	0.0395747	3.09499	0.731432	0.382192	0.366019	3.602e-05	1	hg19_cpg_inter	3	RAPGEF2	hg19_genes_exons
chr11:67163001-67164000	1.50691	0.343876	0.163053	0.146398	1.892e-05	0.0346738	206	0.873389	0.0976968	0.986206	0.307196	0.365354	0.349488	0.00154465	1	hg19_cpg_shelves	26	RAD9A	hg19_genes_exons
chr9:137128001-137129000	1.15928	0.265293	0.147972	0.132824	1.899e-05	0.0346738	230	0.321316	0.124419	0.620989	0.240752	0.351203	0.336721	0.0105377	1	hg19_cpg_inter	1		hg19_genes_intergenic
chr16:75414001-75415000	-1.29055	0.295507	0.147893	0.132744	1.92e-05	0.0346738	230	0.423578	0.111312	-0.735659	0.2661	0.353976	0.339555	0.00617412	1	hg19_cpg_inter	2	CFDP1	hg19_genes_introns
chr16:16201001-16202000	2.39445	0.54849	0.147841	0.132691	1.934e-05	0.0346738	230	0.829914	0.0582732	1.77472	0.477474	0.370743	0.356697	0.00025483	1	hg19_cpg_inter	2	ABCC1	hg19_genes_introns
chr21:43460001-43461000	-0.641969	0.146187	0.198475	0.180362	1.934e-05	0.0346738	182	0.672656	0.237513	-0.519699	0.122308	0.449079	0.433427	3.473e-05	1	hg19_cpg_inter	1		hg19_genes_intergenic
chr12:22845001-22846000	-0.936248	0.214495	0.147439	0.132008	1.953e-05	0.0347082	226	0.637651	0.148423	-0.745065	0.18465	0.379248	0.36514	7.535e-05	1	hg19_cpg_inter	1		hg19_genes_intergenic
chr1:39975001-39976000	-1.288	0.2956	0.147588	0.132434	2.003e-05	0.0350242	230	0.231488	0.108128	-0.909185	0.258941	0.366783	0.352649	0.00053938	1	hg19_cpg_inter	1	BMP8A	hg19_genes_introns
chr2:87018001-87019000	6.50769	1.49156	0.161451	0.145247	2.023e-05	0.0350242	212	0.0115954	0.0221428	5.45559	1.2903	0.381184	0.366164	3.542e-05	2	hg19_cpg_islands	25	CD8A	hg19_genes_promoters
chr9:130281001-130282000	-1.05441	0.241974	0.138508	0.122176	2.054e-05	0.0350242	216	0.173579	0.134518	-0.773093	0.211397	0.361403	0.346198	0.00032251	1	hg19_cpg_inter	3	FAM129B	hg19_genes_introns
chr20:56016001-56017000	1.12663	0.258956	0.147388	0.132231	2.059e-05	0.0350242	230	0.306956	0.127034	0.71099	0.230116	0.35924	0.344938	0.00225724	1	hg19_cpg_inter	1		hg19_genes_intergenic
chr1:211898001-211899000	0.867592	0.199167	0.150434	0.134175	2.074e-05	0.0350242	214	0.234064	0.162865	0.452994	0.179277	0.366564	0.351337	0.0122555	1	hg19_cpg_inter	1		hg19_genes_intergenic
chr10:125674001-125675000	-1.28036	0.293481	0.139944	0.122392	2.076e-05	0.0350242	201	0.929664	0.117455	-0.909538	0.256714	0.365056	0.348776	0.00049501	1	hg19_cpg_inter	1	CPXM2	hg19_genes_introns
chr9:38741001-38742000	1.19871	0.276031	0.147145	0.131983	2.129e-05	0.0355979	230	0.424446	0.114156	1.04647	0.235268	0.386151	0.372449	1.365e-05	1	hg19_cpg_inter	1		hg19_genes_intergenic
chr4:89455001-89456000	-0.909138	0.209435	0.147092	0.131929	2.145e-05	0.0355979	230	0.731423	0.151932	-0.58839	0.185477	0.360656	0.346385	0.00172423	1	hg19_cpg_inter	1		hg19_genes_intergenic
chr14:90967001-90968000	-1.4782	0.340867	0.146961	0.131796	2.184e-05	0.0359498	230	0.399808	0.0934381	-0.995683	0.300312	0.363184	0.348969	0.00106704	1	hg19_cpg_inter	1		hg19_genes_intergenic
chr1:226863001-226864000	-3.34011	0.768994	0.17182	0.154292	2.285e-05	0.037308	194	0.0165414	0.043897	-2.29361	0.666882	0.401591	0.385676	0.0007183	1	hg19_cpg_inter	1	ITPKB	hg19_genes_introns
chr10:17755001-17756000	1.1451	0.264933	0.146525	0.131352	2.32e-05	0.037338	230	0.551657	0.12188	0.794034	0.232496	0.364998	0.350824	0.00075643	1	hg19_cpg_inter	3	STAM	hg19_genes_introns
chr16:2106001-2107000	1.02279	0.236639	0.146109	0.130861	2.324e-05	0.037338	229	0.433599	0.135376	0.702364	0.208072	0.363268	0.348991	0.00086878	1	hg19_cpg_shores	50	TSC2	hg19_genes_5UTRs
chr17:2078001-2079000	1.25702	0.291465	0.146239	0.131061	2.413e-05	0.0384133	230	0.207072	0.109601	0.916747	0.254111	0.368619	0.354525	0.00038101	1	hg19_cpg_inter	3	SMG6	hg19_genes_introns
chr16:88677001-88678000	5.14789	1.19408	0.146191	0.131012	2.43e-05	0.0384133	230	0.902138	0.0295217	3.38327	1.05485	0.361266	0.347009	0.00153555	1	hg19_cpg_inter	16	ZC3H18	hg19_genes_promoters
chr6:170586001-170587000	0.957767	0.223069	0.14566	0.130472	2.614e-05	0.040943	230	0.314224	0.144589	0.563765	0.199696	0.354886	0.340486	0.00518405	2	hg19_cpg_shores	1		hg19_genes_intergenic
chr12:107767001-107768000	1.62449	0.378481	0.145616	0.130427	2.63e-05	0.040943	230	0.718662	0.0854141	1.34228	0.324781	0.379266	0.36541	5.063e-05	1	hg19_cpg_inter	3	BTBD11	hg19_genes_introns
chr12:52438001-52439000	0.940609	0.219249	0.145556	0.130366	2.652e-05	0.0409657	230	0.355029	0.147183	0.546597	0.196565	0.354225	0.339811	0.005885	1	hg19_cpg_inter	2	NR4A1	hg19_genes_introns
chr21:46378001-46379000	0.978323	0.228181	0.145476	0.130285	2.682e-05	0.0411039	230	0.485963	0.143208	0.659384	0.200858	0.362599	0.348372	0.00119217	3	hg19_cpg_islands	2	FAM207A	hg19_genes_introns
chr2:203539001-203540000	-0.938702	0.218967	0.146042	0.130585	2.706e-05	0.0411617	226	0.830946	0.146569	-0.594676	0.193312	0.365085	0.350655	0.00236212	1	hg19_cpg_inter	2	FAM117B	hg19_genes_introns
chr14:104887001-104888000	-2.5612	0.598065	0.145325	0.130131	2.738e-05	0.0413386	230	0.914822	0.052888	-2.04207	0.515468	0.375675	0.361739	0.00010009	1	hg19_cpg_inter	1		hg19_genes_intergenic
chr8:144663001-144664000	5.43502	1.27318	0.144916	0.129715	2.897e-05	0.0434158	230	0.940953	0.0247628	3.74952	1.11716	0.363921	0.349723	0.00092784	1	hg19_cpg_shelves	84	EEF1D	hg19_genes_exons
chr19:56608001-56609000	0.752827	0.176406	0.148329	0.131872	3.007e-05	0.0444223	212	0.683644	0.189878	0.418652	0.157788	0.365135	0.349725	0.00859371	2	hg19_cpg_islands	1	ZNF787	hg19_genes_introns
chr22:50223001-50224000	-2.6405	0.619874	0.144643	0.129437	3.009e-05	0.0444223	230	0.927625	0.0518528	-1.50952	0.55639	0.353187	0.33875	0.00718438	2	hg19_cpg_shores	3	BRD1	hg19_genes_1to5kb
chr13:22177001-22178000	-0.984425	0.231451	0.144449	0.12924	3.09e-05	0.0448284	230	0.519136	0.137558	-0.589056	0.206589	0.355331	0.340942	0.00476018	2	hg19_cpg_islands	1	MICU2	hg19_genes_introns
chr17:8371001-8372000	0.902933	0.212303	0.14418	0.128897	3.098e-05	0.0448284	229	0.587879	0.154064	0.59516	0.187321	0.360457	0.346117	0.00169753	1	hg19_cpg_inter	6	NDEL1	hg19_genes_exons
chr22:18429001-18430000	1.06544	0.250559	0.144419	0.129209	3.103e-05	0.0448284	230	0.424829	0.130524	0.704462	0.22095	0.360935	0.34667	0.00163542	1	hg19_cpg_inter	5	MICAL3	hg19_genes_introns
chr17:14234001-14235000	1.05338	0.24818	0.144184	0.128969	3.206e-05	0.0459765	230	0.715591	0.130185	0.678013	0.21954	0.359217	0.344914	0.00226714	1	hg19_cpg_inter	1	HS3ST3B1	hg19_genes_introns
chr1:52083001-52084000	6.58017	1.5515	0.136992	0.120785	3.315e-05	0.047174	218	0.00809416	0.0207375	5.46495	1.3322	0.372295	0.357491	5.834e-05	1	hg19_cpg_inter	6	OSBPL9	hg19_genes_introns
chr21:45292001-45293000	-1.73741	0.41052	0.14382	0.128599	3.371e-05	0.047174	230	0.855306	0.0770215	-1.05105	0.365768	0.355684	0.341302	0.00444949	1	hg19_cpg_inter	1	AGPAT3	hg19_genes_introns
chr6:21479001-21480000	1.17906	0.278698	0.143772	0.12855	3.393e-05	0.047174	230	0.493823	0.114093	0.78249	0.245562	0.360903	0.346638	0.00164521	1	hg19_cpg_inter	1		hg19_genes_intergenic
chr1:228562001-228563000	0.915553	0.21645	0.143954	0.128668	3.409e-05	0.047174	229	0.569234	0.150282	0.597713	0.191038	0.360475	0.346136	0.00198972	1	hg19_cpg_shelves	21	OBSCN	hg19_genes_exons
chr19:52239001-52240000	-0.884925	0.209309	0.139833	0.124404	3.443e-05	0.047174	228	0.345389	0.159438	-0.655673	0.181868	0.366438	0.352169	0.00038513	1	hg19_cpg_inter	1		hg19_genes_intergenic
chr5:139532001-139533000	1.59286	0.376792	0.141801	0.126407	3.449e-05	0.047174	228	0.743669	0.0883239	1.01773	0.334682	0.353346	0.338782	0.00264234	1	hg19_cpg_inter	1		hg19_genes_intergenic
chr17:21101001-21102000	2.21429	0.523928	0.143644	0.12842	3.453e-05	0.047174	230	0.912916	0.0605445	1.46201	0.461888	0.360535	0.346261	0.00176448	1	hg19_cpg_inter	7	TMEM11	hg19_genes_exons
chr1:245218001-245219000	-0.837138	0.198101	0.149727	0.134406	3.478e-05	0.0471819	227	0.771511	0.159364	-0.502304	0.175242	0.369099	0.354826	0.00455355	1	hg19_cpg_inter	5	EFCAB2	hg19_genes_introns
chr10:101281001-101282000	1.18105	0.280032	0.143383	0.128155	3.58e-05	0.0482469	230	0.319214	0.11581	0.724133	0.249028	0.356234	0.341864	0.00400533	2	hg19_cpg_islands	2		hg19_genes_1to5kb
chr8:129874001-129875000	0.65506	0.155407	0.151086	0.135651	3.645e-05	0.0487969	225	0.661949	0.208844	0.525862	0.131995	0.396918	0.383149	9.229e-05	1	hg19_cpg_inter	1		hg19_genes_intergenic
chr5:149181001-149182000	0.735085	0.173843	0.152042	0.133904	3.678e-05	0.0489163	192	0.320116	0.208141	0.601922	0.150213	0.377624	0.360893	8.883e-05	1	hg19_cpg_inter	4	PPARGC1B	hg19_genes_introns
chr3:29072001-29073000	-0.880653	0.209226	0.142742	0.127434	3.713e-05	0.0489314	229	0.4238	0.152597	-0.632669	0.181931	0.369654	0.355521	0.00060831	1	hg19_cpg_inter	1		hg19_genes_intergenic
chr9:140263001-140264000	1.61447	0.383763	0.143067	0.127833	3.74e-05	0.0489314	230	0.597147	0.0836351	1.10686	0.336687	0.362682	0.348457	0.00117352	2	hg19_cpg_islands	6	EXD3	hg19_genes_introns
chr10:116635001-116636000	-0.876003	0.208407	0.147163	0.131796	3.813e-05	0.0489314	227	0.532129	0.155744	-0.532704	0.184963	0.36219	0.34776	0.00436699	1	hg19_cpg_inter	1	FAM160B1	hg19_genes_introns
chr1:6615001-6616000	0.882965	0.210293	0.142824	0.127585	3.867e-05	0.0489314	230	0.613925	0.154317	0.617389	0.184039	0.363891	0.349692	0.00093312	1	hg19_cpg_shores	12	TAS1R1	hg19_genes_promoters
chr10:134019001-134020000	-0.706072	0.167607	0.144836	0.126737	3.904e-05	0.0489314	194	0.635019	0.205366	-0.544969	0.142088	0.398578	0.382582	0.00017097	3	hg19_cpg_islands	3	DPYSL4	hg19_genes_exons
chr5:142295001-142296000	1.50468	0.358579	0.142749	0.127509	3.907e-05	0.0489314	230	0.773837	0.0924971	1.1379	0.310868	0.369638	0.355567	0.00031414	1	hg19_cpg_inter	3	ARHGAP26	hg19_genes_introns
chr10:80874001-80875000	1.2284	0.29277	0.142736	0.127496	3.914e-05	0.0489314	230	0.467004	0.108262	0.85601	0.256314	0.36362	0.349415	0.00098231	1	hg19_cpg_inter	1	ZMIZ1	hg19_genes_introns
chr19:14528001-14529000	-1.79853	0.428652	0.142736	0.127496	3.915e-05	0.0489314	230	0.639411	0.0735689	-1.27361	0.374554	0.364724	0.350544	0.00079674	1	hg19_cpg_shores	4	DDX39A	hg19_genes_introns
chr10:6260001-6261000	1.41393	0.337117	0.143327	0.128029	3.946e-05	0.0489314	229	0.879733	0.0939259	0.830629	0.302266	0.350311	0.335743	0.00648654	2	hg19_cpg_shores	5	PFKFB3	hg19_genes_introns
chr7:39393001-39394000	0.941873	0.224615	0.142662	0.12742	3.955e-05	0.0489314	230	0.491091	0.144573	0.638885	0.197273	0.361815	0.34757	0.00138359	1	hg19_cpg_inter	3	POU6F2	hg19_genes_introns
chr15:75019001-75020000	1.08754	0.259354	0.142661	0.12742	3.955e-05	0.0489314	230	0.369914	0.123389	0.637014	0.231744	0.353732	0.339307	0.00646956	2	hg19_cpg_islands	9	CYP1A1	hg19_genes_1to5kb
chr17:41712001-41713000	0.694403	0.165515	0.155193	0.139328	3.997e-05	0.0489314	218	0.287809	0.194472	0.332554	0.150747	0.361268	0.346204	0.0284547	1	hg19_cpg_inter	1		hg19_genes_intergenic
chr8:10282001-10283000	2.31442	0.552529	0.142529	0.127285	4.028e-05	0.0489314	230	0.864901	0.0570487	1.96077	0.472573	0.379612	0.365765	4.74e-05	1	hg19_cpg_inter	4	MSRA	hg19_genes_introns
chr8:130996001-130997000	1.18305	0.282484	0.142506	0.127261	4.041e-05	0.0489314	230	0.362369	0.115038	0.58051	0.257378	0.346768	0.332187	0.0250698	2	hg19_cpg_islands	3	FAM49B	hg19_genes_introns
chr4:1832001-1833000	-1.52079	0.363225	0.142473	0.127228	4.059e-05	0.0489314	230	0.86342	0.0870934	-1.12064	0.315846	0.367481	0.353362	0.00047264	2	hg19_cpg_shelves	1	LETM1	hg19_genes_introns
chr17:43319001-43320000	1.19272	0.284913	0.142455	0.127209	4.069e-05	0.0489314	230	0.528875	0.122321	0.903068	0.246946	0.369571	0.355499	0.00031815	2	hg19_cpg_islands	22	FMNL1	hg19_genes_promoters
chr1:2979001-2980000	1.06513	0.254716	0.142318	0.12707	4.147e-05	0.0495672	230	0.318746	0.127761	0.643598	0.226723	0.355132	0.340737	0.00494605	2	hg19_cpg_islands	1	LINC00982	hg19_genes_exons

## Sheet: table-S9
Supplementary Table-9: CpG sites associated with Matsuda index are also cis-eQTM site for Matsuda index-associated transcripts.
Integration of Matsuda Index CpG site EWAS, cis-eQTM site analysis, and transcript to Matsuda index association (TWAS) results.
CpG sites that are eQTM (linear regression analysis and partial correlation FDR-P<0.05 and partial correlation r+/-0.2) for a Matsuda index-associated transcript (TWAS, FDR-P<0.01) and CpG site is also associated with Matsuda index (EWAS, P<0.01) are shown.
Results are sorted by P_CIT (omnibus P-value).
	Matsuda Index EWAS											eQTM (Linear Regression)				eQTM (Partial Correlation)			Methylation Level			Matsuda index to Transcript association (TWAS)											Causal Inference Test (CIT)
CpG_site	Beta	StdErr	R2_full	adj_R2_full	P-value	FDR_P	transcript Probe ID	Chr	Start	End	Symbol	Beta	SE	P_value	FDR_P	Corr_Coeff	P	FDR_P	N	Mean	StDev	Probe_Id	Entrez_Gene_ID	Symbol	Definition	Gene_symbol	beta	se_beta	R2_full	adj_R2_full	pval	qval	sitenameL	probeidG	traitT	p_cit	p_TassocL	p_TassocGgvnL	p_GassocLgvnT	p_LindTgvnG
chr7:28998407	-1.93541	0.498201	0.119301	0.102992	0.00013619	0.251036	ILMN_1682928	7	29035246	29186153	CPVL	1.06783	0.2038	3.69682e-07	0.00265092	0.33255	3.089e-07	0.00496038	226	0.0771109	0.0956938	ILMN_1682928	54504	CPVL	carboxypeptidase, vitellogenic-like (CPVL), transcript variant 2, mRNA.	CPVL	-1.23017	0.132862	0.294802	0.283097	1.17354e-17	7.70853e-15	chr7:28998407	ILMN_1682928	Matsuda Index	0.000316687	0.000136186	4.79784e-13	0.000316687	7.81088e-06
chr18:74818424	0.722285	0.206357	0.120028	0.102774	0.00057093	0.348696	ILMN_1672660	18	74724738	74844774	MBP	-0.335292	0.0639332	3.61184e-07	0.00262162	-0.33102	7.254e-07	0.00964151	214	0.575973	0.239014	ILMN_1672660	4155	MBP	myelin basic protein (MBP), transcript variant 8, mRNA.	MBP	-1.25915	0.186432	0.196106	0.182763	1.06892e-10	6.94414e-09	chr18:74818424	ILMN_1672660	Matsuda Index	0.00202946	0.000570934	1.27335e-08	1.36214e-05	0.00202946
chr1:153486751	1.88213	0.458845	0.125058	0.10915	5.771e-05	0.201725	ILMN_1688780	1	153516094	153518282	S100A4	-0.932186	0.210102	1.42919e-05	0.0402082	-0.29359	5.94e-06	0.0487117	230	0.728233	0.103598	ILMN_1688780	6275	S100A4	S100 calcium binding protein A4 (S100A4), transcript variant 2, mRNA.	S100A4	-1.04473	0.137693	0.228288	0.21548	7.09499e-13	8.434e-11	chr1:153486751	ILMN_1688780	Matsuda Index	0.00383967	5.77069e-05	1.58041e-08	0.00308343	0.00383967
chr22:50981136	0.821868	0.301826	0.088852	0.072285	0.00698848	0.566124	ILMN_3223126	22	50964180	50968514	TYMP	-0.341806	0.068093	1.05173e-06	0.0058749	-0.3196	7.382e-07	0.00972767	230	0.70004	0.156844	ILMN_3223126	1890	TYMP	thymidine phosphorylase (TYMP), transcript variant 3, mRNA.	TYMP	-1.89797	0.25704	0.220335	0.207395	2.49286e-12	2.56857e-10	chr22:50981136	ILMN_3223126	Matsuda Index	0.00698848	0.00698848	1.5983e-09	1.35002e-05	7.01107e-06
chr22:50981136	0.821868	0.301826	0.088852	0.072285	0.00698848	0.566124	ILMN_2109708	22	50964180	50968514	ECGF1	-0.605922	0.126126	2.8387e-06	0.0126855	-0.30368	2.71e-06	0.025767	230	0.70004	0.156844	ILMN_2109708	1890	ECGF1	endothelial cell growth factor 1 (platelet-derived) (ECGF1), mRNA.	TYMP	-1.02328	0.135826	0.226184	0.213341	9.90474e-13	1.14812e-10	chr22:50981136	ILMN_2109708	Matsuda Index	0.00698848	0.00698848	4.27668e-11	0.000157309	7.56714e-07
chr22:50981136	0.821868	0.301826	0.088852	0.072285	0.00698848	0.566124	ILMN_3297126	22	50964180	50968514	TYMP	-0.236738	0.0531043	1.30556e-05	0.0379534	-0.30166	3.179e-06	0.0293505	230	0.70004	0.156844	ILMN_3297126	1890	TYMP	thymidine phosphorylase (TYMP), transcript variant 1, mRNA.	TYMP	-2.00749	0.34442	0.162066	0.148159	1.78378e-08	6.19853e-07	chr22:50981136	ILMN_3297126	Matsuda Index	0.00698848	0.00698848	8.46823e-07	0.000358683	0.000726111
chr3:158443556	-0.636625	0.235904	0.105741	0.086815	0.00759261	0.573367	ILMN_1789751	3	158519714	158547508	MFSD1	0.263272	0.0590603	1.30719e-05	0.0379534	0.32919	2.059e-06	0.0210214	199	0.22554	0.213193	ILMN_1789751	64747	MFSD1	major facilitator superfamily domain containing 1 (MFSD1), mRNA.	MFSD1	-2.00104	0.227951	0.27558	0.263556	3.11649e-16	1.16977e-13	chr3:158443556	ILMN_1789751	Matsuda Index	0.00759261	0.00759261	1.60653e-09	0.000883191	0.00498819
chr22:37908796	-0.937798	0.251788	0.114192	0.098013	0.00024893	0.280565	ILMN_1687306	22	37966252	37976024	LGALS2	0.245226	0.0421282	2.00128e-08	0.000280492	0.32167	6.563e-07	0.0089538	229	0.324572	0.189382	ILMN_1687306	3957	LGALS2	lectin, galactoside-binding, soluble, 2 (LGALS2), mRNA.	LGALS2	-1.72775	0.349148	0.132129	0.117724	1.40503e-06	2.86174e-05	chr22:37908796	ILMN_1687306	Matsuda Index	0.00982975	0.000248931	4.79733e-05	4.84421e-06	0.00982975
chr7:45068250	1.51841	0.360258	0.128513	0.112668	3.65e-05	0.18366	ILMN_1692295	7	45002259	45018704	MYO1G	-0.402513	0.0721581	6.94264e-08	0.000728138	-0.32745	3.782e-07	0.00577237	230	0.698679	0.133202	ILMN_1692295	64005	MYO1G	myosin IG (MYO1G), mRNA.	MYO1G	-1.33998	0.313628	0.111263	0.0965119	2.78424e-05	0.000384573	chr7:45068250	ILMN_1692295	Matsuda Index	0.0337397	3.6504e-05	0.000296621	3.28886e-07	0.0337397
chr7:45068283	1.50597	0.368541	0.124587	0.10867	6.142e-05	0.205599	ILMN_1692295	7	45002259	45018704	MYO1G	-0.376627	0.0743743	8.54416e-07	0.00506644	-0.31279	1.299e-06	0.0147312	230	0.679523	0.130322	ILMN_1692295	64005	MYO1G	myosin IG (MYO1G), mRNA.	MYO1G	-1.33998	0.313628	0.111263	0.0965119	2.78424e-05	0.000384573	chr7:45068283	ILMN_1692295	Matsuda Index	0.037113	6.1423e-05	0.000167391	7.06595e-06	0.037113
chr7:45068297	1.88575	0.380957	0.152532	0.137123	1.47552e-06	0.0555631	ILMN_1692295	7	45002259	45018704	MYO1G	-0.406597	0.0779715	4.16848e-07	0.00289488	-0.31533	1.054e-06	0.0127937	230	0.724078	0.123823	ILMN_1692295	64005	MYO1G	myosin IG (MYO1G), mRNA.	MYO1G	-1.33998	0.313628	0.111263	0.0965119	2.78424e-05	0.000384573	chr7:45068297	ILMN_1692295	Matsuda Index	0.0598747	1.47552e-06	0.000491462	4.94989e-06	0.0598747
chr22:39531159	-0.784608	0.266182	0.098061	0.080799	0.00356606	0.498741	ILMN_2412172	22	39436672	39440428	APOBEC3F	0.292516	0.0474777	3.29612e-09	6.04966e-05	0.35583	6.613e-08	0.00147481	218	0.336395	0.188407	ILMN_2412172	200316	APOBEC3F	apolipoprotein B mRNA editing enzyme, catalytic polypeptide-like 3F (APOBEC3F), transcript variant 2, mRNA.	APOBEC3F	-1.38614	0.356392	0.100412	0.0854815	0.000130037	0.00145803	chr22:39531159	ILMN_2412172	Matsuda Index	0.097724	0.00356606	0.014881	1.43323e-08	0.097724
chr18:74818424	0.722285	0.206357	0.120028	0.102774	0.00057093	0.348696	ILMN_2331544	18	74690788	74844774	MBP	-0.132504	0.0295437	1.16248e-05	0.0349361	-0.319	1.895e-06	0.0194796	214	0.575973	0.239014	ILMN_2331544	4155	MBP	myelin basic protein (MBP), transcript variant 7, mRNA.	MBP	-1.69506	0.45732	0.095507	0.0804947	0.000260727	0.00265236	chr18:74818424	ILMN_2331544	Matsuda Index	0.205795	0.000570934	0.0158548	3.56428e-05	0.205795
chr2:113346566	-0.853055	0.231136	0.134827	0.11398	0.00030293	0.297877	ILMN_1764043	2	113239742	113290222	TTL	0.152179	0.0285039	2.28156e-07	0.00181316	0.37057	4.82e-07	0.00707706	174	0.588419	0.243638	ILMN_1764043	150465	TTL	tubulin tyrosine ligase (TTL), mRNA.	TTL	-2.10049	0.462011	0.119467	0.104852	8.64219e-06	0.000139449	chr2:113346566	ILMN_1764043	Matsuda Index	0.340791	0.000302933	0.0085853	0.000814833	0.340791

[truncated: 5 more sheets: table-S10, table-S11, table-S12, table-S13, table-S14]
